# Supplementary material for: Application of organocatalysis in bioorganometallic chemistry: asymmetric synthesis of multifunctionalized spirocyclic pyrazolone–ferrocene hybrids as novel RalA inhibitors
Source: Royal Society of Chemistry journal article supplement (doi:10.1039/c8qo00422f), 2018-01-01
Supplement: c8qo00422f1.pdf [file c8qo00422f1.pdf]

# Application of Organocatalysis in Bioorganometallic Chemistry: Asymmetric Synthesis of Multifunctionalized Spirocyclic Pyrazolone- Ferrocene Hybrids as Novel RalA Inhibitors

Yuehua Zhang,<sup>a</sup> Chunting Wang,<sup>a</sup> Wei Huang,<sup>b</sup> Phensinee Haruehanroengra,<sup>c</sup> Cheng Peng,<sup>b</sup> Jia

Sheng,<sup>c</sup> Bo Han<sup>\*,b,c</sup> and Gu He<sup>\*,a</sup>

<sup>a</sup> State Key Laboratory of Biotherapy and Cancer Center, West China Hospital, Sichuan University, Chengdu 610041, China. E-mail: hegu@scu.edu.cn

<sup>b</sup> School of Pharmacy, Chengdu University of Traditional Chinese Medicine, Chengdu 611137, China. E-mail: hanbo@cduetcm.edu.cn

<sup>c</sup> Department of Chemistry and The RNA Institute, University at Albany, State University of New York, Albany 12222, United States. E-mail: bhan@albany.edu

## Supporting Information

### Table of Contents

|                                                                                           |     |
|-------------------------------------------------------------------------------------------|-----|
| <b>1. Experimental details</b> .....                                                      | S2  |
| 1.1 General methods for synthesis.....                                                    | S2  |
| 1.2 Optimization of the model reaction (Table S1) .....                                   | S3  |
| 1.3 Cell culture and cellular proliferation assay.....                                    | S4  |
| 1.4 The HTRF based assay of RalA-substrate interaction.....                               | S4  |
| 1.5 Transmission electronic microscopy.....                                               | S5  |
| 1.6 Apoptosis assay by Flow Cytometry (FCM) and fluorescent microscopy.....               | S5  |
| 1.7 GST pull down assay.....                                                              | S6  |
| 1.8 Western blot analysis.....                                                            | S6  |
| <b>2. Asymmetric synthesis of spirocyclic pyrazolone-ferrocene derivates</b> .....        | S7  |
| <b>3. Crystal data of 4m and 5b</b> .....                                                 | S33 |
| <b>4. NMR spectra and HPLC chromatograms</b> .....                                        | S35 |
| <b>5. RalA mRNA and protein expression in pancreatic cancer tissues (Figure S1)</b> ..... | S91 |
| <b>6. Preliminary screening of the anti-proliferative activity (Table S2)</b> .....       | S92 |
| <b>7. The superposition of binding conforms of 9e and p53 peptide (Figure S2)</b> .....   | S93 |
| <b>8. The intracellular ROS induced by 5b and 5b' (Figure S3)</b> .....                   | S94 |

## 1. Experimental details

### 1.1 General methods for synthesis

- Proton nuclear magnetic resonance ( $^1\text{H}$  NMR) spectra were recorded with Bruker Avance III 400 MHz spectrometers. Proton chemical shifts are reported in parts per million ( $\delta$  scale), and are referenced using residual protium in the NMR solvent ( $\text{CDCl}_3$ :  $\delta$  7.26 ( $\text{CHCl}_3$ )). Data are reported as follows: chemical shift [multiplicity (s = singlet, d = doublet, t = triplet, q = quartet, m = multiplet, br s = broad singlet), coupling constant(s) (Hz), integration].
- Carbon-13 nuclear magnetic resonance ( $^{13}\text{C}$  NMR) spectra were recorded with Bruker Avance 400 MHz spectrometers. Carbon chemical shifts are reported in parts per million ( $\delta$  scale), and are referenced using the carbon resonances of the solvent ( $\delta$  77.0 ( $\text{CHCl}_3$ )). Data are reported as follows: chemical shift [multiplicity (if not singlet), assignment ( $\text{C}_q$  = fully substituted carbon)].
- High resolution mass spectra (HRMS) were recorded on a Waters SYNAPT G2 using an electrospray (ESI) ionization source.
- High Performance Liquid Chromatography (HPLC) was analyzed by chiral column in comparison with authentic racemates, using a Daicel Chiralpak AD-H Column (250 x 4.6 mm), Daicel Chiralpak OD-H Column (250 x 4.6 mm), Daicel Chiralpak IC-H Column (250 x 4.6 mm) or Daicel Chiralpak IE-H Column (250 x 4.6 mm). UV detection was performed at 220 nm or 254 nm.
- Optical rotation values were measured with instruments operating at  $\lambda = 589$  nm, corresponding to the sodium D line at 25 °C.
- Column chromatography was performed on silica gel (400-500 mesh) eluting with ethyl acetate and petroleum ether. TLC was performed on glass-backed silica plates. UV light and  $\text{I}_2$  were used to visualize products.
- Melting points were determined on a Mel-Temp apparatus and are uncorrected.

## 1.2 Optimization of the model reaction (Table S1)<sup>a</sup>

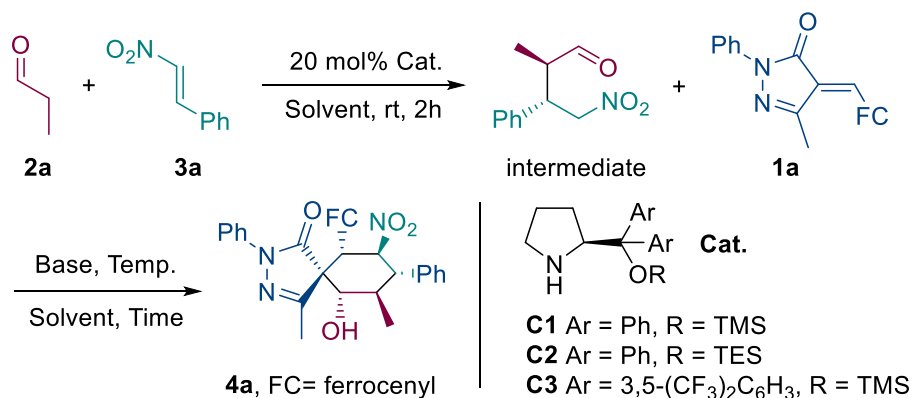

| Entry     | Catalyst  | Solvent                         | Base                           | Temp (°C) | Time <sup>b</sup> | Yield <sup>c</sup> (%) | dr <sup>d</sup> | ee <sup>e</sup> (%) |
|-----------|-----------|---------------------------------|--------------------------------|-----------|-------------------|------------------------|-----------------|---------------------|
| 1         | <b>C1</b> | Toluene                         | TEA                            | rt        | 12 h              | 42                     | 90:10           | 92                  |
| 2         | <b>C2</b> | Toluene                         | TEA                            | rt        | 12 h              | 30                     | 90:10           | 92                  |
| 3         | <b>C3</b> | Toluene                         | TEA                            | rt        | 12 h              | 28                     | 92:8            | 94                  |
| 4         | <b>C1</b> | CH <sub>2</sub> Cl <sub>2</sub> | TEA                            | rt        | 12 h              | 37                     | 85:15           | 90                  |
| 5         | <b>C1</b> | THF                             | TEA                            | rt        | 12 h              | 23                     | 80:20           | 91                  |
| 6         | <b>C1</b> | Acetone                         | TEA                            | rt        | 8 h               | 55                     | >20:1           | 94                  |
| 7         | <b>C1</b> | MeCN                            | TEA                            | rt        | 8 h               | 59                     | >20:1           | 93                  |
| 8         | <b>C1</b> | MeCN                            | K <sub>2</sub> CO <sub>3</sub> | rt        | 8 h               | 52                     | 90:10           | 92                  |
| 9         | <b>C1</b> | MeCN                            | DIPEA                          | rt        | 12 h              | 48                     | >20:1           | 92                  |
| <b>10</b> | <b>C1</b> | <b>MeCN</b>                     | <b>DBU</b>                     | <b>rt</b> | <b>4 h</b>        | <b>65</b>              | <b>&gt;20:1</b> | <b>94</b>           |
| 11        | <b>C1</b> | MeCN                            | DBU                            | 35        | 4 h               | 60                     | 92:8            | 94                  |
| 12        | <b>C1</b> | MeCN                            | DBU                            | 60        | 2 h               | 56                     | 88:12           | 93                  |

<sup>a</sup> Reactions were performed with **2a** (0.80 mmol), **3a** (0.40 mmol), **Cat.** (0.08 mmol) and AcOH (0.08 mmol) in the indicated solvent (4.0 mL) at room temperature for 2 h, after which **1a** (0.3 mmol) and base (0.1 mmol) were added in the indicated solvent. <sup>b</sup> Reaction time in the second step. <sup>c</sup> Yield of isolated **4a**. <sup>d</sup> Calculated based on <sup>1</sup>H NMR analysis of the crude reaction mixture. <sup>e</sup> Determined by HPLC using a chiral stationary phase.

We initially investigated the three-component domino reaction using propanal **2a**, nitrostyrene **3a** and pyrazolone substrate **1a** as the standard substrates. The first Michael reaction proceeded in the presence of catalyst **C1** (20 mol%) in toluene at room temperature for two hours. A toluene solution of pyrazolone **1a** and triethylamine was added in a one-pot operation, resulting in successive Michael

and aldol reactions. To our gratification, the tandem reaction proceeded smoothly to afford the desired product **4a** with good diastereoselectivity and excellent enantioselectivity, albeit in moderate yield (entry 1). Subsequently, several chiral secondary amine catalysts were tested. The triethylsilyloxy ether **C2** provided an equally good stereoselectivity, but in relatively low yield (entry 2). High enantiocontrol was also achieved when catalyst **C3** containing electron-withdrawing substituents, but slower reaction rate was observed (entry 3). The same reaction in CH<sub>2</sub>Cl<sub>2</sub>, THF and acetone also provided **4a** with lower yields or at slower rates for completion (entries 4-6), except for the reactions in acetonitrile that provided 59% yields of the adduct (entry 7). It was found that the base condition in the second Michael step had some influence on the reaction efficiency (entries 8-10), and DBU proved to be the best choice. Conducting the reaction at higher temperature did not improve the reaction rate (entries 11 and 12). The reaction condition in entry 10 was chosen as the optimal one for further investigation on the substrate scope.

### **1.3 Cell culture and cellular proliferation assay**

The human pancreatic cancer cell lines PANC-1 and HPAF-II were obtained from ATCC (American type culture collection) and cultured in our laboratory, the cells were incubated under sterile conditions at 37°C and were maintained in a humidified atmosphere 5% CO<sub>2</sub> (v/v) with DMEM medium containing 10% fetal bovine serum (GIBCO, Waltham, MA, USA). MTT assay was performed to evaluate the cellular proliferation inhibitory activities of tested compound by a panel of cancer cells. In general, cells were seeded into 96-well plates and treated with a series of concentration of test drugs for 48 hours. The MTT reagent (5 mg/ml) was added per well for 3 h at 37°C. After that, the MTT was removed and 150 µl DMSO was added to dissolve the formazan crystals. Then, optical density (OD) was measured at 570 nm of the solution. The control group consisted of untreated cells. The percentage of cell viability averaged from three individual experiments.

### **1.4 The HTRF based assay of RalA-substrate interaction**

The enzymatic assay of test compounds are using the HTRF based method provided by Cisbio Co. Ltd., in brief, the HTRF assay used a GST-tagged RalA protein, and then the biotinylated substrate peptide of C3 exoenzyme and two HTRF detection reagents are added. The HTRF signal is



proportional to the amount of interaction between GST-tagged RalA and biotinylated substrate C3 exoenzyme peptide, the detailed experimental procedures are according to the manufacturer's protocols.

### **1.5 Transmission electronic microscopy**

The ultrastructure of mitochondrial morphology was observed using a Hitachi transmission electron microscope similar to our previous reports. Briefly, collected cells were fixed with 2% glutaraldehyde for 2 hours, washed with PBS and then post-fixed with 1% OsO<sub>4</sub> for 1.5 hours at 4°C. The samples were then washed and dehydrated with graded alcohol. After dehydration, the samples were infiltrated and embedded in 618 epoxy resin. Ultrathin sections were cut, stained with uranyl acetate and lead citrate and then examined under the transmission electron microscope (Hitachi 7000, Hitachi, Japan).

### **1.6 Apoptosis assay by Flow Cytometry (FCM) and fluorescent microscopy**

PANC-1 cells were seeded in six-well plates for 12 hours, and then treated with compound 5b (2 or 5 µM, respectively) or vehicle (DMSO) for 24 hours. Cells were collected, then fixed with 75% ice-cold ethanol and stored at -20 °C for another one hour. The flow cytometric analysis was used to identify different micelles apoptosis inducing effect. PANC-1 cells treated with compound 5b or blank solvent (control) were gently trypsinized without EDTA and centrifuged at 2000 rpm for 5 minutes. Then, the harvested cells were washed with 1.0 ml ice cold PBS and re-suspended in 500 µl 1×binding buffer, and incubated with 5 µl of Annexin V-FITC and 5 µl of propidium iodide (PI) for 15 min at room temperature. Followed by FCM (BD FACS Calibur, BD, USA) using the FL1 channel for Annexin V-FITC and the FL2 channel of PI. Both early apoptotic (Annexin V+/PI-) and late apoptotic (Annexin V+/PI+) cells are included in the cell assay of apoptosis. In addition, PANC-1 cells were plated in six-well plates, the cells were grew and adhered for 24 hours, then incubated with 2 or 5 µM of 5b for an additional 12 hours followed by Hoechst 33258 addition. The morphology of nuclei was visualized under an Olympus fluorescence microscope.

### **1.7 GST pull down assay**

To analyze effects of compound 5b on RalA activation, PANC-1 cells were seeded in six-plate dishes and cultured for 5 hours, after which cells were washed and lysed as described above. Lysates were cleared by centrifugation at 16,000 g for 5 min, and supernatants were incubated with 10 $\mu$ l of RalBP1-glutathione transferase (GST) bound to glutathione-Sepharose (GSH) beads for 1 h at 4°C with rocking as previously described. The beads were washed twice with lysis buffer, resuspended in Laemmli electrophoresis sample buffer, resolved, and immunoblotted for RalA as described above.

### **1.8 Western blot analysis**

The different concentrations of drug treated cells were harvested and washed with cold 1 $\times$ PBS. Total cell lysates were prepared in lysis RIPA buffer (Invitrogen, CA, USA) on ice for 30 min, followed by centrifugation at 13000 rpm for 30 min at 4°C. After collecting supernatant, protein concentration was determined by a bicinchoninic acid protein assay kit (Thermo, USA). The protein was resolved on a 10-15% SDS-polyacrylamide gel, electro blotted onto nitrocellulose membranes, and then incubated with proper primary antibodies which were purchased from Cell Signaling Technology or Santa Cruz Biotechnology and secondary antibodies before visualization by chemiluminescence Kit (Millpore, USA).

## 2. Asymmetric synthesis of spirocyclic pyrazolone-ferrocene derivatives

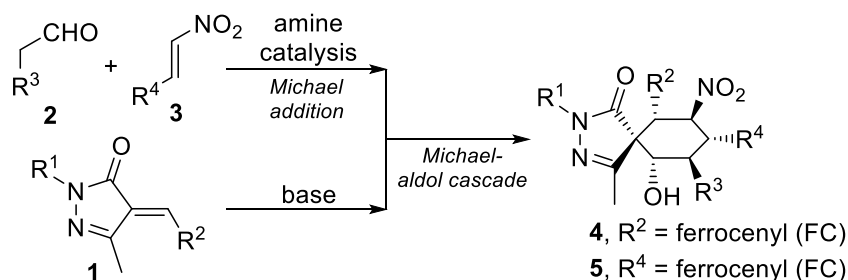

The reaction was carried out with saturated aldehyde **2** (0.8 mmol) and nitroolefin **3** (0.4 mmol) in the presence of catalyst **C1** (0.08 mmol) and acetic acid (0.08 mmol) in acetonitrile (4.0 mL) at room temperature for 2 h to afford the Michael adduct intermediate. When the reaction was complete, the pyrazolone substrate (0.3 mmol) and DBU (0.1 mmol in 1.0 mL MeCN) were added in one-pot. The reaction mixture was stirred at room temperature for a specified reaction time until the reaction completed (monitored by TLC). Then the reaction mixture was concentrated and the residue was purified by flash chromatography on silica gel to give the spirocyclic pyrazolone-ferrocene derivate.

### (5*S*,6*S*,7*R*,8*S*,9*S*,10*S*)-1,7-dimethyl-3,8-diphenyl-10-ferrocenyl-9-nitro-6-hydroxyl-2,3-diazaspiro[4.5]dec-1-ene-4-one

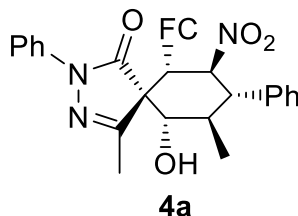

Prepared according to the general procedure using (*E*)-(2-nitrovinyl) benzene **3a** (59.66 mg, 0.40 mmol, 1.0 equiv), propionaldehyde **2a** (46.46 mg, 0.8 mmol, 2 equiv) and (*Z*)-4-ferrocenylidene-5-methyl-2-phenyl-2,4-dihydro-3H-pyrazol-3-one **1a** (111.07 mg, 0.30 mmol, 0.75 equiv). Purification of the crude product via column chromatography delivered **4a** as an orange solid with 65% yield (116.8 mg). The diastereomeric ratio was determined to be >20:1 by crude <sup>1</sup>H-NMR analysis, and the enantiomeric excess of the major product was determined to be 94% by chiral HPLC analysis on Chiralpak AD-H column (10% 2-propanol/*n*-hexane, 1 mL/min, UV 254 nm), *t*<sub>major</sub> = 13.45 min, *t*<sub>minor</sub> = 8.08 min; [ $\alpha$ ]<sub>D</sub><sup>20</sup> = -45.1 (*c* = 0.21 in CH<sub>2</sub>Cl<sub>2</sub>); m.p. 118-121 °C.

*NMR and HRMS data for the product 4a:*

**<sup>1</sup>H NMR (400 MHz, CDCl<sub>3</sub>):** δ (ppm): 7.63 (br s, 1H), 7.51 - 7.43 (m, 3H), 7.35 - 7.28 (m, 4H), 7.17 - 7.12 (m, 1H), 7.05 (br s, 1H), 5.78 (t, *J* = 10.8 Hz, 1H), 4.15 (dd, *J* = 3.6, 1.2 Hz, 1H), 4.02 - 3.99 (m, 7H), 3.86 (dd, *J* = 3.6, 1.2 Hz, 1H), 3.74 (dd, *J* = 9.6, 6.4 Hz, 1H), 3.57 (d, *J* = 11.2 Hz, 1H), 2.96 - 2.93 (m, 2H), 2.32 (s, 3H), 1.67 (d, *J* = 6.4 Hz, 1H), 0.84 (d, *J* = 6.0 Hz, 3H).

**<sup>13</sup>C NMR (100 MHz, CDCl<sub>3</sub>):** δ (ppm): 172.0 , 159.8 , 137.7 , 137.0 , 128.6 , 128.2 , 125.6 , 120.0 , 88.5 , 81.5 , 75.4 , 69.8 , 67.8 , 67.3 , 66.1 , 66.0 , 65.6 , 54.2 , 42.3 , 35.5 , 16.0 , 13.9 .

**HRMS (ESI):** *m/z* calculated for C<sub>32</sub>H<sub>31</sub>FeN<sub>3</sub>O<sub>4</sub>Na<sup>+</sup>: 600.1556, found 600.1564.

**(5*S*,6*S*,7*R*,8*S*,9*S*,10*S*)-1,7-dimethyl-3-(2-chlorophenyl)-8-phenyl-10-ferrocenyl-9-nitro-6-hydroxyl-2,3-diazaspiro[4.5]dec-1-ene-4-one**

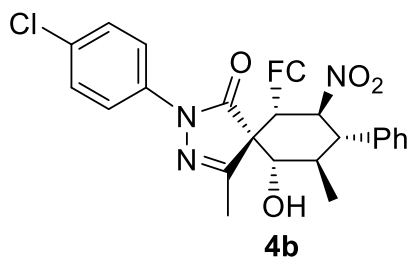

Prepared according to the general procedure using (*E*)-(2-nitrovinyl) benzene **3a** (59.66 mg, 0.40 mmol, 1.0 equiv), propionaldehyde **2a** (46.46 mg, 0.8 mmol, 2 equiv) and (*Z*)-4-ferrocenyldiene-5-methyl-2-(2-chlorophenyl)-2,4-dihydro-3H-pyrazol-3-one **1b** (121.40 mg, 0.30 mmol, 0.75 equiv). Purification of the crude product via column chromatography delivered **4b** as a yellow solid with 58% yield (110.9 mg). The diastereomeric ratio was determined to be >20:1 by crude <sup>1</sup>H-NMR analysis, and the enantiomeric excess of the major product was determined to be 93% by chiral HPLC analysis on Chiralpak IC-H column (10% 2-propanol/*n*-hexane, 1 mL/min, UV 254 nm), *t*<sub>major</sub> = 22.97 min, *t*<sub>minor</sub> = 38.22 min; [α]<sub>D</sub><sup>20</sup> = -21.7 (*c* = 0.21 in CH<sub>2</sub>Cl<sub>2</sub>); m.p. >185°C.

*NMR and HRMS data for the product 4b:*

**<sup>1</sup>H NMR (400 MHz, CDCl<sub>3</sub>):** δ (ppm): 7.58 (br s, 1H), 7.41 (dd, *J* = 8.0, 1.2 Hz, 2H), 7.34 - 7.27 (m, 2H), 7.26 (s, 0H), 7.25 - 7.19 (m, 2H), 7.05 (br s, 1H), 6.83 (dd, *J* = 7.6, 2.0 Hz, 1H), 5.78 (t, *J* = 10.8 Hz, 1H), 4.22 - 4.21 (m, 1H), 4.20 - 4.18 (m, 1H), 4.17 - 4.16 (m, 1H), 4.04 (s, 5H), 3.96 - 3.95(m,

1H), 3.76 (dd,  $J = 9.6, 7.6$  Hz, 1H), 3.64 (d,  $J = 11.2$  Hz, 1H), 2.95 (t,  $J = 11.6$  Hz, 1H), 2.92 - 2.85 (m, 1H), 2.34 (s, 3H), 1.68 (d,  $J = 7.6$  Hz, 1H), 0.86 (d,  $J = 6.0$  Hz, 3H).

**$^{13}\text{C}$  NMR (100 MHz,  $\text{CDCl}_3$ ):**  $\delta$  (ppm): 172.2, 160.0, 137.7, 131.7, 133.9, 130.2, 129.9, 128.8, 128.1, 127.4, 88.5, 82.0, 75.4, 70.0, 67.8, 67.5, 66.7, 65.6, 65.3, 54.3, 42.2, 35.6, 16.0, 14.0.

**HRMS (ESI):**  $m/z$  calculated for  $\text{C}_{32}\text{H}_{30}\text{ClFeN}_3\text{O}_4\text{Na}^+$ : 634.1172, found 634.1179.

**(5*S*,6*S*,7*R*,8*S*,9*S*,10*S*)-1,7-dimethyl-3-(4-fluorophenyl)-8-phenyl-10-ferrocenyl-9-nitro-6-hydroxyl-2,3-diazaspiro[4.5]dec-1-ene-4-one**

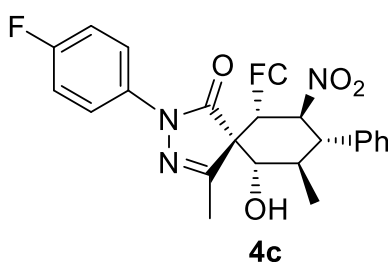

Prepared according to the general procedure using (*E*)-(2-nitrovinyl) benzene **3a** (59.66 mg, 0.40 mmol, 1.0 equiv), propionaldehyde **2a** (46.46 mg, 0.8 mmol, 2 equiv) and (*Z*)-4-ferrocenylidene-5-methyl-2-(4-fluorophenyl)-2,4-dihydro-3H-pyrazol-3-one **1c** (116.47 mg, 0.30 mmol, 0.75 equiv). Purification of the crude product via column chromatography delivered **4c** as a yellow solid with 67% yield (124.4 mg). The diastereomeric ratio was determined to be >20:1 by crude  $^1\text{H}$ -NMR analysis, and the enantiomeric excess of the major product was determined to be >99% by chiral HPLC analysis on Chiralpak AD-H column (10% 2-propanol/*n*-hexane, 1 mL/min, UV 254 nm),  $t_{\text{major}} = 11.98$  min,  $t_{\text{minor}} = 8.16$  min;  $[\alpha]_{\text{D}}^{20} = -60.2$  ( $c = 0.24$  in  $\text{CH}_2\text{Cl}_2$ ); m.p. 135-137°C.

*NMR and HRMS data for the product 4c:*

**$^1\text{H}$  NMR (400 MHz,  $\text{CDCl}_3$ ):**  $\delta$  (ppm): 7.60 (br s, 1H), 7.48 - 7.38 (m, 3H), 7.37 - 7.28 (m, 2H), 7.10 - 6.94 (m, 3H), 5.75 (t,  $J = 11.2$  Hz, 1H), 4.12 (dd,  $J = 3.6, 2.0$  Hz, 1H), 4.01 - 3.99 (m, 7H), 3.85 - 3.84 (m, 1H), 3.72 (dd,  $J = 9.6, 6.0$  Hz, 1H), 3.56 (d,  $J = 11.2$  Hz, 1H), 2.97 - 2.89 (m, 2H), 2.29 (s, 3H), 1.86 (d,  $J = 6.4$  Hz, 1H), 0.83 (d,  $J = 5.6$  Hz, 3H).

**<sup>13</sup>C NMR (100 MHz, CDCl<sub>3</sub>):** δ (ppm): 170.1 , 158.4 (d, *J*<sub>CF</sub> = 243.6 Hz), 158.1 , 135.8 , 131.3 (d, *J*<sub>CF</sub> = 2.9 Hz), 126.3 , 120.0 , 120.0 , 113.6 , 113.4 , 86.6 , 79.6 , 73.4 , 68.0 , 65.9 , 65.4 , 64.2 , 64.1 , 63.7 , 52.3 , 40.4 , 33.6 , 14.1 , 12.0 .

**HRMS (ESI):** *m/z* calculated for C<sub>32</sub>H<sub>30</sub>FFeN<sub>3</sub>O<sub>4</sub>Na<sup>+</sup>: 618.1462, found 618.1464.

**(5*S*,6*S*,7*R*,8*S*,9*S*,10*S*)-1,7-dimethyl-3-(*p*-tolyl)-8-phenyl-10-ferrocenyl-9-nitro-6-hydroxyl-2,3-diazaspiro[4.5]dec-1-ene-4-one**

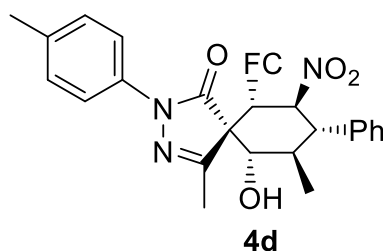

Prepared according to the general procedure using (*E*)-(2-nitrovinyl) benzene **3a** (59.66 mg, 0.40 mmol, 1.0 equiv), propionaldehyde **2a** (46.46 mg, 0.8 mmol, 2 equiv) and (*Z*)-4-ferrocenyldiene-5-methyl-2-(*p*-tolyl)-2,4-dihydro-3H-pyrazol-3-one **1d** (115.28 mg, 0.30 mmol, 0.75 equiv). Purification of the crude product via column chromatography delivered **4d** as an orange solid with 57% yield (101.6 mg). The diastereomeric ratio was determined to be >20:1 by crude <sup>1</sup>H-NMR analysis, and the enantiomeric excess of the major product was determined to be 95% by chiral HPLC analysis on Chiralpak AD-H column (10% 2-propanol/*n*-hexane, 1 mL/min, UV 254 nm), *t*<sub>major</sub> = 13.40 min, *t*<sub>minor</sub> = 8.77 min; [ $\alpha$ ]<sub>D</sub><sup>20</sup> = -38.1 (*c* = 0.23 in CH<sub>2</sub>Cl<sub>2</sub>); m.p. 126-128 °C.

*NMR and HRMS data for the product 4d:*

**<sup>1</sup>H NMR (400 MHz, CDCl<sub>3</sub>):** δ (ppm): 7.62 (br s, 1H), 7.46 (br s, 1H), 7.36 - 7.29 (m, 4H), 7.13 - 7.09 (m, 2H), 7.05 (br s, 1H), 5.78 (t, *J* = 10.8 Hz, 1H), 4.15 - 4.14 (m, 1H), 4.04 - 3.99 (m, 7H), 3.86 - 3.85 (m, 1H), 3.73 (dd, *J* = 10.0, 6.8 Hz, 1H), 3.56 (d, *J* = 11.2 Hz, 1H), 2.98 - 2.90 (m, 2H), 2.31 (s, 3H), 2.30 (s, 3H), 1.67 (d, *J* = 6.8 Hz, 1H), 0.84 (d, *J* = 5.6 Hz, 3H).

**<sup>13</sup>C NMR (100 MHz, CDCl<sub>3</sub>):** δ (ppm): 171.8 , 159.6 , 137.7 , 135.4 , 134.6 , 129.2 , 128.1, 120.1 , 88.6 , 81.6 , 75.4 , 69.8 , 67.8 , 67.3, 66.1 , 66.0 , 65.6 , 54.2 , 42.3 , 35.5 , 21.0 , 16.0 , 13.9 .

**HRMS (ESI):** *m/z* calculated for C<sub>33</sub>H<sub>34</sub>FeN<sub>3</sub>O<sub>4</sub><sup>+</sup>: 592.1893, found 592.1895.

**(5*S*,6*S*,7*R*,8*S*,9*S*,10*S*)-1,7-dimethyl-3-(4-methoxyphenyl)-8-phenyl-10-ferrocenyl-9-nitro-6-hydroxyl-2,3-diazaspiro[4.5]dec-1-ene-4-one**

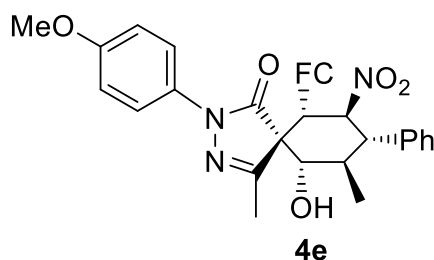

Prepared according to the general procedure using (*E*)-(2-nitrovinyl) benzene **3a** (59.66 mg, 0.40 mmol, 1.0 equiv), propionaldehyde **2a** (46.46 mg, 0.8 mmol, 2 equiv) and (*Z*)-4-ferrocenylidene-5-methyl-2-(4-methoxyphenyl)-2,4-dihydro-3H-pyrazol-3-one **1e** (120.08 mg, 0.30 mmol, 0.75 equiv). Purification of the crude product via column chromatography delivered **4e** as a yellow solid with 61% yield (114.4 mg). The diastereomeric ratio was determined to be >20:1 by crude <sup>1</sup>H-NMR analysis, and the enantiomeric excess of the major product was determined to be >99% by chiral HPLC analysis on Chiralpak AD-H column (10% 2-propanol/*n*-hexane, 1 mL/min, UV 254 nm), *t*<sub>major</sub> = 21.02 min, *t*<sub>minor</sub> = 12.06 min; [ $\alpha$ ]<sub>D</sub><sup>20</sup> = -46.5 (*c* = 0.23 in CH<sub>2</sub>Cl<sub>2</sub>); m.p. 142-144 °C.

*NMR and HRMS data for the product 4e:*

**<sup>1</sup>H NMR (400 MHz, CDCl<sub>3</sub>):**  $\delta$  (ppm): 7.62 (br s, 1H), 7.45 (br s, 1H), 7.36 - 7.28 (m, 4H), 7.04 (br s, 1H), 6.84 - 6.81 (m, 2H), 5.78 (t, *J* = 11.2 Hz, 1H), 4.16 - 4.15 (m, 1H), 4.05 - 4.02 (m, 2H), 4.01 (s, 5H), 3.87 - 3.86 (m, 1H), 3.78 (s, 3H), 3.73 (dd, *J* = 9.6, 6.4 Hz, 1H), 3.56 (d, *J* = 11.2 Hz, 1H), 2.98 - 2.90 (m, 2H), 2.30 (s, 3H), 1.71 (d, *J* = 6.4 Hz, 1H), 0.84 (d, *J* = 5.6 Hz, 3H).

**<sup>13</sup>C NMR (100 MHz, CDCl<sub>3</sub>):**  $\delta$  (ppm): 171.8, 159.6, 157.5, 137.7, 130.1, 128.1, 122.2, 113.8, 88.5, 81.6, 75.4, 69.9, 67.8, 67.3, 66.1, 65.9, 65.6, 55.5, 54.2, 42.3, 35.5, 16.0, 13.9.

**HRMS (ESI):** *m/z* calculated for C<sub>33</sub>H<sub>33</sub>FeN<sub>3</sub>O<sub>5</sub>Na<sup>+</sup>: 630.1662, found 630.1662.

**(5*S*,6*S*,7*R*,8*S*,9*S*,10*S*)-1-methyl-7-ethyl-3,8-diphenyl-10-ferrocenyl-9-nitro-6-hydroxyl-2,3-diazaspiro[4.5]dec-1-ene-4-one**

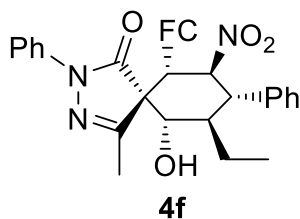

Prepared according to the general procedure using (*E*)-(2-nitrovinyl) benzene **3a** (59.66 mg, 0.40 mmol, 1.0 equiv), butyraldehyde **2b** (57.69 mg, 0.8 mmol, 2 equiv) and (*Z*)-4-ferrocenylidene-5-methyl-2-phenyl-2,4-dihydro-3H-pyrazol-3-one **1a** (111.07 mg, 0.30 mmol, 0.75 equiv). Purification of the crude product via column chromatography delivered **4f** as an orange solid with 69% yield (127.7 mg). The diastereomeric ratio was determined to be >20:1 by crude <sup>1</sup>H-NMR analysis, and the enantiomeric excess of the major product was determined to be 95% by chiral HPLC analysis on Chiralpak AD-H column (10% 2-propanol/*n*-hexane, 1 mL/min, UV 254 nm), *t*<sub>major</sub> = 9.11 min, *t*<sub>minor</sub> = 6.08 min; [α]<sub>D</sub><sup>20</sup> = -38.6 (*c* = 0.21 in CH<sub>2</sub>Cl<sub>2</sub>); m.p. 126-128 °C.

*NMR and HRMS data for the product 4f:*

**<sup>1</sup>H NMR (400 MHz, CDCl<sub>3</sub>):** δ (ppm): 7.64 (br s, 1H), 7.50 - 7.43 (m, 3H), 7.35 - 7.27 (m, 4H), 7.17 - 7.12 (m, 1H), 7.07 (br s, 1H), 5.76 (t, *J* = 11.2 Hz, 1H), 4.14 - 4.13 (m, 1H), 4.02 - 3.99 (m, 7H), 3.99 - 3.94 (m, 1H), 3.86 - 3.85 (m, 1H), 3.54 (d, *J* = 11.2 Hz, 1H), 3.15 (dd, *J* = 12.4, 11.2 Hz, 1H), 3.05 - 2.97 (m, 1H), 2.33 (s, 3H), 1.56 (d, *J* = 6.4 Hz, 1H), 1.53 - 1.45 (m, 1H), 1.24 - 1.17 (m, 1H), 0.77 (t, *J* = 7.6 Hz, 3H).

**<sup>13</sup>C NMR (100 MHz, CDCl<sub>3</sub>):** δ (ppm): 172.1, 159.9, 137.5, 137.0, 128.6, 128.1, 125.6, 120.0, 89.0, 81.5, 71.7, 69.8, 67.8, 67.3, 66.1, 66.0, 65.5, 50.4, 42.2, 39.0, 20.0, 14.0, 7.5.

**HRMS (ESI):** *m/z* calculated for C<sub>33</sub>H<sub>33</sub>FeN<sub>3</sub>O<sub>4</sub>Na<sup>+</sup>: 614.1713, found 614.1722.

**(5*S*,6*S*,7*R*,8*S*,9*S*,10*S*)-1-methyl-7-propyl-3,8-diphenyl-10-ferrocenyl-9-nitro-6-hydroxy-2,3-diazaspiro[4.5]dec-1-ene-4-one**

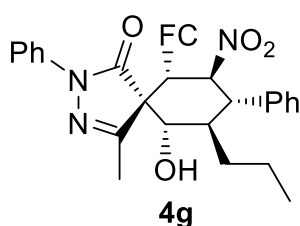



Prepared according to the general procedure using (*E*)-(2-nitrovinyl) benzene **3a** (59.66 mg, 0.40 mmol, 1.0 equiv), butyraldehyde **2c** (68.91 mg, 0.8 mmol, 2 equiv) and (*Z*)-4-ferrocenylidene-5-methyl-2-phenyl-2,4-dihydro-3H-pyrazol-3-one **1a** (111.07 mg, 0.30 mmol, 0.75 equiv). Purification of the crude product via column chromatography delivered **4g** as an orange solid with 62% yield (112.0 mg). The diastereomeric ratio was determined to be >20:1 by crude <sup>1</sup>H-NMR analysis, and the enantiomeric excess of the major product was determined to be 97% by chiral HPLC analysis on Chiralpak AD-H column (10% 2-propanol/*n*-hexane, 1 mL/min, UV 254 nm), *t*<sub>major</sub> = 7.04 min, *t*<sub>minor</sub> = 5.81 min; [ $\alpha$ ]<sub>D</sub><sup>20</sup> = -34.9 (*c* = 0.21 in CH<sub>2</sub>Cl<sub>2</sub>); m.p. 110-113 °C.

*NMR and HRMS data for the product 4g:*

**<sup>1</sup>H NMR (400 MHz, CDCl<sub>3</sub>):**  $\delta$  (ppm): 7.64 (br s, 1H), 7.52 - 7.43 (m, 3H), 7.36 - 7.28 (m, 4H), 7.14 (tt, *J* = 7.2, 1.2 Hz, 1H), 7.05 (br s, 1H), 5.76 (t, *J* = 11.2 Hz, 1H), 4.14 (dd, *J* = 3.6, 2.0 Hz, 1H), 4.00 (s, 7H), 3.93 (d, *J* = 10.4 Hz, 1H), 3.85 (dd, *J* = 3.6, 1.6 Hz, 1H), 3.53 (d, *J* = 11.2 Hz, 1H), 3.13 (t, *J* = 12.0 Hz, 1H), 2.96 (tt, *J* = 11.2, 3.2 Hz, 1H), 2.30 (s, 3H), 1.75 (br s, 1H), 1.43 - 1.25 (m, 2H), 1.17 - 1.07 (m, 2H), 0.69 (t, *J* = 5.6 Hz, 3H).

**<sup>13</sup>C NMR (100 MHz, CDCl<sub>3</sub>):**  $\delta$  (ppm): 172.1, 159.9, 137.6, 137.0, 128.6, 128.1, 125.6, 120.0, 88.9, 81.6, 72.7, 69.8, 67.8, 67.3, 66.2, 66.0, 65.5, 51.4, 42.2, 38.9, 30.4, 17.2, 14.4, 14.0.

**HRMS (ESI):** *m/z* calculated for C<sub>34</sub>H<sub>36</sub>FeN<sub>3</sub>O<sub>4</sub><sup>+</sup>: 606.2050, found 606.2047.

**(5*S*,6*S*,7*R*,8*S*,9*S*,10*S*)-1,7-dimethyl-3-phenyl-8-(3-chlorophenyl)-10-ferrocenyl-9-nitro-6-hydroxyl-2,3-diazaspiro[4.5]dec-1-ene-4-one**

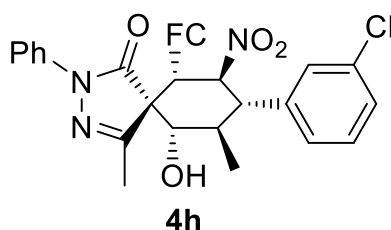

Prepared according to the general procedure using (*E*)-1-chloro-3-(2-nitrovinyl) benzene **3h** (73.44 mg, 0.40 mmol, 1.0 equiv), propionaldehyde **2a** (46.46 mg, 0.8 mmol, 2 equiv) and (*Z*)-4-ferrocenylidene-5-methyl-2-phenyl-2,4-dihydro-3H-pyrazol-3-one **1a** (111.07 mg, 0.30 mmol, 0.75 equiv). Purification of the crude product via column chromatography delivered **4h** as an orange solid

with 63% yield (116.2 mg). The diastereomeric ratio was determined to be >20:1 by crude  $^1\text{H}$ -NMR analysis, and the enantiomeric excess of the major product was determined to be 93% by chiral HPLC analysis on Chiralpak AD-H column (10% 2-propanol/*n*-hexane, 1 mL/min, UV 254 nm),  $t_{\text{major}} = 12.41$  min,  $t_{\text{minor}} = 7.47$  min;  $[\alpha]_{\text{D}}^{20} = -52.2$  ( $c = 0.25$  in  $\text{CH}_2\text{Cl}_2$ ); m.p. 123-125°C.

*NMR and HRMS data for the product 4h:*

**$^1\text{H}$  NMR (400 MHz,  $\text{CDCl}_3$ ):**  $\delta$  (ppm): 7.65 - 7.50 (m, 1H), 7.50 - 7.36 (m, 3H), 7.34 - 7.29 (m, 3H), 7.18 - 7.12 (m, 1H), 7.10 - 6.91 (m, 1H), 5.76 (br s, 1H), 4.15 (s, 1H), 4.04 - 3.99 (m, 7H), 3.86 (dd,  $J = 3.6, 1.6$  Hz, 1H), 3.72 (dd,  $J = 10.0, 6.4$  Hz, 1H), 3.55 (d,  $J = 11.2$  Hz, 1H), 2.93-2.91 (m, 2H), 2.31 (s, 3H), 1.67 (d,  $J = 6.4$  Hz, 1H), 0.87 - 0.83 (d,  $J = 6.4$  Hz, 3H).

**$^{13}\text{C}$  NMR (100 MHz,  $\text{CDCl}_3$ ):**  $\delta$  (ppm): 171.9, 159.6, 139.8, 137.0, 128.6, 125.7, 120.0, 88.2, 81.3, 75.2, 69.9, 67.9, 67.4, 66.0, 65.6, 53.8, 42.3, 30.9, 16.0, 13.9.

**HRMS (ESI):**  $m/z$  calculated for  $\text{C}_{32}\text{H}_{31}\text{ClFeN}_3\text{O}_4^+$ : 612.1347, found 612.1332.

**(5*S*,6*S*,7*R*,8*S*,9*S*,10*S*)-1,7-dimethyl-3-phenyl-8-(4-chlorophenyl)-10-ferrocenyl-9-nitro-6-hydroxyl-2,3-diazaspiro[4.5]dec-1-ene-4-one**

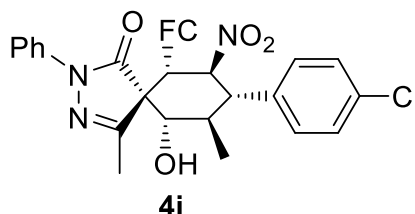

Prepared according to the general procedure using (*E*)-1-chloro-4-(2-nitrovinyl) benzene **3i** (73.44 mg, 0.40 mmol, 1.0 equiv), propionaldehyde **2a** (46.46 mg, 0.8 mmol, 2 equiv) and (*Z*)-4-ferrocenylidene-5-methyl-2-phenyl-2,4-dihydro-3H-pyrazol-3-one **1a** (111.07 mg, 0.30 mmol, 0.75 equiv). Purification of the crude product via column chromatography delivered **4i** as a yellow solid with 62% yield (114.1 mg). The diastereomeric ratio was determined to be >20:1 by crude  $^1\text{H}$ -NMR analysis, and the enantiomeric excess of the major product was determined to be 93% by chiral HPLC analysis on Chiralpak AD-H column (10% 2-propanol/*n*-hexane, 1 mL/min, UV 254 nm),  $t_{\text{major}} = 10.84$  min,  $t_{\text{minor}} = 8.24$  min;  $[\alpha]_{\text{D}}^{20} = -80.97$  ( $c = 0.24$  in  $\text{CH}_2\text{Cl}_2$ ); decomp. >169°C.

*NMR and HRMS data for the product 4i:*

**<sup>1</sup>H NMR (400 MHz, CDCl<sub>3</sub>):** δ (ppm): 7.56 (br s, 1H), 7.50 - 7.39 (m, 3H), 7.34 - 7.27 (m, 3H), 7.15 (tt, *J* = 7.2, 1.2 Hz, 1H), 6.99 (br s, 1H), 5.75 (t, *J* = 10.8 Hz, 1H), 4.13 (dd, *J* = 3.6, 1.6 Hz, 1H), 4.02 (t, *J* = 2.0 Hz, 2H), 4.00 (s, 5H), 3.86 (dd, *J* = 3.6, 1.6 Hz, 1H), 3.72 (dd, *J* = 9.6, 6.4 Hz, 1H), 3.55 (d, *J* = 11.2 Hz, 1H), 2.97 - 2.86 (m, 2H), 2.31 (s, 3H), 1.68 (d, *J* = 6.4 Hz, 1H), 0.84 (d, *J* = 6.0 Hz, 3H).

**<sup>13</sup>C NMR (100 MHz, CDCl<sub>3</sub>):** δ (ppm): 171.9 , 159.6 , 137.0 , 136.3 , 134.1 , 128.6 , 125.7 , 120.0 , 88.4 , 81.3 , 75.2 , 69.9 , 67.9 , 67.4 , 66.0 , 66.0 , 65.6 , 53.5 , 42.3 , 35.5 , 16.0 , 13.9 .

**HRMS (ESI):** *m/z* calculated for C<sub>32</sub>H<sub>31</sub>ClFeN<sub>3</sub>O<sub>4</sub><sup>+</sup>: 612.1347, found 612.1336.

**(5*S*,6*S*,7*R*,8*S*,9*S*,10*S*)-1,7-dimethyl-3-phenyl-8-(2,4-dichlorophenyl)-10-ferrocenyl-9-nitro-6-hydroxyl-2,3-diazaspiro[4.5]dec-1-ene-4-one**

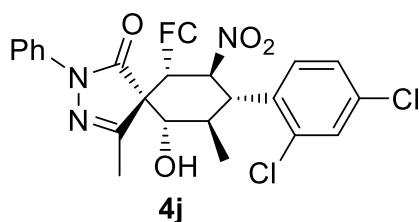

Prepared according to the general procedure using (*E*)-1,3-dichloro-4-(2-nitrovinyl) benzene **3j** (87.21 mg, 0.40 mmol, 1.0 equiv), propionaldehyde **2a** (46.46 mg, 0.8 mmol, 2 equiv) and (*Z*)-4-ferrocenylidene-5-methyl-2-phenyl-2,4-dihydro-3H-pyrazol-3-one **1a** (111.07 mg, 0.30 mmol, 0.75 equiv). Purification of the crude product via column chromatography delivered **4j** as a yellow solid with 54% yield (99.9 mg). The diastereomeric ratio was determined to be >20:1 by crude <sup>1</sup>H-NMR analysis, and the enantiomeric excess of the major product was determined to be 99% by chiral HPLC analysis on Chiralpak AD-H column (10% 2-propanol/*n*-hexane, 1 mL/min, UV 254 nm), *t*<sub>major</sub> = 12.70 min, *t*<sub>minor</sub> = 7.90 min; [α]<sub>D</sub><sup>20</sup> = -36.9 (*c* = 0.24 in CH<sub>2</sub>Cl<sub>2</sub>); m.p. 160-162 °C.

*NMR and HRMS data for the product 4j:*

**<sup>1</sup>H NMR (400 MHz, CDCl<sub>3</sub>):** δ (ppm): 7.65 (d, *J* = 8.4 Hz, 1H), 7.48 - 7.44 (m, 2H), 7.42 (d, *J* = 2.0 Hz, 1H), 7.38 (dd, *J* = 8.4, 2.0 Hz, 1H), 7.34 - 7.28 (m, 2H), 7.15 (tt, *J* = 7.6, 1.2 Hz, 1H), 5.79 (t, *J* = 11.2 Hz, 1H), 4.13 (dd, *J* = 3.6, 1.6 Hz, 1H), 4.04 - 4.02 (m, 2H), 4.01 (s, 5H), 3.89 - 3.77 (m, 3H),

3.61 (d,  $J = 11.2$  Hz, 1H), 2.80 (td,  $J = 11.2, 6.4$  Hz, 1H), 2.32 (s, 3H), 1.76 -1.74 (m, 1H), 0.87 (d,  $J = 6.4$  Hz, 3H).

**$^{13}\text{C}$  NMR (100 MHz,  $\text{CDCl}_3$ ):**  $\delta$  (ppm): 172.0 , 159.7 , 136.9 , 135.5 , 134.5 , 129.6 , 129.1 , 128.7 , 128.4 , 125.8 , 120.1 , 87.2 , 81.2 , 75.0 , 69.9 , 67.9 , 67.4 , 66.0 , 65.8 , 65.7 , 47.7 , 42.3 , 36.9 , 15.0 , 14.0 .

**HRMS (ESI):**  $m/z$  calculated for  $\text{C}_{32}\text{H}_{30}\text{Cl}_2\text{FeN}_3\text{O}_4^+$ : 646.0957, found 646.0958.

**(5*S*,6*S*,7*R*,8*S*,9*S*,10*S*)-1,7-dimethyl-3-phenyl-8-(3-bromophenyl)-10-ferrocenyl-9-nitro-6-hydroxyl-2,3-diazaspiro[4.5]dec-1-ene-4-one**

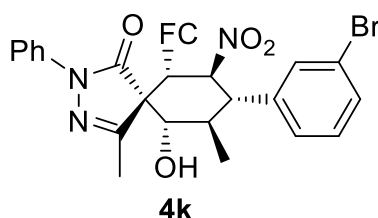

Prepared according to the general procedure using (*E*)-1-bromo-3-(2-nitrovinyl) benzene **3k** (87.21 mg, 0.40 mmol, 1.0 equiv), propionaldehyde **2a** (46.46 mg, 0.8 mmol, 2 equiv) and (*Z*)-4-ferrocenylidene-5-methyl-2-phenyl-2,4-dihydro-3H-pyrazol-3-one **1a** (111.07 mg, 0.30 mmol, 0.75 equiv). Purification of the crude product via column chromatography delivered **4k** as an orange solid with 60% yield (121.7 mg). The diastereomeric ratio was determined to be >20:1 by crude  $^1\text{H}$ -NMR analysis, and the enantiomeric excess of the major product was determined to be 92% by chiral HPLC analysis on Chiralpak AD-H column (10% 2-propanol/*n*-hexane, 1 mL/min, UV 254 nm),  $t_{\text{major}} = 12.28$  min,  $t_{\text{minor}} = 7.89$  min;  $[\alpha]_{\text{D}}^{20} = -65.14$  ( $c = 0.22$  in  $\text{CH}_2\text{Cl}_2$ ); m.p. 138-140°C.

*NMR and HRMS data for the product 4k:*

**$^1\text{H}$  NMR (400 MHz,  $\text{CDCl}_3$ ):**  $\delta$  (ppm): 7.79 - 7.43 (m, 4H), 7.33 - 7.28 (m, 2H), 7.24 - 7.12 (m, 2H), 6.99 (br s, 1H), 5.76 (br s, 1H), 4.19 - 3.97 (m, 8H), 3.86 (dd,  $J = 3.6, 1.2$  Hz, 1H), 3.72 (dd,  $J = 9.6, 6.4$  Hz, 1H), 3.55 (d,  $J = 11.2$  Hz, 1H), 2.91 (br s, 2H), 2.31 (s, 3H), 1.69 (d,  $J = 6.4$  Hz, 1H), 0.85 (d,  $J = 6.0$  Hz, 3H).

**$^{13}\text{C}$  NMR (100 MHz,  $\text{CDCl}_3$ ):**  $\delta$  (ppm): 171.9 , 159.6 , 140.1 , 137.0 , 128.6 , 125.7 , 120.0 , 100.0 , 88.2 , 81.3 , 75.2 , 69.9 , 67.9 , 67.4 , 66.0 , 65.6 , 53.8 , 42.3 , 30.9 , 16.0 , 13.9 .

**HRMS (ESI):**  $m/z$  calculated for  $C_{32}H_{30}BrFeN_3O_4Na^+$ : 678.0661, found 678.0670.

**(5*S*,6*S*,7*R*,8*S*,9*S*,10*S*)-1,7-dimethyl-3-phenyl-8-(4-fluorophenyl)-10-ferrocenyl-9-nitro-6-hydroxyl-2,3-diazaspiro[4.5]dec-1-ene-4-one**

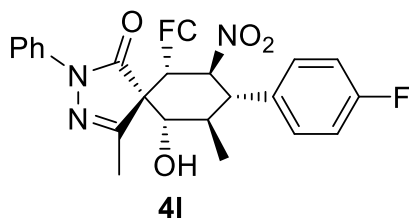

Prepared according to the general procedure using (*E*)-1-fluoro-4-(2-nitrovinyl) benzene **3I** (66.86 mg, 0.40 mmol, 1.0 equiv), propionaldehyde **2a** (46.46 mg, 0.8 mmol, 2 equiv) and (*Z*)-4-ferrocenylidene-5-methyl-2-phenyl-2,4-dihydro-3H-pyrazol-3-one **1a** (111.07 mg, 0.30 mmol, 0.75 equiv). Purification of the crude product via column chromatography delivered **4I** as a yellow solid with 64% yield (119.4 mg). The diastereomeric ratio was determined to be >20:1 by crude <sup>1</sup>H-NMR analysis, and the enantiomeric excess of the major product was determined to be 98% by chiral HPLC analysis on Chiralpak AD-H column (10% 2-propanol/*n*-hexane, 1 mL/min, UV 254 nm),  $t_{\text{major}}=7.93$  min,  $t_{\text{minor}}=10.61$  min;  $[\alpha]_D^{20}=-46.5$  ( $c=0.23$  in  $CH_2Cl_2$ ); m.p. 137-138°C.

*NMR and HRMS data for the product 4I:*

**<sup>1</sup>H NMR (400 MHz, CDCl<sub>3</sub>):**  $\delta$  (ppm): 7.60 (br s, 1H), 7.50 - 7.44 (m, 2H), 7.34 - 7.28 (m, 2H), 7.15 (tt,  $J=7.6, 1.2$  Hz, 2H), 7.00 (br s, 2H), 5.74 (t,  $J=10.8$  Hz, 1H), 4.13 (dd,  $J=3.6, 1.6$  Hz, 1H), 4.02 (t,  $J=1.6$  Hz, 2H), 4.01 (s, 5H), 3.86 (dd,  $J=3.6, 1.6$  Hz, 1H), 3.73 (dd,  $J=10.0, 6.0$  Hz, 1H), 3.55 (d,  $J=11.2$  Hz, 1H), 2.98 - 2.87 (m, 2H), 2.31 (s, 3H), 1.68 (d,  $J=6.4$  Hz, 1H), 0.84 (d,  $J=5.6$  Hz, 3H).

**<sup>13</sup>C NMR (100 MHz, CDCl<sub>3</sub>):**  $\delta$  (ppm): 172.0, 162.5 (d,  $J_{CF}=245.5$  Hz), 159.8, 137.0, 133.5 (d,  $J_{CF}=3.0$  Hz), 128.6, 125.7, 120.0, 88.6, 81.4, 75.2, 69.9, 67.8, 67.4, 66.0, 66.0, 65.6, 53.4, 42.3, 35.6, 15.9, 13.9.

**HRMS (ESI):**  $m/z$  calculated for  $C_{32}H_{30}FFeN_3O_4Na^+$ : 618.1462, found 618.1474.

**(5*S*,6*S*,7*R*,8*S*,9*S*,10*S*)-1,7-dimethyl-3-phenyl-8-(*p*-tolyl)-10-ferrocenyl-9-nitro-6-hydroxyl-2,3-diazaspiro[4.5]dec-1-ene-4-one**

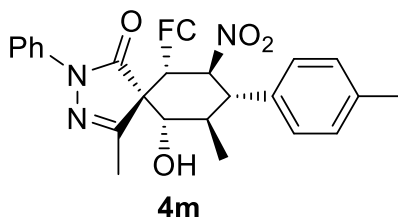

Prepared according to the general procedure using (*E*)-1-methyl-4-(2-nitrovinyl) benzene **3m** (65.27 mg, 0.40 mmol, 1.0 equiv), propionaldehyde **2a** (46.46 mg, 0.8 mmol, 2 equiv) and (*Z*)-4-ferrocenylidene-5-methyl-2-phenyl-2,4-dihydro-3H-pyrazol-3-one **1a** (111.07 mg, 0.30 mmol, 0.75 equiv). Purification of the crude product via column chromatography delivered **4m** as an orange solid with 70% yield (124.7 mg). The diastereomeric ratio was determined to be >20:1 by crude <sup>1</sup>H-NMR analysis, and the enantiomeric excess of the major product was determined to be 98% by chiral HPLC analysis on Chiralpak AD-H column (10% 2-propanol/*n*-hexane, 1 mL/min, UV 254 nm), *t*<sub>major</sub> = 9.61 min, *t*<sub>minor</sub> = 7.90 min; [ $\alpha$ ]<sub>D</sub><sup>20</sup> = -52.9 (*c* = 0.20 in CH<sub>2</sub>Cl<sub>2</sub>); decomp. >171 °C.

*NMR and HRMS data for the product 4m:*

**<sup>1</sup>H NMR (400 MHz, CDCl<sub>3</sub>):**  $\delta$  (ppm): 7.54 - 7.45 (m, 3H), 7.32 - 7.27 (m, 3H), 7.17 - 7.06 (m, 2H), 6.93 (br s, 1H), 5.75 (t, *J* = 10.8 Hz, 1H), 4.14 (dd, *J* = 3.6, 2.0 Hz, 1H), 4.00 (s, 7H), 3.85 (dd, *J* = 3.6, 1.6 Hz, 1H), 3.72 (d, *J* = 8.4 Hz, 1H), 3.55 (d, *J* = 11.2 Hz, 1H), 2.94 - 2.85 (m, 2H), 2.35 (s, 3H), 2.31 (s, 3H), 1.76 (s, 1H), 0.84 (d, *J* = 5.6 Hz, 3H).

**<sup>13</sup>C NMR (100 MHz, CDCl<sub>3</sub>):**  $\delta$  (ppm): 172.0, 159.8, 137.8, 137.0, 134.6, 128.6, 125.6, 120.0, 88.6, 81.6, 75.4, 69.8, 67.8, 67.3, 66.1, 66.0, 65.6, 53.8, 42.3, 35.5, 21.2, 16.0, 13.9.

**HRMS (ESI):** *m/z* calculated for C<sub>33</sub>H<sub>34</sub>FeN<sub>3</sub>O<sub>4</sub><sup>+</sup>: 592.1893, found 592.1895.

**(5*S*,6*S*,7*R*,8*S*,9*S*,10*S*)-1,7-dimethyl-3-phenyl-8-(4-methoxyphenyl)-10-ferrocenyl-9-nitro-6-hydroxyl-2,3-diazaspiro[4.5]dec-1-ene-4-one**

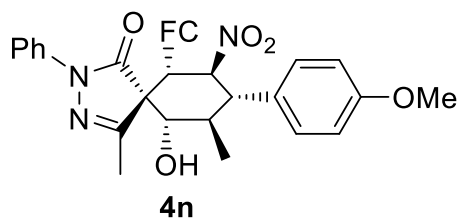

Prepared according to the general procedure using (*E*)-1-methyl-4-(2-nitrovinyl) benzene **3m** (71.67 mg, 0.40 mmol, 1.0 equiv), propionaldehyde **2a** (46.46 mg, 0.8 mmol, 2 equiv) and (*Z*)-4-ferrocenylidene-5-methyl-2-phenyl-2,4-dihydro-3H-pyrazol-3-one **1a** (111.07 mg, 0.30 mmol, 0.75 equiv). Purification of the crude product via column chromatography delivered **4n** as an orange solid with 69% yield (125.9 mg). The diastereomeric ratio was determined to be >20:1 by crude <sup>1</sup>H-NMR analysis, and the enantiomeric excess of the major product was determined to be 94% by chiral HPLC analysis on Chiralpak AD-H column (10% 2-propanol/*n*-hexane, 1 mL/min, UV 254 nm), *t*<sub>major</sub> = 15.56 min, *t*<sub>minor</sub> = 10.59 min; [ $\alpha$ ]<sub>D</sub><sup>20</sup> = -67.3 (*c* = 0.23 in CH<sub>2</sub>Cl<sub>2</sub>); decomp. >176°C.

*NMR and HRMS data for the product 4n:*

**<sup>1</sup>H NMR (400 MHz, CDCl<sub>3</sub>):**  $\delta$  (ppm): 7.56 - 7.44 (m, 3H), 7.33 - 7.27 (m, 2H), 7.14 (tt, *J* = 7.2, 1.2 Hz, 1H), 6.99 (br s, 2H), 6.80 (br s, 1H), 5.73 (t, *J* = 11.2 Hz, 1H), 4.14 (dd, *J* = 3.6, 1.6 Hz, 1H), 4.01 (s, 7H), 3.85 (dd, *J* = 3.6, 1.6 Hz, 1H), 3.81 (s, 3H), 3.73 - 3.69 (m, 1H), 3.54 (d, *J* = 11.2 Hz, 1H), 2.91 - 2.84 (m, 2H), 2.30 (s, 3H), 1.80 (d, *J* = 6.4 Hz, 1H), 0.83 (d, *J* = 5.6 Hz, 3H).

**<sup>13</sup>C NMR (100 MHz, CDCl<sub>3</sub>):**  $\delta$  (ppm): 172.0, 159.8, 159.3, 137.0, 129.6, 128.6, 125.6, 120.0, 88.7, 81.6, 75.4, 69.8, 67.8, 67.3, 66.1, 66.0, 65.5, 55.2, 53.4, 42.2, 35.6, 16.0, 13.9.

**HRMS (ESI):** *m/z* calculated for C<sub>33</sub>H<sub>34</sub>FeN<sub>3</sub>O<sub>5</sub><sup>+</sup>: 608.1842, found 608.1839.

**(5*S*,6*S*,7*R*,8*S*,9*S*,10*S*)-1,7-dimethyl-3-phenyl-8-furyl-10-ferrocenyl-9-nitro-6-hydroxyl-2,3-diazaspiro[4.5]dec-1-ene-4-one**

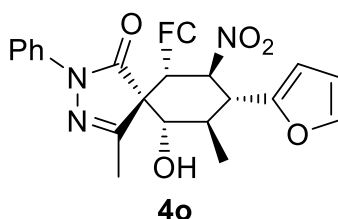

Prepared according to the general procedure using (*E*)-2-(2-nitrovinyl)furan **3o** (55.64 mg, 0.40 mmol,

1.0 equiv), propionaldehyde **2a** (46.46 mg, 0.8 mmol, 2 equiv) and (Z)-4-ferrocenylidene-5-methyl-2-phenyl-2,4-dihydro-3H-pyrazol-3-one **1a** (111.07 mg, 0.30 mmol, 0.75 equiv). Purification of the crude product via column chromatography delivered **4o** as a yellow solid with 55% yield (97.4 mg). The diastereomeric ratio was determined to be >20:1 by crude <sup>1</sup>H-NMR analysis, and the enantiomeric excess of the major product was determined to be 92% by chiral HPLC analysis on Chiralpak AD-H column (10% 2-propanol/*n*-hexane, 1 mL/min, UV 254 nm), *t*<sub>major</sub> = 14.65 min, *t*<sub>minor</sub> = 8.28 min; [ $\alpha$ ]<sub>D</sub><sup>20</sup> = -61.0 (*c* = 0.24 in CH<sub>2</sub>Cl<sub>2</sub>); decomp. >150 °C.

*NMR and HRMS data for the product 4o:*

**<sup>1</sup>H NMR (400 MHz, CDCl<sub>3</sub>):**  $\delta$  (ppm): 7.50 - 7.44 (m, 3H), 7.30 - 7.26 (m, 2H), 7.13 (tt, *J* = 7.2, 1.2 Hz, 1H), 6.33 (dd, *J* = 3.2, 2.0 Hz, 1H), 6.24 (d, *J* = 3.2 Hz, 1H), 5.81 (t, *J* = 11.2 Hz, 1H), 4.14 (dd, *J* = 3.6, 1.6 Hz, 1H), 4.04 - 3.98 (m, 7H), 3.83 (dd, *J* = 3.6, 1.6 Hz, 1H), 3.65 (dd, *J* = 10.8, 6.4 Hz, 1H), 3.50 (d, *J* = 11.2 Hz, 1H), 3.12 (t, *J* = 11.2 Hz, 1H), 3.09 - 2.99 (m, 1H), 2.27 (s, 3H), 1.90 (d, *J* = 6.8 Hz, 1H), 0.90 (d, *J* = 6.4 Hz, 3H).

**<sup>13</sup>C NMR (100 MHz, CDCl<sub>3</sub>):**  $\delta$  (ppm): 171.7, 159.6, 150.2, 143.0, 137.0, 128.6, 125.5, 119.8, 110.2, 109.1, 86.5, 81.4, 75.2, 69.9, 67.8, 67.3, 66.1, 66.0, 65.5, 47.8, 42.0, 33.8, 15.8, 13.8.

**HRMS (ESI):** *m/z* calculated for C<sub>30</sub>H<sub>29</sub>FeN<sub>3</sub>O<sub>5</sub>Na<sup>+</sup>: 590.1349, found 590.1367.

**(5*S*,6*S*,7*R*,8*R*,9*R*,10*S*)-1,7-dimethyl-3,10-diphenyl-8-ferrocenyl-9-nitro-6-hydroxyl-2,3-diazaspiro[4.5]dec-1-ene-4-one**

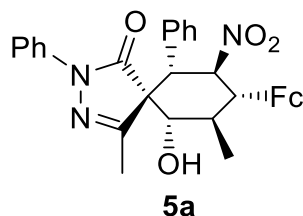

Prepared according to the general procedure using (*E*)-2-(2-nitrovinyl)ferrocene **3p** (102.83 mg, 0.40 mmol, 1.0 equiv), propionaldehyde **2a** (46.46 mg, 0.8 mmol, 2 equiv) and (Z)-4-benzylidene-5-methyl-2-phenyl-2,4-dihydro-3H-pyrazol-3-one **1f** (78.69 mg, 0.30 mmol). Purification of the crude product via column chromatography delivered **5a** as a yellow solid with 54% yield (93.7 mg). The diastereomeric ratio was determined to be 86:14 by crude <sup>1</sup>H-NMR analysis, and the enantiomeric



excess of the major product was determined to be 94% by chiral HPLC analysis on Chiralpak AD-H column (10% 2-propanol/*n*-hexane, 1 mL/min, UV 254 nm),  $t_{\text{major}} = 15.44$  min,  $t_{\text{minor}} = 20.62$  min;  $[\alpha]_{\text{D}}^{20} = 301.0$  ( $c = 0.23$  in  $\text{CH}_2\text{Cl}_2$ ); m.p. 175-178°C.

*NMR and HRMS data for the product 5a:*

**$^1\text{H}$  NMR (400 MHz,  $\text{CDCl}_3$ ):**  $\delta$  (ppm): 7.69 - 7.64 (m, 2H), 7.38 - 7.33 (m, 2H), 7.21 - 7.10 (m, 5H), 5.81 (dd,  $J = 12.0, 10.8$  Hz, 1H), 4.24 - 4.20 (m, 2H), 4.12 (s, 5H), 4.12 - 4.08 (m, 2H), 3.77 (dd,  $J = 10.4, 6.4$  Hz, 1H), 3.48 (d,  $J = 11.6$  Hz, 1H), 2.97 (t,  $J = 11.2$  Hz, 1H), 2.70 - 2.60 (m, 1H), 2.12 (s, 3H), 1.79 (d,  $J = 6.4$  Hz, 1H), 1.29 (d,  $J = 6.4$  Hz, 3H).

**$^{13}\text{C}$  NMR (100 MHz,  $\text{CDCl}_3$ ):**  $\delta$  (ppm): 172.2, 159.6, 138.8, 137.3, 129.8, 128.8, 125.6, 119.5, 89.0, 87.1, 75.8, 69.6, 68.9, 67.8, 67.6, 67.0, 65.9, 63.8, 50.2, 45.0, 37.2, 21.1, 17.1, 13.4.

**HRMS (ESI):**  $m/z$  calculated for  $\text{C}_{32}\text{H}_{32}\text{FeN}_3\text{O}_4^+$ : 578.1737, found 578.1724.

**(5*S*,6*S*,7*R*,8*R*,9*R*,10*S*)-1,7-dimethyl-3-phenyl-10-(*p*-tolyl)-8-ferrocenyl-9-nitro-6-hydroxyl-2,3-diazaspiro[4.5]dec-1-ene-4-one**

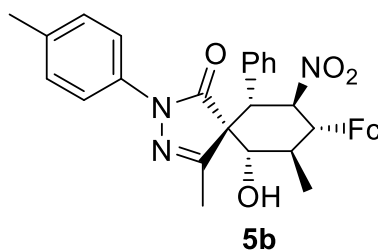

Prepared according to the general procedure using (*E*)-2-(2-nitrovinyl)ferrocene **3p** (102.83 mg, 0.40 mmol, 1.0 equiv), propionaldehyde **2a** (46.46 mg, 0.8 mmol, 2 equiv) and (*Z*)-4-benzylidene-5-methyl-2-(*p*-tolyl)-2,4-dihydro-3H-pyrazol-3-one **1g** (82.84 mg, 0.30 mmol). Purification of the crude product via column chromatography delivered **5b** as a yellow solid with 64% yield (118.7 mg). The diastereomeric ratio was determined to be >20:1 by crude  $^1\text{H}$ -NMR analysis, and the enantiomeric excess of the major product was determined to be >99% by chiral HPLC analysis on Chiralpak AD-H column (10% 2-propanol/*n*-hexane, 1 mL/min, UV 254 nm),  $t_{\text{major}} = 28.58$  min,  $t_{\text{minor}} = 14.52$  min;  $[\alpha]_{\text{D}}^{20} = 343.0$  ( $c = 0.21$  in  $\text{CH}_2\text{Cl}_2$ ); m.p. 138-140°C.

*NMR and HRMS data for the product 5b:*

**<sup>1</sup>H NMR (400 MHz, CDCl<sub>3</sub>):** δ (ppm): 7.54 - 7.49 (m, 2H), 7.22 - 7.14 (m, 7H), 5.79 (dd, *J* = 11.2, 10.8 Hz, 1H), 4.22 (t, *J* = 1.6 Hz, 2H), 4.14 - 4.08 (m, 7H), 3.73 (dd, *J* = 10.4, 6.4 Hz, 1H), 3.45 (d, *J* = 11.6 Hz, 1H), 2.94 (t, *J* = 11.2 Hz, 1H), 2.69 - 2.59 (m, 1H), 2.33 (s, 3H), 2.08 (s, 3H), 1.88 (d, *J* = 6.8 Hz, 1H), 1.27 (d, *J* = 6.4 Hz, 3H).

**<sup>13</sup>C NMR (100 MHz, CDCl<sub>3</sub>):** δ (ppm): 171.9, 159.4, 135.4, 134.8, 132.9, 129.3, 129.0, 128.9, 119.7, 88.9, 87.2, 75.8, 69.7, 67.8, 67.6, 67.1, 66.1, 63.6, 50.5, 45.0, 37.1, 21.0, 17.1, 13.4.

**HRMS (ESI):** *m/z* calculated for C<sub>33</sub>H<sub>33</sub>FeN<sub>3</sub>O<sub>4</sub>Na<sup>+</sup>:614.1713, found 614.1719.

**(5*S*,6*S*,7*R*,8*R*,9*R*,10*S*)-1,7-dimethyl-3-phenyl-10-(3-chlorophenyl)-8-ferrocenyl-9-nitro-6-hydroxyl-2,3-diazaspiro[4.5]dec-1-ene-4-one**

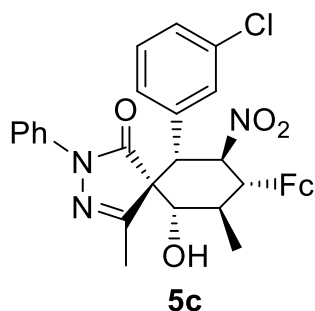

Prepared according to the general procedure using (*E*)-2-(2-nitrovinyl)ferrocene **3p** (102.83 mg, 0.40 mmol, 1.0 equiv), propionaldehyde **2a** (46.46 mg, 0.8 mmol, 2 equiv) and (*Z*)-4-(3-chlorobenzylidene)-5-methyl-2-phenyl-2,4-dihydro-3H-pyrazol-3-one **1h** (89.03 mg, 0.30 mmol). Purification of the crude product via column chromatography delivered **5c** as a yellow solid with 60% yield (113.7 mg). The diastereomeric ratio was determined to be 96:4 by crude <sup>1</sup>H-NMR analysis, and the enantiomeric excess of the major product was determined to be 99% by chiral HPLC analysis on Chiralpak AD-H column (10% 2-propanol/*n*-hexane, 1 mL/min, UV 254 nm), *t*<sub>major</sub> = 24.52 min, *t*<sub>minor</sub> = 17.11 min; [α]<sub>D</sub><sup>20</sup> = 323.9 (*c* = 0.21 in CH<sub>2</sub>Cl<sub>2</sub>); m.p. 130-132 °C.

*NMR and HRMS data for the product 5c:*

**<sup>1</sup>H NMR (400 MHz, CDCl<sub>3</sub>):** δ (ppm): 7.68 - 7.63 (m, 2H), 7.39 - 7.34 (m, 2H), 7.24 - 6.96 (m, 5H), 5.77 (dd, *J* = 12.0, 10.8 Hz, 1H), 4.24 - 4.21 (m, 2H), 4.13 - 4.11 (m, 6H), 4.08 - 4.07 (m, 1H), 3.75

(d,  $J = 10.4$  Hz, 1H), 3.45 (d,  $J = 11.6$  Hz, 1H), 2.95 (t,  $J = 11.6$  Hz, 1H), 2.68 - 2.60 (m, 1H), 2.12 (s, 3H), 1.80 (br s, 1H), 1.28 (d,  $J = 6.8$  Hz, 3H).

$^{13}\text{C}$  NMR (100 MHz,  $\text{CDCl}_3$ ):  $\delta$  (ppm): 171.8, 159.2, 137.0, 134.9, 130.2, 129.4, 128.8, 125.9, 119.7, 88.6, 86.8, 75.7, 69.6, 69.0, 67.7, 67.1, 65.9, 63.5, 49.9, 45.0, 37.1, 17.0, 13.4.

HRMS (ESI):  $m/z$  calculated for  $\text{C}_{32}\text{H}_{30}\text{ClFeN}_3\text{O}_4\text{Na}^+$ : 634.1166, found 634.1171.

**(5*S*,6*S*,7*R*,8*R*,9*R*,10*S*)-1,7-dimethyl-3-phenyl-10-(4-chlorophenyl)-8-ferrocenyl-9-nitro-6-hydroxyl-2,3-diazaspiro[4.5]dec-1-ene-4-one**

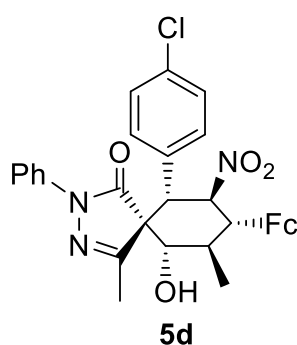

Prepared according to the general procedure using (*E*)-2-(2-nitrovinyl)ferrocene **3p** (102.83 mg, 0.40 mmol, 1.0 equiv), propionaldehyde **2a** (46.46 mg, 0.8 mmol, 2 equiv) and (*Z*)-4-(4-chlorobenzylidene)-5-methyl-2-phenyl-2,4-dihydro-3H-pyrazol-3-one **1i** (89.03 mg, 0.30 mmol). Purification of the crude product via column chromatography delivered **5d** as a yellow solid with 63% yield (120.3 mg). The diastereomeric ratio was determined to be 86:14 by crude  $^1\text{H}$ -NMR analysis, and the enantiomeric excess of the major product was determined to be 98% by chiral HPLC analysis on Chiralpak AD-H column (10% 2-propanol/*n*-hexane, 1 mL/min, UV 254 nm),  $t_{\text{major}} = 15.75$  min,  $t_{\text{minor}} = 10.96$  min;  $[\alpha]_{\text{D}}^{20} = 318.0$  ( $c = 0.23$  in  $\text{CH}_2\text{Cl}_2$ ); m.p. 124-127°C.

*NMR and HRMS data for the product 5d:*

$^1\text{H}$  NMR (400 MHz,  $\text{CDCl}_3$ ):  $\delta$  (ppm): 7.71 - 7.66 (m, 2H), 7.39 - 7.34 (m, 2H), 7.22 - 7.04 (m, 5H), 5.77 (dd,  $J = 11.8, 10.4$  Hz, 1H), 4.24 - 4.21 (m, 2H), 4.13 - 4.10 (s, 6H), 4.08 - 4.06 (m, 1H), 3.76 (dd,  $J = 10.4, 6.8$  Hz, 1H), 3.47 (d,  $J = 12.0$  Hz, 1H), 2.96 (t,  $J = 10.8$  Hz, 1H), 2.68 - 2.60 (m, 1H), 2.12 (s, 3H), 1.73 (d,  $J = 6.4$  Hz, 1H), 1.29 (d,  $J = 6.4$  Hz, 3H).

**<sup>13</sup>C NMR (100 MHz, CDCl<sub>3</sub>):** δ (ppm): 171.9 , 159.2 , 137.2 , 135.1 , 131.5 , 129.2 , 128.9 , 125.8 , 119.4 , 88.8 , 86.8 , 75.7 , 69.6 , 69.0 , 67.7 , 67.6 , 67.1 , 65.9 , 63.6 , 49.8 , 45.0 , 37.1 , 17.0 , 13.4 .

**HRMS (ESI):** *m/z* calculated for C<sub>32</sub>H<sub>30</sub>ClFeN<sub>3</sub>O<sub>4</sub>Na<sup>+</sup>: 634.1166, found 634.1177.

**(5*S*,6*S*,7*R*,8*R*,9*R*,10*S*)-1,7-dimethyl-3-phenyl-10-(3-bromophenyl)-8-ferrocenyl-9-nitro-6-hydroxyl-2,3-diazaspiro[4.5]dec-1-ene-4-one**

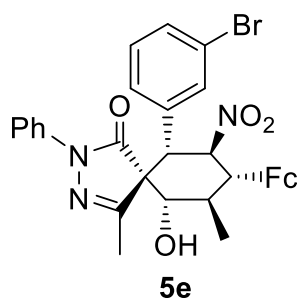

Prepared according to the general procedure using (*E*)-2-(2-nitrovinyl)ferrocene **3p** (102.83 mg, 0.40 mmol, 1.0 equiv), propionaldehyde **2a** (46.46 mg, 0.8 mmol, 2 equiv) and (*Z*)-4-(3-bromobenzylidene)-5-methyl-2-phenyl-2,4-dihydro-3H-pyrazol-3-one **1j** (102.06 mg, 0.30 mmol). Purification of the crude product via column chromatography delivered **5e** as a yellow solid with 58% yield (117.0 mg). The diastereomeric ratio was determined to be 85:15 by crude <sup>1</sup>H-NMR analysis, and the enantiomeric excess of the major product was determined to be 99% by chiral HPLC analysis on Chiralpak AD-H column (10% 2-propanol/*n*-hexane, 1 mL/min, UV 254 nm), *t*<sub>major</sub> = 26.45 min, *t*<sub>minor</sub> = 18.16 min; [α]<sub>D</sub><sup>20</sup> = 284.1 (*c* = 0.20 in CH<sub>2</sub>Cl<sub>2</sub>); m.p. 123-126°C.

*NMR and HRMS data for the product 5e:*

**<sup>1</sup>H NMR (400 MHz, CDCl<sub>3</sub>):** δ (ppm): 7.68 - 7.64 (m, 2H), 7.43 - 7.28 (m, 4H), 7.22 - 7.17 (m, 1H), 7.08 - 6.95 (m, 2H), 5.77 (t, *J* = 11.2 Hz, 1H), 4.24 - 4.21 (m, 2H), 4.13 - 4.11 (m, 6H), 4.09 - 4.07 (m, 1H), 3.76 (dd, *J* = 10.4, 6.4 Hz, 1H), 3.45 (d, *J* = 11.6 Hz, 1H), 2.95 (t, *J* = 10.8 Hz, 1H), 2.68 - 2.61 (m, 1H), 2.13 (s, 3H), 1.74 (d, *J* = 6.4 Hz, 1H), 1.29 (d, *J* = 6.4 Hz, 3H).

**<sup>13</sup>C NMR (100 MHz, CDCl<sub>3</sub>):** δ (ppm): 171.8 , 159.2 , 137.0 , 135.2 , 132.3 , 128.8 , 128.7 , 125.9 , 119.9 , 88.6 , 86.8 , 75.6 , 69.6 , 69.0 , 67.7 , 67.1 , 65.9 , 63.5 , 49.9 , 45.0 , 37.1 , 17.0 , 13.4 .

**HRMS (ESI):** *m/z* calculated for C<sub>32</sub>H<sub>30</sub>BrFeN<sub>3</sub>O<sub>4</sub>Na<sup>+</sup>: 678.0661, found 678.0674.

**(5*S*,6*S*,7*R*,8*R*,9*R*,10*S*)-1,7-dimethyl-3-phenyl-10-(4-bromophenyl)-8-ferrocenyl-9-nitro-6-hydroxyl-2,3-diazaspiro[4.5]dec-1-ene-4-one**

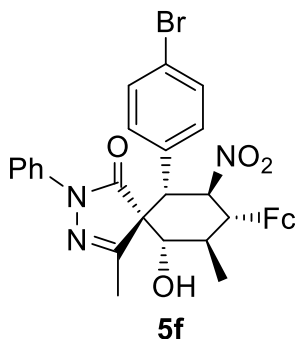

Prepared according to the general procedure using (*E*)-2-(2-nitrovinyl)ferrocene **3p** (102.83 mg, 0.40 mmol, 1.0 equiv), propionaldehyde **2a** (46.46 mg, 0.8 mmol, 2 equiv) and (*Z*)-4-(4-bromobenzylidene)-5-methyl-2-phenyl-2,4-dihydro-3H-pyrazol-3-one **1k** (102.06 mg, 0.30 mmol). Purification of the crude product via column chromatography delivered **5f** as a yellow solid with 59% yield (119.3 mg). The diastereomeric ratio was determined to be 92:8 by crude <sup>1</sup>H-NMR analysis, and the enantiomeric excess of the major product was determined to be 98% by chiral HPLC analysis on Chiralpak AD-H column (10% 2-propanol/*n*-hexane, 1 mL/min, UV 254 nm), *t*<sub>major</sub> = 16.52 min, *t*<sub>minor</sub> = 11.56 min; [ $\alpha$ ]<sub>D</sub><sup>20</sup> = 312.7 (*c* = 0.24 in CH<sub>2</sub>Cl<sub>2</sub>); m.p. 123-125 °C.

*NMR and HRMS data for the product 5f:*

**<sup>1</sup>H NMR (400 MHz, CDCl<sub>3</sub>):**  $\delta$  (ppm): 7.70 - 7.66 (m, 2H), 7.40 - 7.35 (m, 2H), 7.34 - 7.29 (m, 2H), 7.22 - 7.17 (m, 1H), 7.16 - 6.91 (m, 2H), 5.76 (dd, *J* = 11.6, 10.8 Hz, 1H), 4.24 - 4.21 (m, 2H), 4.13 - 4.10 (m, 6H), 4.08 - 4.06 (m, 1H), 3.74 (dd, *J* = 10.4, 6.4 Hz, 1H), 3.45 (d, *J* = 12.0, H), 2.94 (t, *J* = 11.2 Hz, 1H), 2.66 - 2.58 (m, 1H), 2.10 (s, 3H), 1.81 (d, *J* = 6.4 Hz, 1H), 1.28 (d, *J* = 6.4 Hz, 3H).

**<sup>13</sup>C NMR (100 MHz, CDCl<sub>3</sub>):**  $\delta$  (ppm): 171.9, 159.2, 137.2, 132.2, 132.0, 128.9, 125.8, 123.3, 119.4, 88.7, 86.8, 75.7, 69.6, 67.7, 67.6, 67.1, 65.9, 63.5, 49.8, 45.0, 37.1, 17.0, 13.4.

**HRMS (ESI):** *m/z* calculated for C<sub>32</sub>H<sub>30</sub>BrN<sub>3</sub>O<sub>4</sub>Na<sup>+</sup>: 678.0661, found 678.0665.

**(5*S*,6*S*,7*R*,8*R*,9*R*,10*S*)-1,7-dimethyl-3-phenyl-10-(2-fluorophenyl)-8-ferrocenyl-9-nitro-6-hydroxyl-2,3-diazaspiro[4.5]dec-1-ene-4-one**

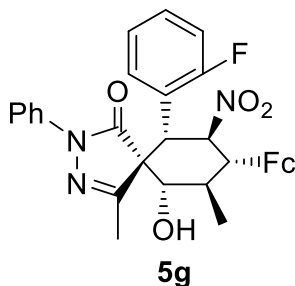

Prepared according to the general procedure using (*E*)-2-(2-nitrovinyl)ferrocene **3p** (102.83 mg, 0.40 mmol, 1.0 equiv), propionaldehyde **2a** (46.46 mg, 0.8 mmol, 2 equiv) and (*Z*)-4-(2-fluorobenzylidene)-5-methyl-2-phenyl-2,4-dihydro-3H-pyrazol-3-one **1l** (84.03 mg, 0.30 mmol). Purification of the crude product via column chromatography delivered **5g** as a yellow solid with 55% yield (102.4 mg). The diastereomeric ratio was determined to be 93:7 by crude <sup>1</sup>H-NMR analysis, and the enantiomeric excess of the major product was determined to be 99% by chiral HPLC analysis on Chiralpak IC-H column (10% 2-propanol/*n*-hexane, 1 mL/min, UV 254 nm), *t*<sub>major</sub>=8.89 min, *t*<sub>minor</sub>=20.22 min; [ $\alpha$ ]<sub>D</sub><sup>20</sup> = 313.0 (*c* = 0.21 in CH<sub>2</sub>Cl<sub>2</sub>); m.p. 125-129°C.

*NMR and HRMS data for the product 5g:*

**<sup>1</sup>H NMR (400 MHz, CDCl<sub>3</sub>):**  $\delta$  (ppm): 7.68 - 7.62 (m, 2H), 7.40 - 7.32 (m, 3H), 7.21 - 7.14 (m, 2H), 7.02 - 6.91 (m, 2H), 5.79 (t, *J* = 11.2 Hz, 1H), 4.24 - 4.20 (m, 2H), 4.17 (d, *J* = 11.6 Hz, 1H), 4.14 - 4.10 (m, 6H), 4.09 - 4.08 (m, 1H), 3.82 (dd, *J* = 10.4, 6.8 Hz, 1H), 3.01 (t, *J* = 11.2 Hz, 1H), 2.70 - 2.59 (m, 1H), 2.17 (s, 3H), 1.80 (d, *J* = 6.4 Hz, 1H), 1.30 (d, *J* = 6.4 Hz, 3H).

**<sup>13</sup>C NMR (100 MHz, CDCl<sub>3</sub>):**  $\delta$  (ppm): 172.0, 160.0 (d, *J*<sub>CF</sub> = 245.0 Hz), 159.8, 137.2, 130.5 (d, *J*<sub>CF</sub> = 8.7 Hz), 128.8, 128.2 (d, *J*<sub>CF</sub> = 2.2 Hz), 125.7, 124.7 (d, *J*<sub>CF</sub> = 3.5 Hz), 120.1 (d, *J*<sub>CF</sub> = 13.3 Hz), 119.5, 115.9 (d, *J*<sub>CF</sub> = 23.3 Hz), 88.2, 86.8, 75.7, 69.6, 67.7, 67.6, 67.1, 65.9, 63.6, 45.0, 40.2 (d, *J*<sub>CF</sub> = 4.1 Hz), 37.1, 17.0, 12.8 (d, *J*<sub>CF</sub> = 5.6 Hz).

**HRMS (ESI):** *m/z* calculated for C<sub>32</sub>H<sub>30</sub>FFeN<sub>3</sub>O<sub>4</sub>Na<sup>+</sup>: 618.1462, found 618.1468.

**(5*S*,6*S*,7*R*,8*R*,9*R*,10*S*)-1,7-dimethyl-3-phenyl-10-(*p*-tolyl)-8-ferrocenyl-9-nitro-6-hydroxyl-2,3-diazaspiro[4.5]dec-1-ene-4-one**

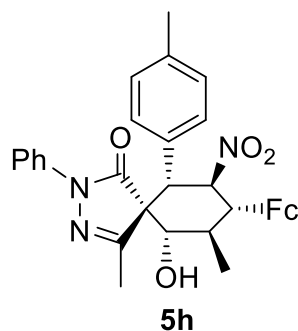

Prepared according to the general procedure using (*E*)-2-(2-nitrovinyl)ferrocene **3p** (102.83 mg, 0.40 mmol, 1.0 equiv), propionaldehyde **2a** (46.46 mg, 0.8 mmol, 2 equiv) and (*Z*)-4-(4-methylbenzylidene)-5-methyl-2-phenyl-2,4-dihydro-3H-pyrazol-3-one **1m** (82.90 mg, 0.30 mmol). Purification of the crude product via column chromatography delivered **5h** as a yellow solid with 62% yield (110.3 mg). The diastereomeric ratio was determined to be >20:1 by crude <sup>1</sup>H-NMR analysis, and the enantiomeric excess of the major product was determined to be 96% by chiral HPLC analysis on Chiralpak AD-H column (10% 2-propanol/*n*-hexane, 1 mL/min, UV 254 nm), *t*<sub>major</sub> = 21.15 min, *t*<sub>minor</sub> = 14.92 min; [ $\alpha$ ]<sub>D</sub><sup>20</sup> = 343.9 (*c* = 0.21 in CH<sub>2</sub>Cl<sub>2</sub>); m.p. 119-122 °C.

*NMR and HRMS data for the product 5h:*

**<sup>1</sup>H NMR (400 MHz, CDCl<sub>3</sub>):**  $\delta$  (ppm): 7.73 - 7.66 (m, 2H), 7.40 - 7.33 (m, 2H), 7.22 - 6.91 (m, 5H), 5.79 (t, *J* = 11.6, 10.8 Hz, 1H), 4.24 - 4.19 (m, 2H), 4.14 - 4.11 (m, 6H), 4.08 (dd, *J* = 3.6, 1.6 Hz, 1H), 3.76 (dd, *J* = 10.4, 6.8 Hz, 1H), 3.44 (d, *J* = 11.6 Hz, 1H), 2.95 (t, *J* = 10.8 Hz, 1H), 2.68 - 2.58 (m, 1H), 2.21 (s, 3H), 2.11 (s, 3H), 1.71 (d, *J* = 6.4 Hz, 1H), 1.27 (d, *J* = 6.4 Hz, 3H).

**<sup>13</sup>C NMR (100 MHz, CDCl<sub>3</sub>):**  $\delta$  (ppm): 172.2, 159.6, 138.8, 137.3, 129.8, 129.7, 128.8, 125.6, 119.5, 89.0, 87.2, 75.8, 69.6, 67.8, 67.6, 67.0, 66.0, 63.8, 50.2, 45.0, 37.2, 21.1, 17.1, 13.4.

**HRMS (ESI):** *m/z* calculated for C<sub>33</sub>H<sub>34</sub>FeN<sub>3</sub>O<sub>4</sub><sup>+</sup>: 592.1893, found 592.1840.

**(5*S*,6*S*,7*R*,8*R*,9*R*,10*S*)-1,7-dimethyl-3-phenyl-10-(4-methoxyphenyl)-8-ferrocenyl-9-nitro-6-hydroxyl-2,3-diazaspiro[4.5]dec-1-ene-4-one**

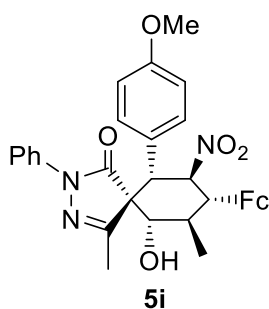

Prepared according to the general procedure using (*E*)-2-(2-nitrovinyl)ferrocene **3p** (102.83 mg, 0.40 mmol, 1.0 equiv), propionaldehyde **2a** (46.46 mg, 0.8 mmol, 2 equiv) and (*Z*)-4-(4-methoxybenzylidene)-5-methyl-2-phenyl-2,4-dihydro-3H-pyrazol-3-one **1n** (87.70 mg, 0.30 mmol). Purification of the crude product via column chromatography delivered **5i** as a yellow solid with 66% yield (119.6 mg). The diastereomeric ratio was determined to be >20:1 by crude <sup>1</sup>H-NMR analysis, and the enantiomeric excess of the major product was determined to be 98% by chiral HPLC analysis on Chiralpak AD-H column (10% 2-propanol/*n*-hexane, 1 mL/min, UV 254 nm), *t*<sub>major</sub> = 22.19 min, *t*<sub>minor</sub> = 17.54 min; [ $\alpha$ ]<sub>D</sub><sup>20</sup> = 342.4 (*c* = 0.22 in CH<sub>2</sub>Cl<sub>2</sub>); m.p. 130-133 °C.

*NMR and HRMS data for the product 5i:*

**<sup>1</sup>H NMR (400 MHz, CDCl<sub>3</sub>):**  $\delta$  (ppm): 7.73 - 7.67 (m, 2H), 7.36 (tt, *J* = 7.6, 2.0 Hz, 2H), 7.21 - 6.94 (m, 3H), 6.72 - 6.67 (m, 2H), 5.76 (t, *J* = 11.2 Hz, 1H), 4.21 (dd, *J* = 3.6, 1.6 Hz, 2H), 4.12 - 4.07 (m, 7H), 3.75 (dd, *J* = 10.4, 6.0 Hz, 1H), 3.69 (s, 3H), 3.43 (d, *J* = 11.6 Hz, 1H), 2.95 (t, *J* = 10.8 Hz, 1H), 2.66 - 2.59 (m, 1H), 1.72 (d, *J* = 6.4 Hz, 1H), 1.27 (d, *J* = 6.4 Hz, 3H).

**<sup>13</sup>C NMR (100 MHz, CDCl<sub>3</sub>):**  $\delta$  (ppm): 172.2, 159.8, 159.6, 137.3, 128.8, 125.6, 124.8, 119.5, 89.1, 87.1, 75.8, 69.6, 67.7, 67.6, 67.0, 65.9, 63.9, 55.1, 49.8, 45.0, 37.2, 17.1, 13.4.

**HRMS (ESI):** *m/z* calculated for C<sub>33</sub>H<sub>34</sub>FeN<sub>3</sub>O<sub>5</sub><sup>+</sup>: 608.1842, found 608.1834.

**(5*S*,6*S*,7*R*,8*R*,9*R*,10*S*)-1,7-dimethyl-3-phenyl-10-thienyl-8-ferrocenyl-9-nitro-6-hydroxyl-2,3-diazaspiro[4.5]dec-1-ene-4-one**

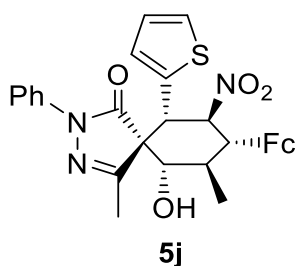



Prepared according to the general procedure using (*E*)-2-(2-nitrovinyl)ferrocene **3p** (102.83 mg, 0.40 mmol, 1.0 equiv), propionaldehyde **2a** (46.46 mg, 0.8 mmol, 2 equiv) and (*Z*)-4-thienylidene-5-methyl-2-phenyl-2,4-dihydro-3H-pyrazol-3-one **1o** (80.50 mg, 0.30 mmol). Purification of the crude product via column chromatography delivered **5j** as a yellow solid with 51% yield (88.7 mg). The diastereomeric ratio was determined to be >20:1 by crude <sup>1</sup>H-NMR analysis, and the enantiomeric excess of the major product was determined to be >99% by chiral HPLC analysis on Chiralpak AD-H column (10% 2-propanol/*n*-hexane, 1 mL/min, UV 254 nm), *t*<sub>major</sub> = 22.80 min, *t*<sub>minor</sub> = 25.66 min; [ $\alpha$ ]<sub>D</sub><sup>20</sup> = 314.1 (*c* = 0.25 in CH<sub>2</sub>Cl<sub>2</sub>); m.p. 145-145°C.

*NMR and HRMS data for the product 5j:*

**<sup>1</sup>H NMR (400 MHz, CDCl<sub>3</sub>):**  $\delta$  (ppm): 7.80 - 7.74 (m, 2H), 7.41 - 7.35 (m, 2H), 7.22 - 7.17 (m, 1H), 7.15 - 7.12 (m, 1H), 6.88 (dd, *J* = 3.6, 1.2 Hz, 1H), 6.82 (dd, *J* = 5.2, 3.6 Hz, 1H), 5.74 (dd, *J* = 11.6, 10.8, 1H), 4.23-4.21 (m, 2H), 4.14 - 4.11 (m, 6H), 4.06 (dd, *J* = 3.6, 1.6 Hz, 1H), 3.83 (d, *J* = 11.6 Hz, 1H), 3.74 (dd, *J* = 10.4, 6.4 Hz, 1H), 2.94 (t, *J* = 10.8 Hz, 1H), 2.64 - 2.56 (m, 1H), 2.15 (s, 3H), 1.77 (d, *J* = 6.4 Hz, 1H), 1.27 (d, *J* = 6.4 Hz, 3H).

**<sup>13</sup>C NMR (100 MHz, CDCl<sub>3</sub>):**  $\delta$  (ppm): 171.6, 159.2, 137.4, 134.5, 128.8, 127.2, 127.0, 126.1, 125.6, 119.4, 90.2, 86.9, 75.6, 69.6, 67.8, 67.6, 67.1, 66.0, 64.0, 45.3, 44.9, 37.0, 17.0, 13.3.

**HRMS (ESI):** *m/z* calculated for C<sub>30</sub>H<sub>30</sub>FeN<sub>3</sub>O<sub>4</sub>S<sup>+</sup>: 584.1301, found 584.1290.

**(5*S*,6*S*,7*R*,8*R*,9*R*,10*S*)-1,7-dimethyl-3-phenyl-10-naphthyl-8-ferrocenyl-9-nitro-6-hydroxyl-2,3-diazaspiro[4.5]dec-1-ene-4-one**

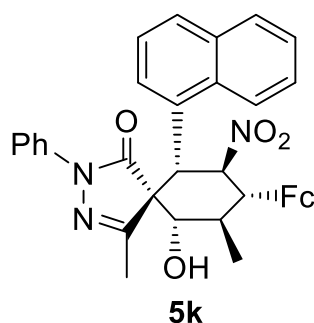

Prepared according to the general procedure using (*E*)-2-(2-nitrovinyl)ferrocene **3p** (102.83 mg, 0.40 mmol, 1.0 equiv), propionaldehyde **2a** (46.46 mg, 0.8 mmol, 2 equiv) and (*Z*)-4-naphthylidene-5-methyl-2-phenyl-2,4-dihydro-3H-pyrazol-3-one **1p** (93.71 mg, 0.30 mmol). Purification of the crude

product via column chromatography delivered **5k** as a yellow solid with 49% yield (96.5 mg). The diastereomeric ratio was determined to be >20:1 by crude  $^1\text{H}$ -NMR analysis, and the enantiomeric excess of the major product was determined to be >99% by chiral HPLC analysis on Chiralpak AD-H column (10% 2-propanol/*n*-hexane, 1 mL/min, UV 254 nm),  $t_{\text{major}} = 34.61$  min,  $t_{\text{minor}} = 18.09$  min;  $[\alpha]_{\text{D}}^{20} = 444.1$  ( $c = 0.22$  in  $\text{CH}_2\text{Cl}_2$ ); decomp.  $>197^\circ\text{C}$ .

*NMR and HRMS data for the product 5k:*

**$^1\text{H}$  NMR (400 MHz,  $\text{CDCl}_3$ ):**  $\delta$  (ppm): 8.13 (d,  $J = 8.4$  Hz, 1H), 7.80 (dd,  $J = 8.0, 1.2$  Hz, 1H), 7.71 - 7.67 (m, 3H), 7.63 (dd,  $J = 7.6, 1.2$  Hz, 1H), 7.59 - 7.55 (m, 1H), 7.49 - 7.45 (m, 1H), 7.40 - 7.35 (m, 2H), 7.24 - 7.18 (m, 2H), 5.97 (dd,  $J = 11.6, 10.4$  Hz, 1H), 4.64 (d,  $J = 11.6$  Hz, 1H), 4.24 - 4.21 (m, 2H), 4.15 - 4.14 (m, 1H), 4.12 - 4.10 (m, 6H), 3.92 (dd,  $J = 10.4, 6.4$  Hz, 1H), 3.14 (t,  $J = 10.8$  Hz, 1H), 2.80 - 2.70 (m, 1H), 1.79 (d,  $J = 6.4$  Hz, 1H), 1.35 (d,  $J = 6.8$  Hz, 3H).

**$^{13}\text{C}$  NMR (100 MHz,  $\text{CDCl}_3$ ):**  $\delta$  (ppm): 172.6, 159.6, 137.3, 134.1, 131.2, 129.5, 129.4, 128.8, 126.7, 125.8, 125.7, 125.3, 125.2, 121.8, 119.5, 89.3, 87.0, 76.3, 69.6, 67.7, 67.6, 67.1, 66.0, 64.2, 45.6, 42.5, 37.4, 17.2, 13.6.

**HRMS (ESI):**  $m/z$  calculated for  $\text{C}_{36}\text{H}_{33}\text{FeN}_3\text{O}_4\text{Na}^+$ : 650.1713, found 650.1716.

**(5*S*,6*S*,7*R*,8*R*,9*R*,10*S*)-1-methyl-7-ethyl-3,10-diphenyl-8-ferrocenyl-9-nitro-6-hydroxyl-2,3-diazaspiro[4.5]dec-1-ene-4-one**

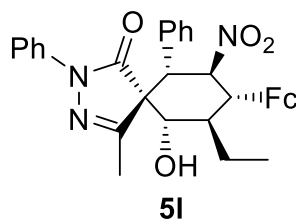

Prepared according to the general procedure using (*E*)-2-(2-nitrovinyl)ferrocene **3p** (102.83 mg, 0.40 mmol, 1.0 equiv), propionaldehyde **2b** (57.69 mg, 0.8 mmol, 2 equiv) and (*Z*)-4-benzylidene-5-methyl-2-phenyl-2,4-dihydro-3H-pyrazol-3-one **1f** (78.69 mg, 0.30 mmol). Purification of the crude product via column chromatography delivered **5l** as a yellow solid with 59% yield (108.1 mg). The diastereomeric ratio was determined to be 89:11 by crude  $^1\text{H}$ -NMR analysis, and the enantiomeric excess of the major product was determined to be 92% by chiral HPLC analysis on Chiralpak AD-H

column (10% 2-propanol/*n*-hexane, 1 mL/min, UV 254 nm),  $t_{\text{major}}=14.46$  min,  $t_{\text{minor}}=7.85$  min;  $[\alpha]_{\text{D}}^{20}=386.7$  ( $c=0.21$  in  $\text{CH}_2\text{Cl}_2$ ); m.p. 128-132 °C.

*NMR and HRMS data for the product 5l:*

**$^1\text{H}$  NMR (400 MHz,  $\text{CDCl}_3$ ):**  $\delta$  (ppm): 7.69 - 7.66 (m, 2H), 7.38 - 7.34 (m, 2H), 7.24 - 7.08 (m, 6H), 5.84 (dd,  $J=11.6, 10.4$  Hz, 1H), 4.24 - 4.22 (m, 2H), 4.16 (dd,  $J=3.6, 1.6$  Hz, 1H), 4.11 (s, 5H), 4.07 - 4.06 (m, 1H), 3.99 (dd,  $J=10.8, 6.4$  Hz, 1H), 3.41 (d,  $J=11.6$  Hz, 1H), 3.15 (t,  $J=11.2$  Hz, 1H), 2.61 (tt,  $J=11.2, 3.6$  Hz, 1H), 2.11 (s, 3H), 1.2 - 1.70 (m, 2H), 1.68 (d,  $J=6.4$  Hz, 1H), 0.96 (t,  $J=7.2$  Hz, 3H).

**$^{13}\text{C}$  NMR (100 MHz,  $\text{CDCl}_3$ ):**  $\delta$  (ppm): 172.2, 159.6, 137.3, 133.0, 129.0, 129.0, 128.8, 125.6, 119.6, 88.8, 87.4, 72.2, 69.6, 69.5, 67.6, 67.3, 67.0, 65.8, 63.6, 50.6, 41.2, 40.8, 19.5, 13.5, 8.0.

**HRMS (ESI):**  $m/z$  calculated for  $\text{C}_{33}\text{H}_{33}\text{FeN}_3\text{O}_4\text{Na}^+$ : 614.1713, found 614.1713.

**(5*S*,6*S*,7*R*,8*R*,9*R*,10*S*)-1-methyl-7-propyl-3,10-diphenyl-8-ferrocenyl-9-nitro-6-hydroxyl-2,3-diazaspiro[4.5]dec-1-ene-4-one**

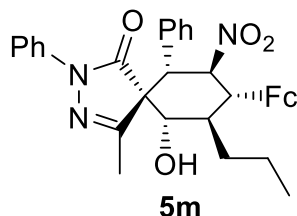

Prepared according to the general procedure using (*E*)-2-(2-nitrovinyl)ferrocene **3p** (102.83 mg, 0.40 mmol, 1.0 equiv), propionaldehyde **2c** (68.91 mg, 0.8 mmol, 2 equiv) and (*Z*)-4-benzylidene-5-methyl-2-phenyl-2,4-dihydro-3H-pyrazol-3-one **1f** (78.69 mg, 0.30 mmol). Purification of the crude product via column chromatography delivered **5m** as a yellow solid with 58% yield (108.3 mg). The diastereomeric ratio was determined to be 82:18 by crude  $^1\text{H}$ -NMR analysis, and the enantiomeric excess of the major product was determined to be 92% by chiral HPLC analysis on Chiralpak AD-H column (10% 2-propanol/*n*-hexane, 1 mL/min, UV 254 nm),  $t_{\text{major}}=10.66$  min,  $t_{\text{minor}}=7.27$  min;  $[\alpha]_{\text{D}}^{20}=361.8$  ( $c=0.23$  in  $\text{CH}_2\text{Cl}_2$ ); m.p. 114-116 °C.

*NMR and HRMS data for the product 5m:*

**<sup>1</sup>H NMR (400 MHz, CDCl<sub>3</sub>):** δ (ppm): 7.71 - 7.66 (m, 2H), 7.39 - 7.34 (m, 2H), 7.25 - 7.07 (m, 6H), 5.91 (dd, *J* = 11.6, 10.8 Hz, 1H), 4.26 - 4.24 (m, 1H), 4.23 - 4.21 (m, 1H), 4.21 - 4.19 (m, 1H), 4.10 (s, 5H), 4.03 - 4.02 (m, 1H), 3.96 (dd, *J* = 10.8, 6.4 Hz, 1H), 3.42 (d, *J* = 11.6 Hz, 1H), 3.14 (t, *J* = 11.2 Hz, 1H), 2.53 (tt, *J* = 11.2, 3.6 Hz, 1H), 2.11 (s, 3H), 1.58 (d, *J* = 6.8 Hz, 1H), 1.51 - 1.25 (m, 4H), 0.90 (t, *J* = 7.2 Hz, 3H).

**<sup>13</sup>C NMR (100 MHz, CDCl<sub>3</sub>):** δ (ppm): 172.2 , 159.6 , 137.3 , 133.0 , 129.1 , 128.8 , 125.6 , 119.6 , 88.2 , 87.4 , 73.0 , 69.6 , 69.6 , 67.7 , 67.6 , 66.8 , 65.6 , 63.7 , 50.8 , 41.8 , 41.7 , 29.8 , 17.3 , 14.4 , 13.4 .

**HRMS (ESI):** *m/z* calculated for C<sub>34</sub>H<sub>35</sub>FeN<sub>3</sub>O<sub>4</sub>Na<sup>+</sup>: 628.1869, found 628.1875.

### 3. Crystal data of 4m and 5b

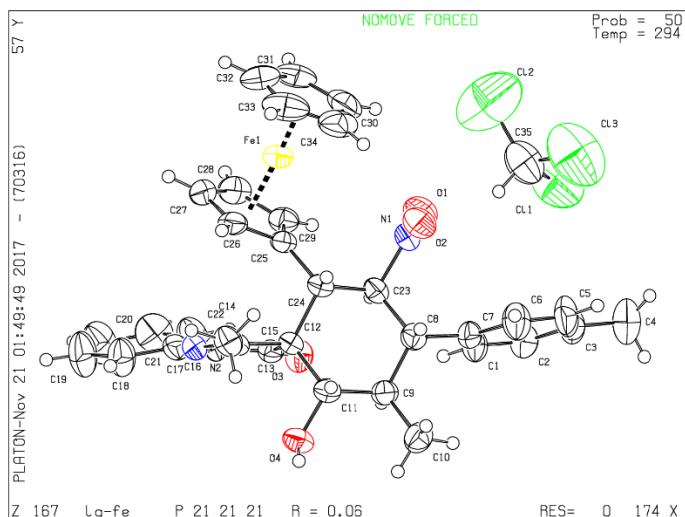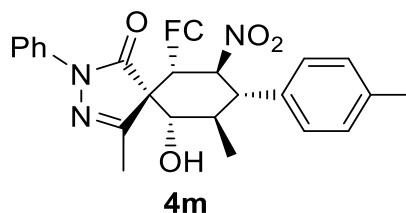

|                                             |                                                                                 |
|---------------------------------------------|---------------------------------------------------------------------------------|
| Empirical formula                           | C <sub>35</sub> H <sub>34</sub> Cl <sub>3</sub> FeN <sub>2</sub> O <sub>4</sub> |
| Formula weight                              | 708.84                                                                          |
| Temperature/K                               | 294.24(10)                                                                      |
| Crystal system                              | orthorhombic                                                                    |
| Space group                                 | P2 <sub>1</sub> 2 <sub>1</sub> 2 <sub>1</sub>                                   |
| a/Å                                         | 9.54049(16)                                                                     |
| b/Å                                         | 13.5186(2)                                                                      |
| c/Å                                         | 26.0238(5)                                                                      |
| α/°                                         | 90                                                                              |
| β/°                                         | 90                                                                              |
| γ/°                                         | 90                                                                              |
| Volume/Å <sup>3</sup>                       | 3356.40(10)                                                                     |
| Z                                           | 4                                                                               |
| ρ <sub>calc</sub> /cm <sup>3</sup>          | 1.403                                                                           |
| μ/mm <sup>-1</sup>                          | 6.132                                                                           |
| F(000)                                      | 1468.0                                                                          |
| Crystal size/mm <sup>3</sup>                | 0.65 × 0.3 × 0.25                                                               |
| Radiation                                   | CuKα (λ = 1.54184)                                                              |
| 2θ range for data collection/°              | 9.434 to 145.112                                                                |
| Index ranges                                | -11 ≤ h ≤ 7, -16 ≤ k ≤ 14, -32 ≤ l ≤ 31                                         |
| Reflections collected                       | 18187                                                                           |
| Independent reflections                     | 6542 [R <sub>int</sub> = 0.0428, R <sub>sigma</sub> = 0.0457]                   |
| Data/restraints/parameters                  | 6542/0/410                                                                      |
| Goodness-of-fit on F <sup>2</sup>           | 1.028                                                                           |
| Final R indexes [I ≥ 2σ (I)]                | R <sub>1</sub> = 0.0626, wR <sub>2</sub> = 0.1645                               |
| Final R indexes [all data]                  | R <sub>1</sub> = 0.0776, wR <sub>2</sub> = 0.1788                               |
| Largest diff. peak/hole / e Å <sup>-3</sup> | 0.61/-0.72                                                                      |
| Flack parameter                             | -0.001(4)                                                                       |

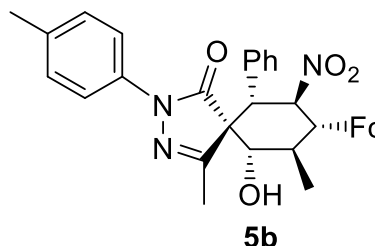S34

## 4 NMR spectra and HPLC chromatograms

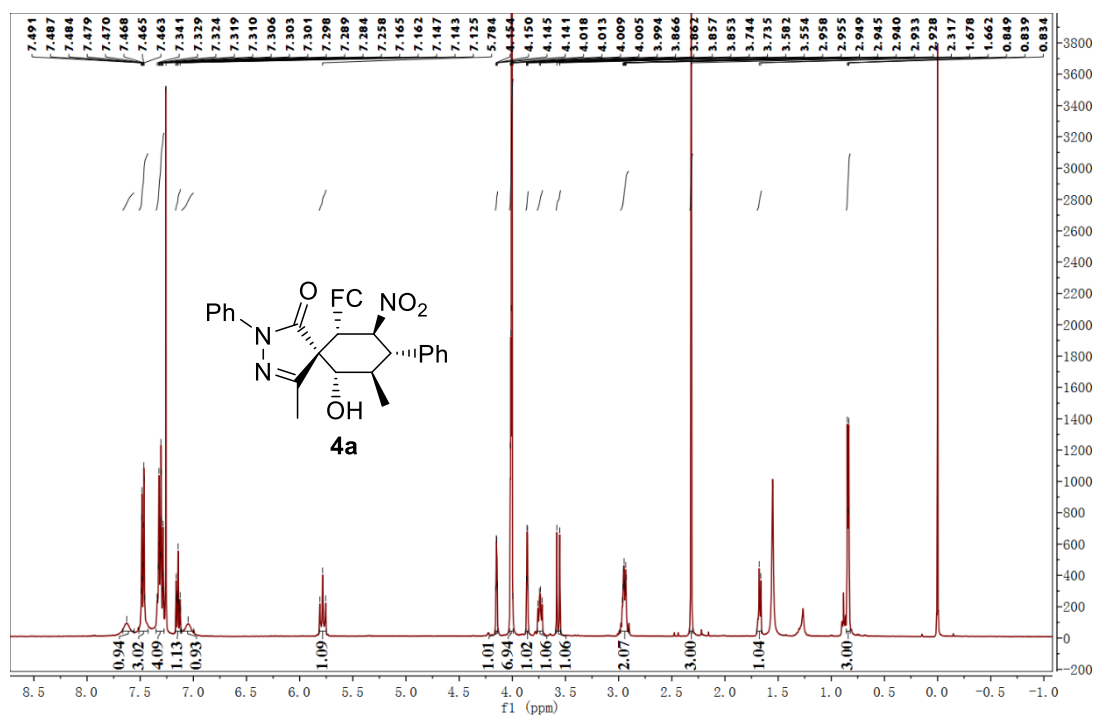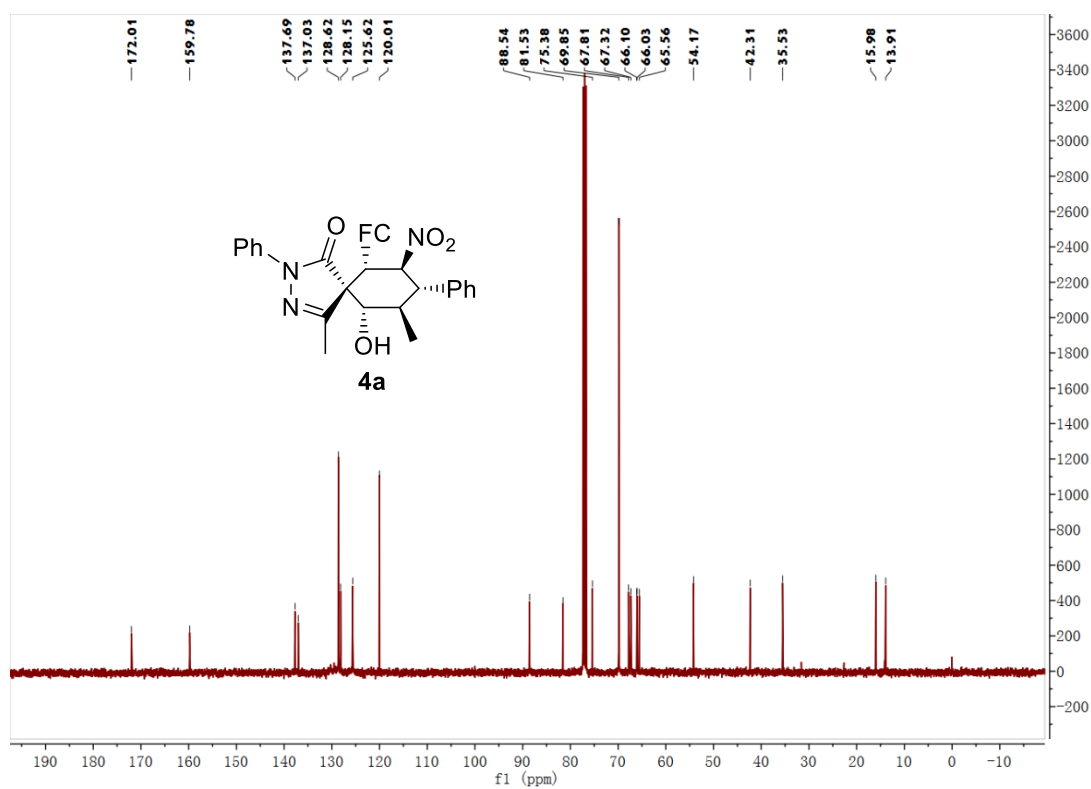

# <Chromatogram>

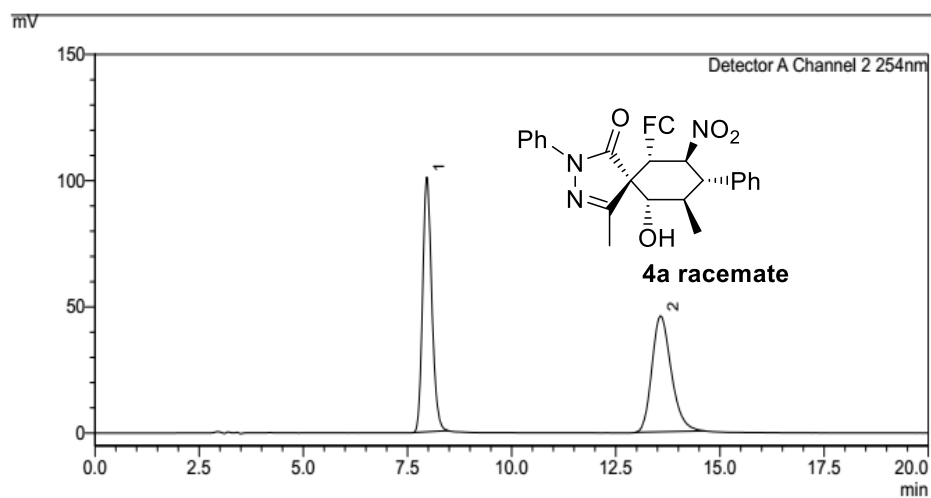

## <Peak Table>

Detector A Channel 2 254nm

| Peak# | Ret. Time | Area    | Height | Conc.  | Area%   |
|-------|-----------|---------|--------|--------|---------|
| 1     | 7.964     | 1541964 | 100905 | 50.951 | 50.951  |
| 2     | 13.575    | 1484402 | 45867  | 49.049 | 49.049  |
| Total |           | 3026367 | 146772 |        | 100.000 |

# <Chromatogram>

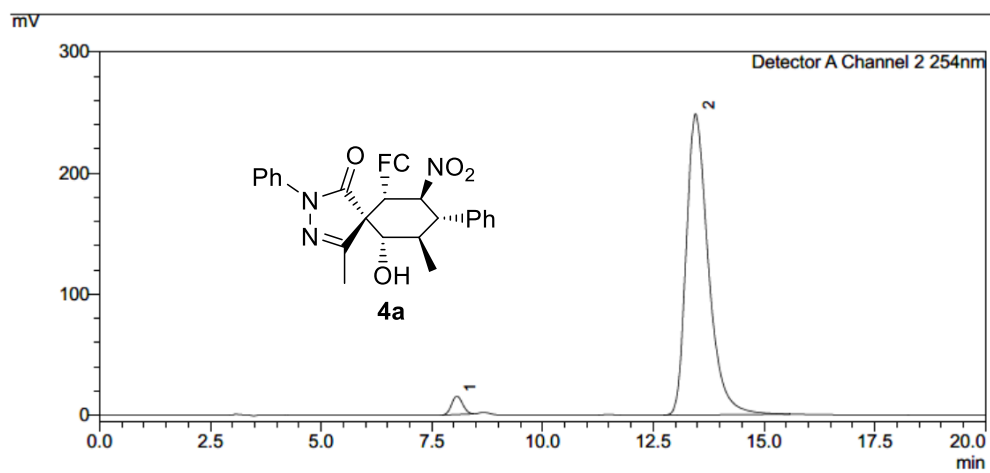

## <Peak Table>

Detector A Channel 2 254nm

| Peak# | Ret. Time | Area    | Height | Conc.  | Area%   |
|-------|-----------|---------|--------|--------|---------|
| 1     | 8.083     | 261182  | 15161  | 2.945  | 2.945   |
| 2     | 13.453    | 8608073 | 248482 | 97.055 | 97.055  |
| Total |           | 8869254 | 263643 |        | 100.000 |



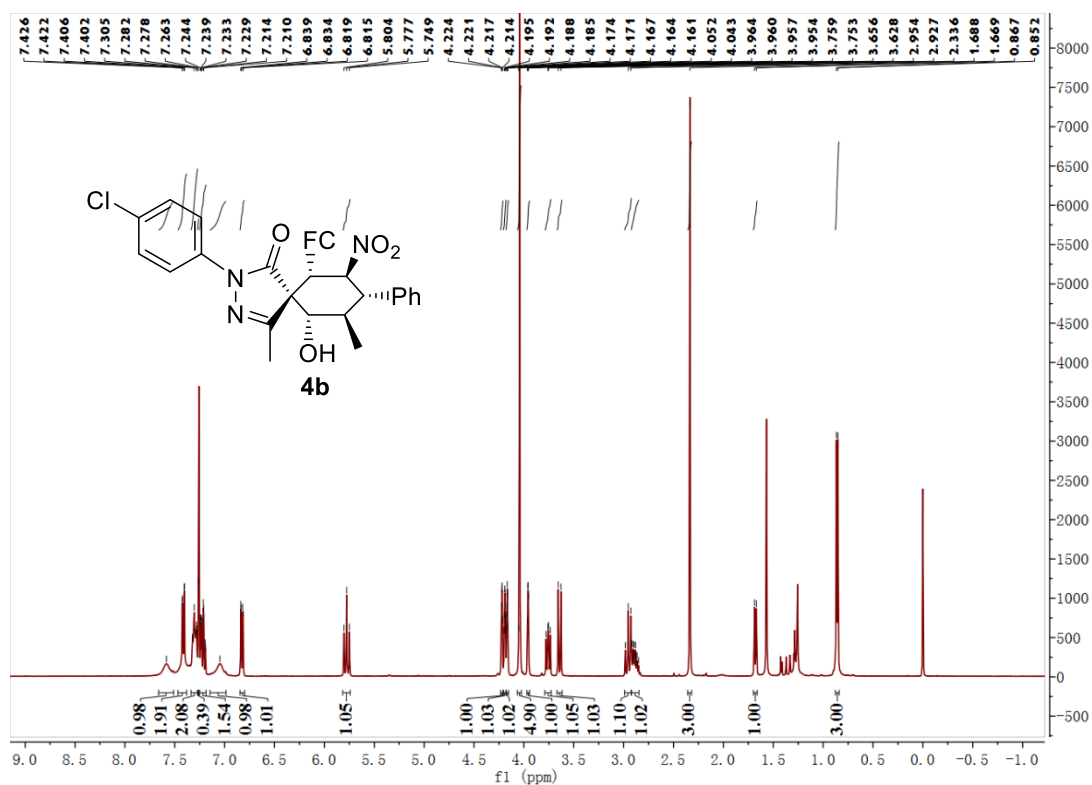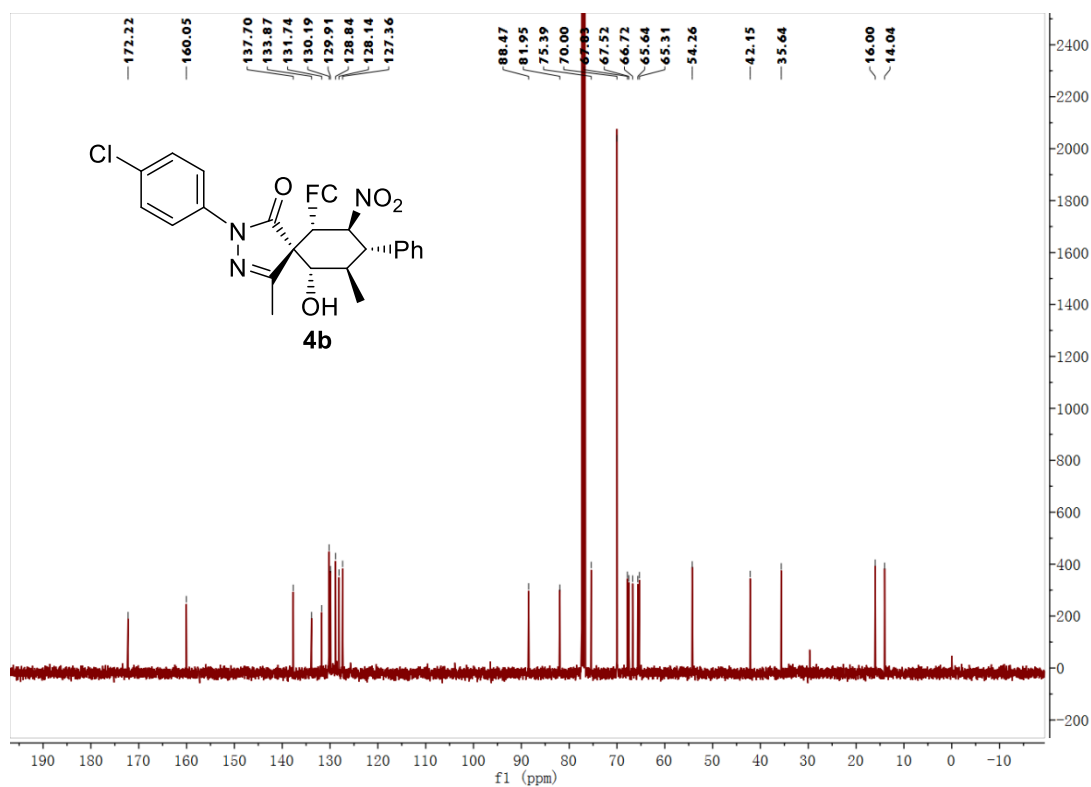

Chemical structure of **4b racemate** is shown, featuring a 4-chlorophenyl group, a nitro group, a phenyl group, a hydroxyl group, and a formyl group on a cyclohexane ring, connected via a diazolidine moiety.

| Detector A Channel 2 254nm |           |         |        |        |         |
|----------------------------|-----------|---------|--------|--------|---------|
| Peak#                      | Ret. Time | Area    | Height | Conc.  | Area%   |
| 1                          | 23.461    | 1330575 | 15372  | 50.150 | 50.150  |
| 2                          | 37.599    | 1322606 | 10203  | 49.850 | 49.850  |
| Total                      |           | 2653181 | 25575  |        | 100.000 |

Chromatogram showing the separation of compound **4b**. The x-axis represents time in minutes (0 to 60), and the y-axis represents signal intensity in mV (0 to 100). A major peak is observed at 23.1 minutes, and a minor peak is observed at 38.2 minutes. The chemical structure of **4b** is shown as an inset.

O=C1N(c2ccc(Cl)cc2)C(=O)N1[C@H]3C[C@@H](O)[C@H](c4ccccc4)[C@H]3C(F)(F)F

**4b**

| Peak# | Ret. Time | Area    | Height | Conc.  | Area%   |
|-------|-----------|---------|--------|--------|---------|
| 1     | 22.968    | 6290616 | 68702  | 96.665 | 96.665  |
| 2     | 38.217    | 217008  | 1709   | 3.335  | 3.335   |
| Total |           | 6507625 | 70411  |        | 100.000 |

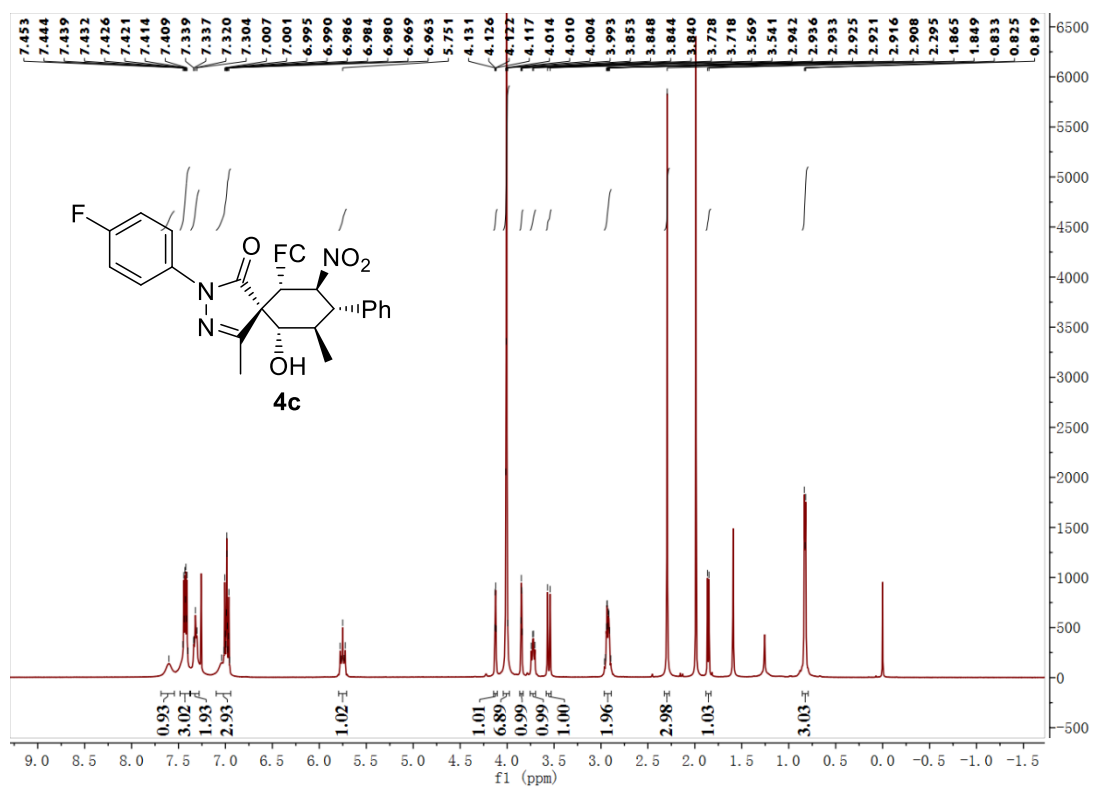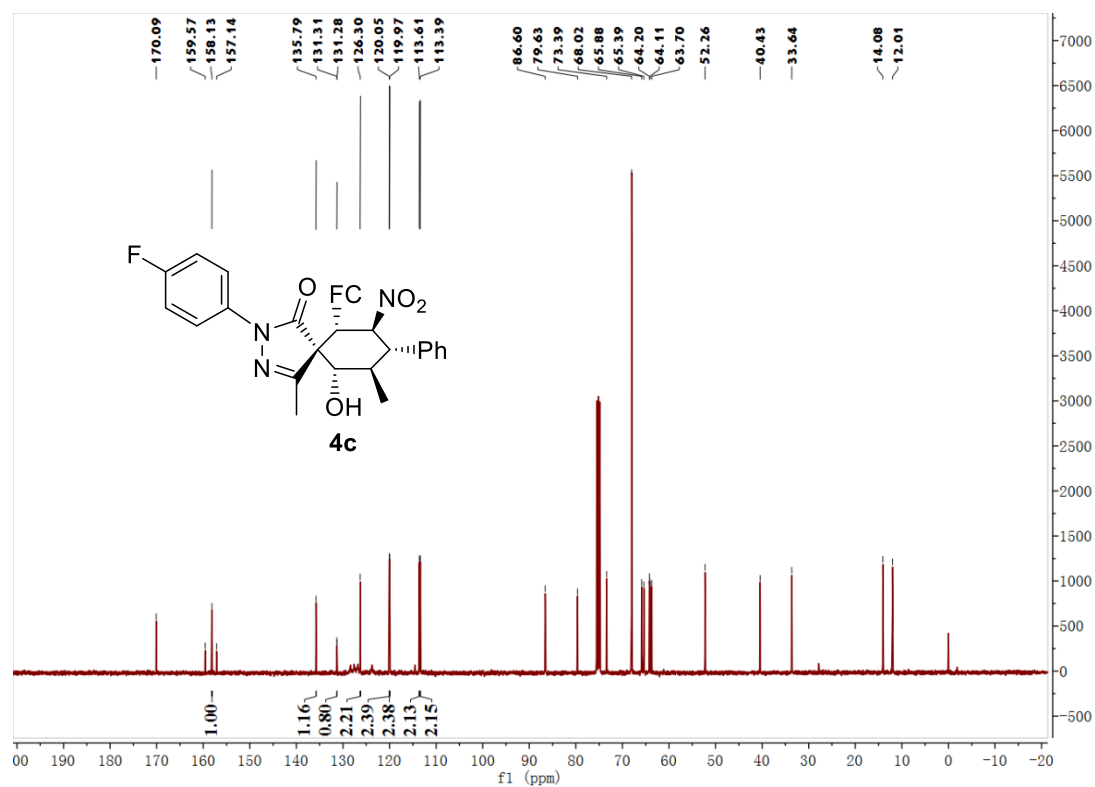

<Chromatogram>

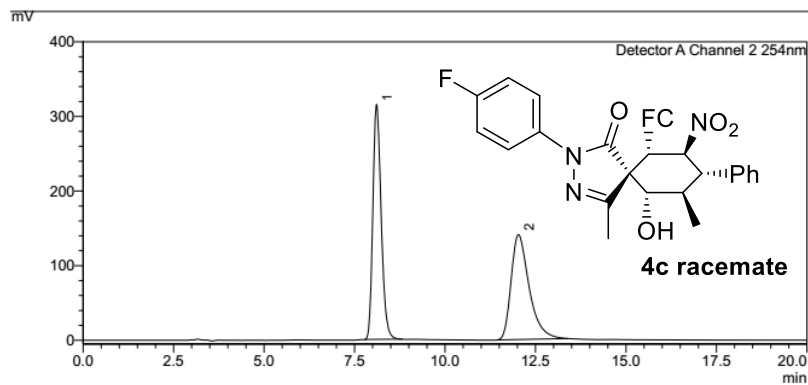

<Peak Table>

Detector A Channel 2 254nm

| Peak# | Ret. Time | Area    | Height | Conc.  | Area%   |
|-------|-----------|---------|--------|--------|---------|
| 1     | 8.109     | 5013190 | 314957 | 50.696 | 50.696  |
| 2     | 12.029    | 4875524 | 140589 | 49.304 | 49.304  |
| Total |           | 9888713 | 455546 |        | 100.000 |

<Chromatogram>

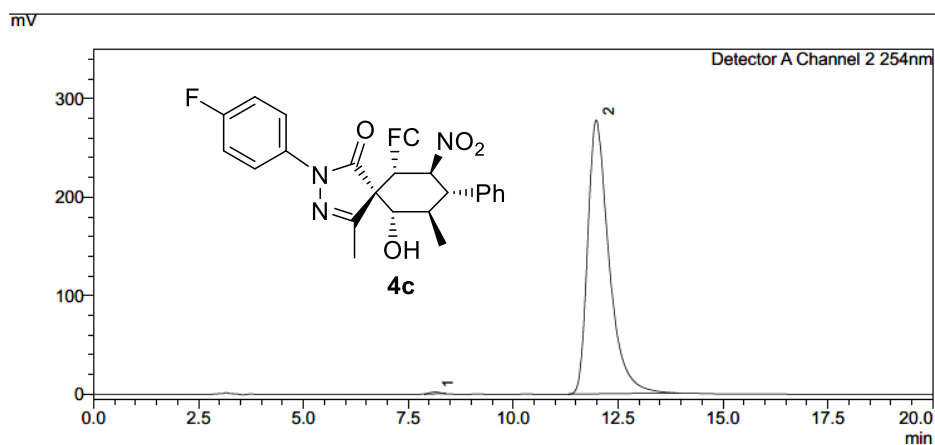

<Peak Table>

Detector A Channel 2 254nm

| Peak# | Ret. Time | Area    | Height | Conc.  | Area%   |
|-------|-----------|---------|--------|--------|---------|
| 1     | 8.155     | 29402   | 1907   | 0.299  | 0.299   |
| 2     | 11.979    | 9809138 | 278101 | 99.701 | 99.701  |
| Total |           | 9838539 | 280008 |        | 100.000 |

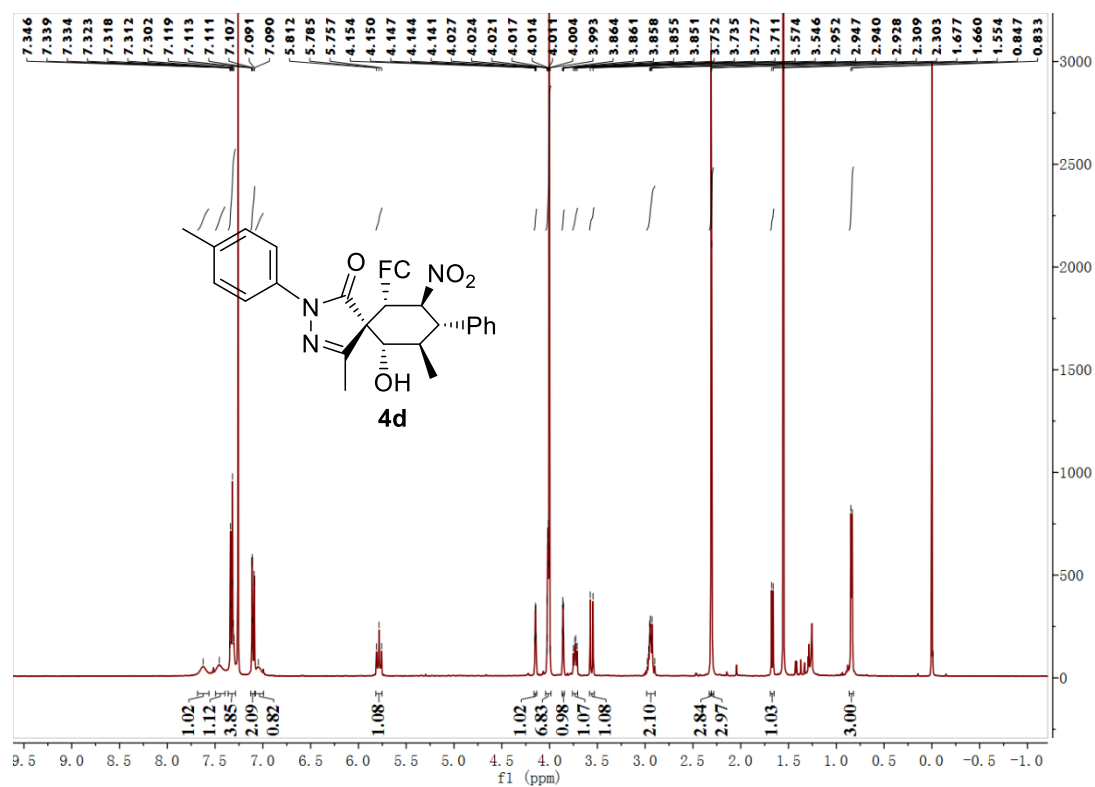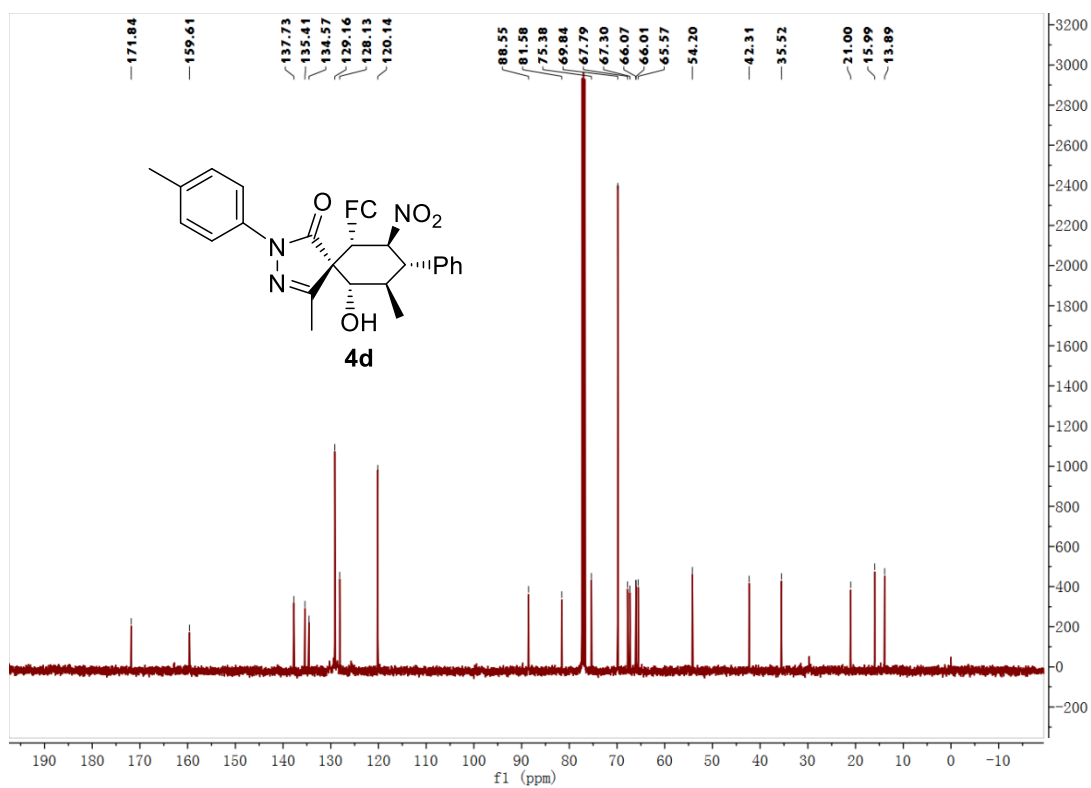

# <Chromatogram>

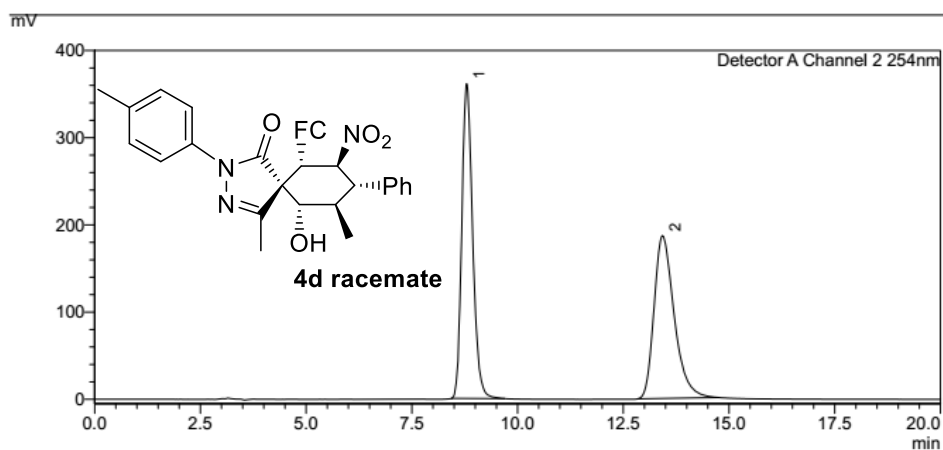

## <Peak Table>

Detector A Channel 2 254nm

| Peak# | Ret. Time | Area     | Height | Conc.  | Area%   |
|-------|-----------|----------|--------|--------|---------|
| 1     | 8.797     | 6424165  | 360845 | 50.989 | 50.989  |
| 2     | 13.429    | 6174928  | 186589 | 49.011 | 49.011  |
| Total |           | 12599093 | 547435 |        | 100.000 |

# <Chromatogram>

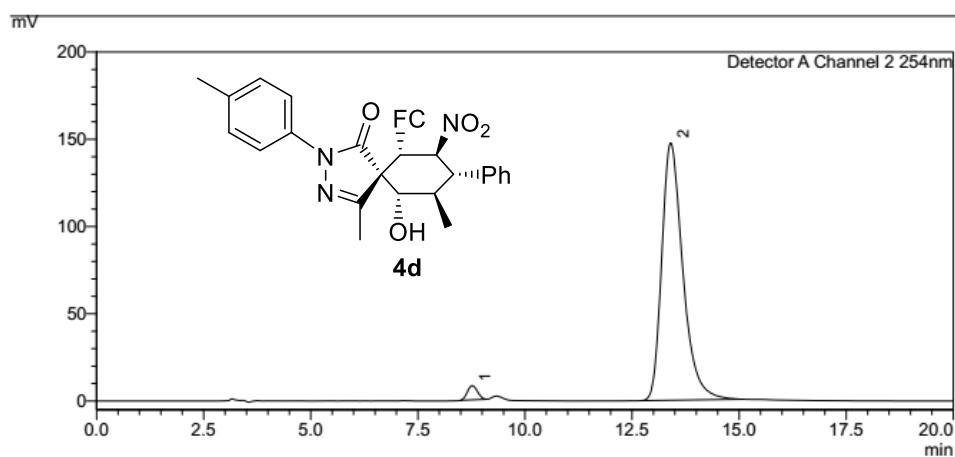

## <Peak Table>

Detector A Channel 2 254nm

| Peak# | Ret. Time | Area    | Height | Conc.  | Area%   |
|-------|-----------|---------|--------|--------|---------|
| 1     | 8.768     | 132256  | 8137   | 2.555  | 2.555   |
| 2     | 13.402    | 5044208 | 147511 | 97.445 | 97.445  |
| Total |           | 5176464 | 155648 |        | 100.000 |

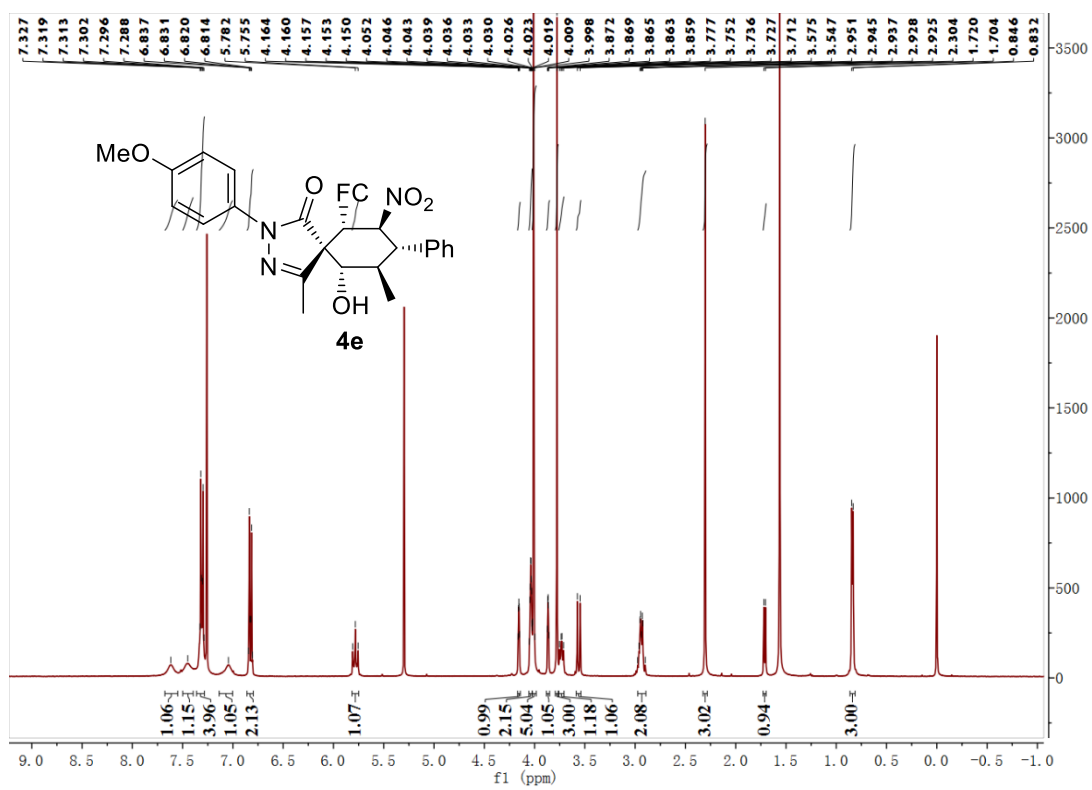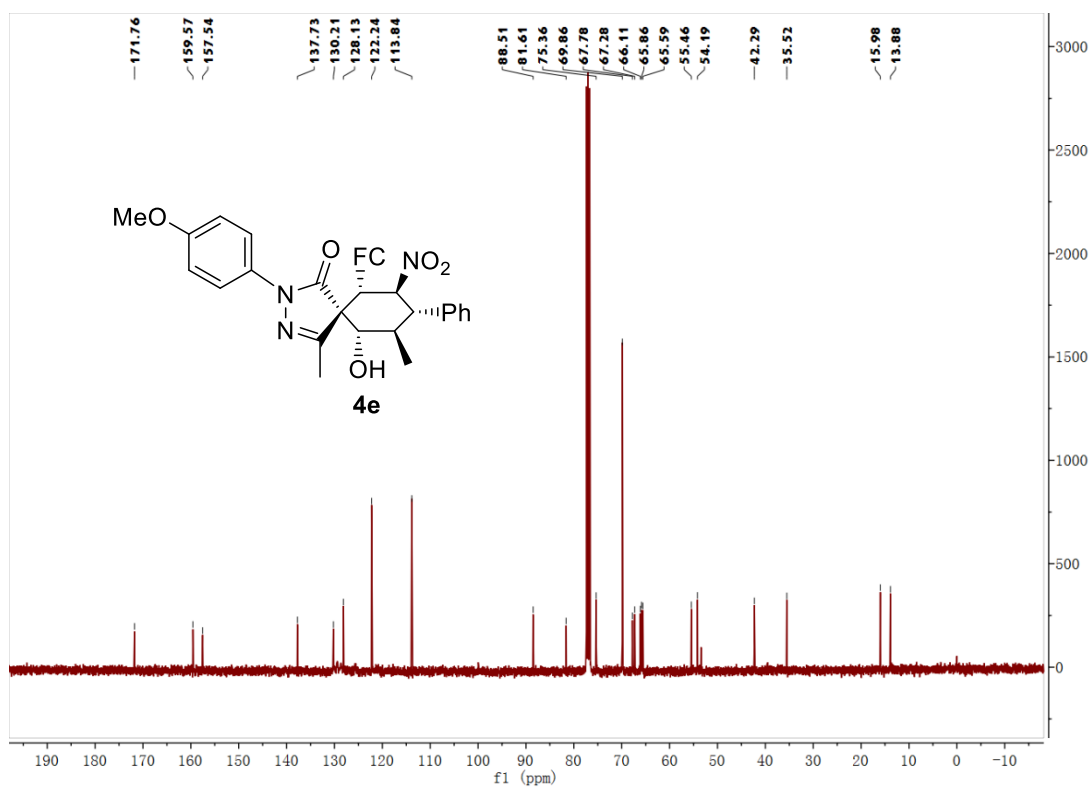

# <Chromatogram>

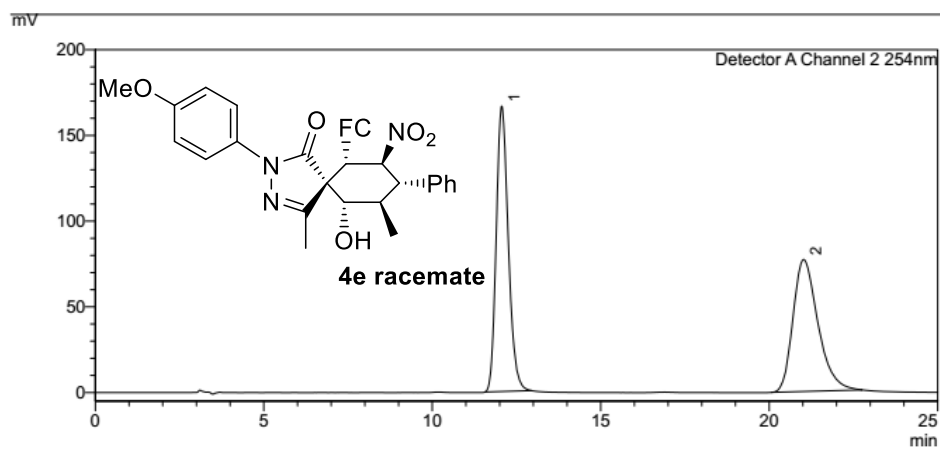

## <Peak Table>

Detector A Channel 2 254nm

| Peak# | Ret. Time | Area    | Height | Conc.  | Area%   |
|-------|-----------|---------|--------|--------|---------|
| 1     | 12.062    | 4134118 | 166518 | 51.069 | 51.069  |
| 2     | 21.023    | 3961028 | 77018  | 48.931 | 48.931  |
| Total |           | 8095146 | 243536 |        | 100.000 |

# <Chromatogram>

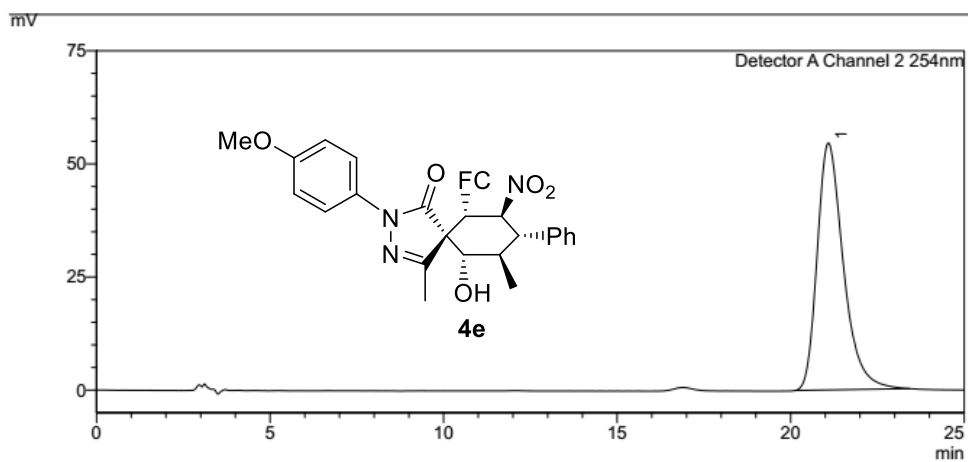

## <Peak Table>

Detector A Channel 2 254nm

| Peak# | Ret. Time | Area    | Height | Conc.   | Area%   |
|-------|-----------|---------|--------|---------|---------|
| 1     | 21.088    | 2865704 | 54610  | 100.000 | 100.000 |
| Total |           | 2865704 | 54610  |         | 100.000 |



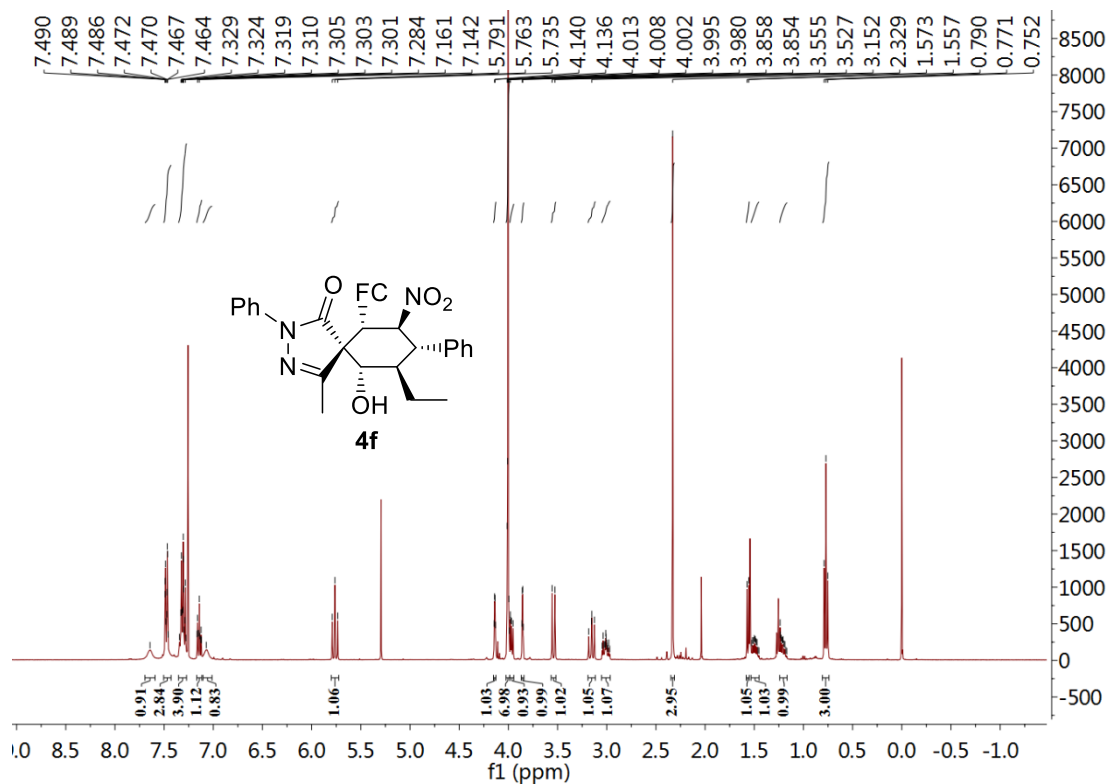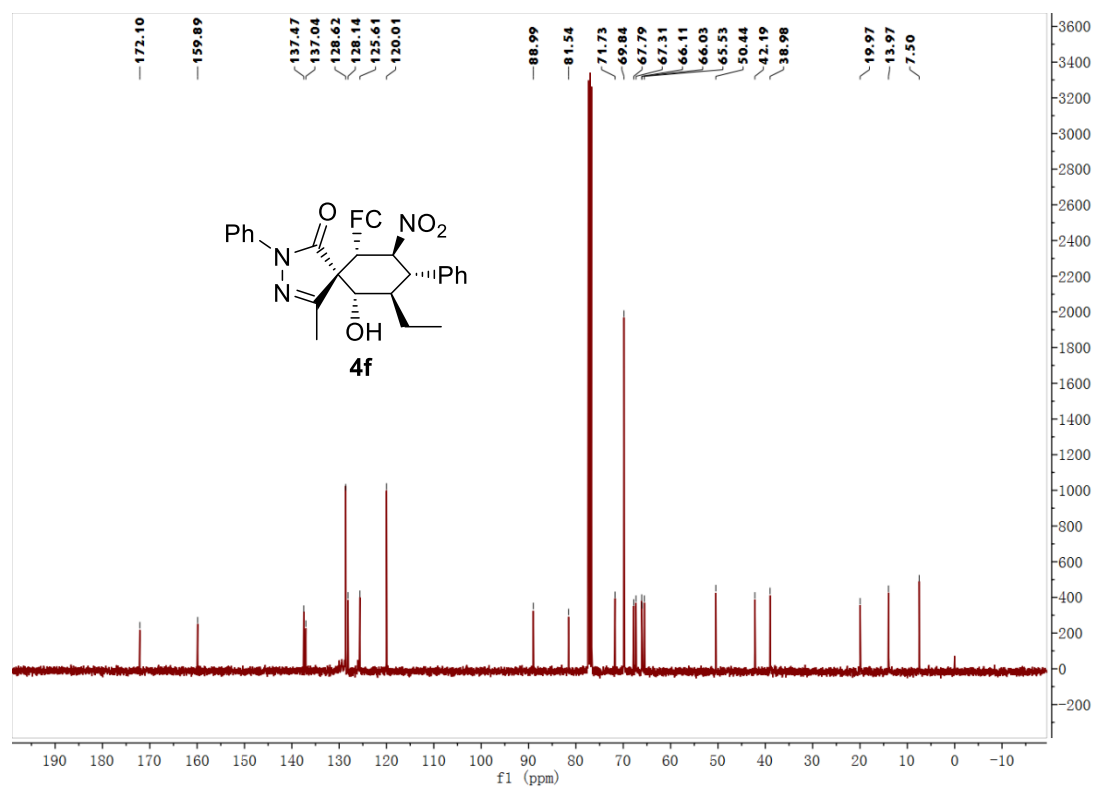

<Chromatogram>

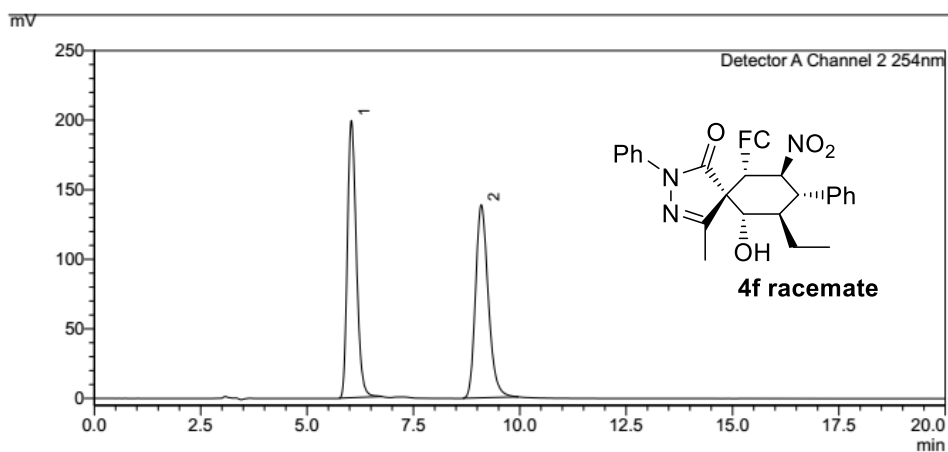

<Peak Table>

| Detector A Channel 2 254nm |           |         |        |        |         |
|----------------------------|-----------|---------|--------|--------|---------|
| Peak#                      | Ret. Time | Area    | Height | Conc.  | Area%   |
| 1                          | 6.042     | 2901768 | 199280 | 50.081 | 50.081  |
| 2                          | 9.095     | 2892325 | 138731 | 49.919 | 49.919  |
| Total                      |           | 5794093 | 338011 |        | 100.000 |

<Chromatogram>

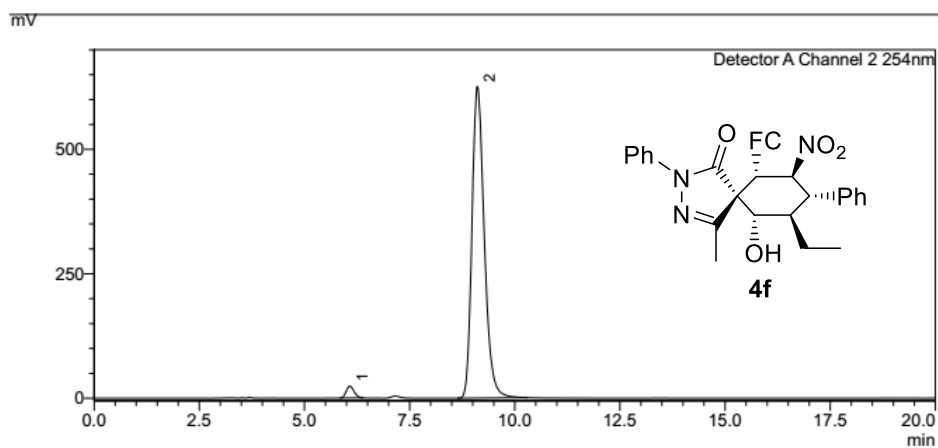

<Peak Table>

| Detector A Channel 2 254nm |           |          |        |        |         |
|----------------------------|-----------|----------|--------|--------|---------|
| Peak#                      | Ret. Time | Area     | Height | Conc.  | Area%   |
| 1                          | 6.079     | 305504   | 23709  | 2.338  | 2.338   |
| 2                          | 9.111     | 12761424 | 626248 | 97.662 | 97.662  |
| Total                      |           | 13066927 | 649957 |        | 100.000 |

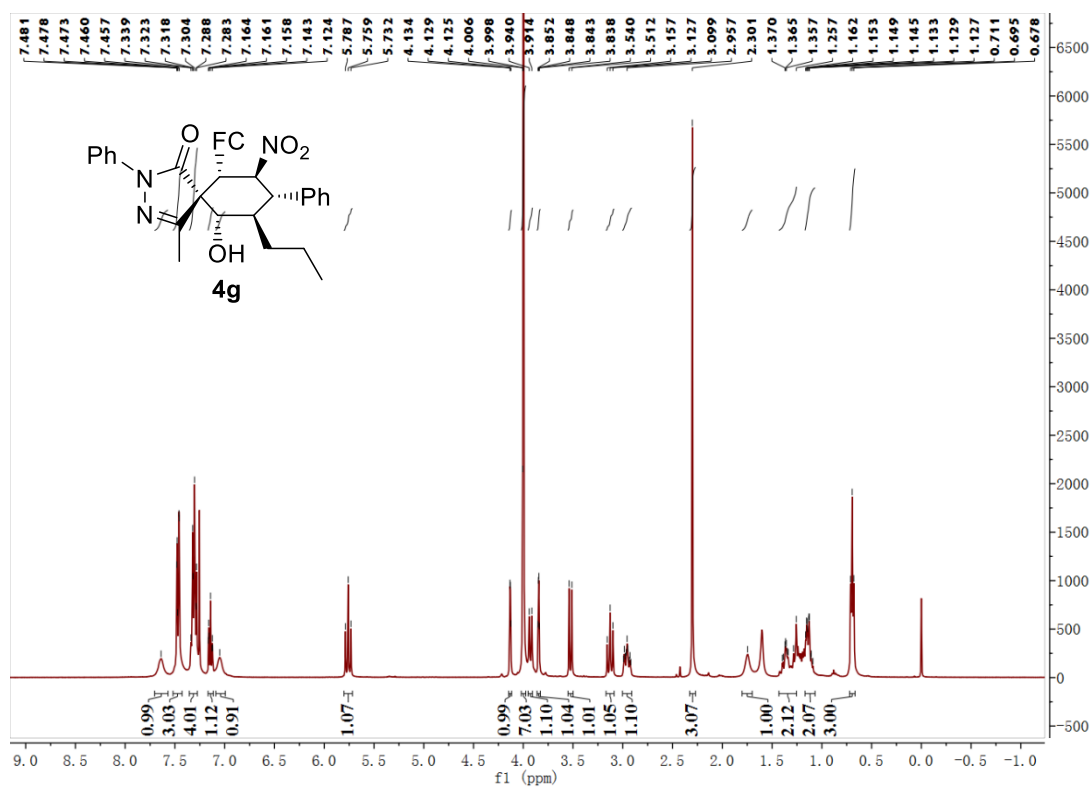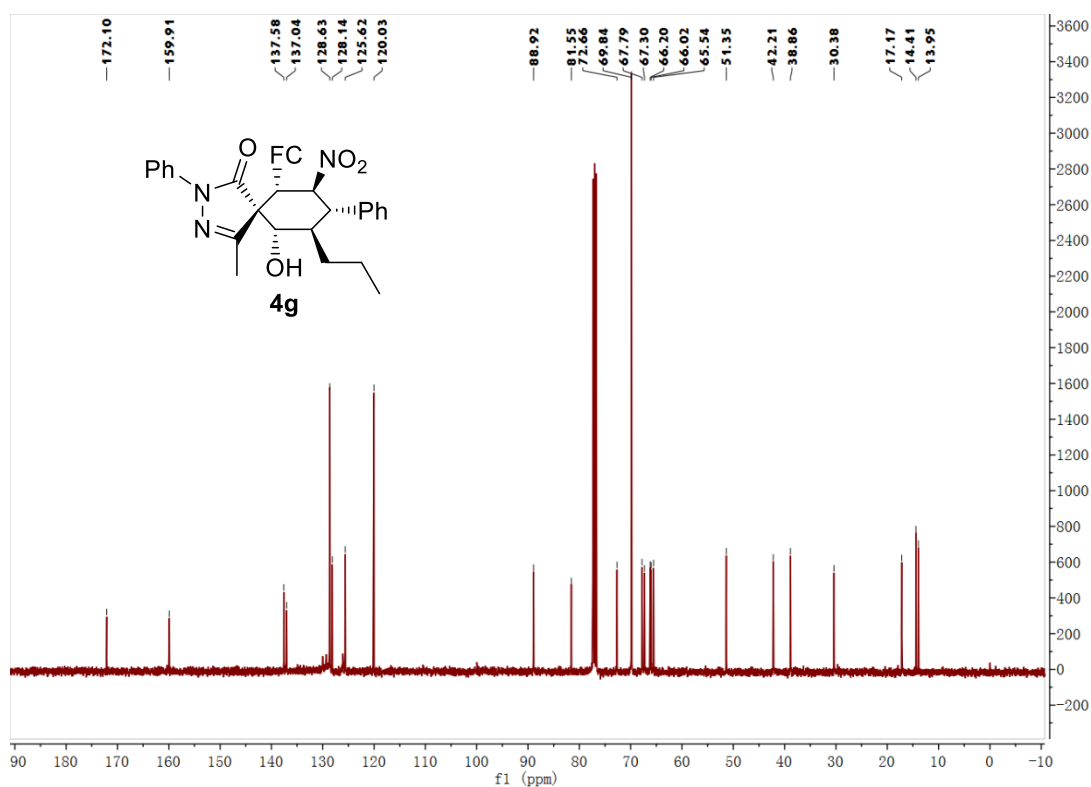

# <Chromatogram>

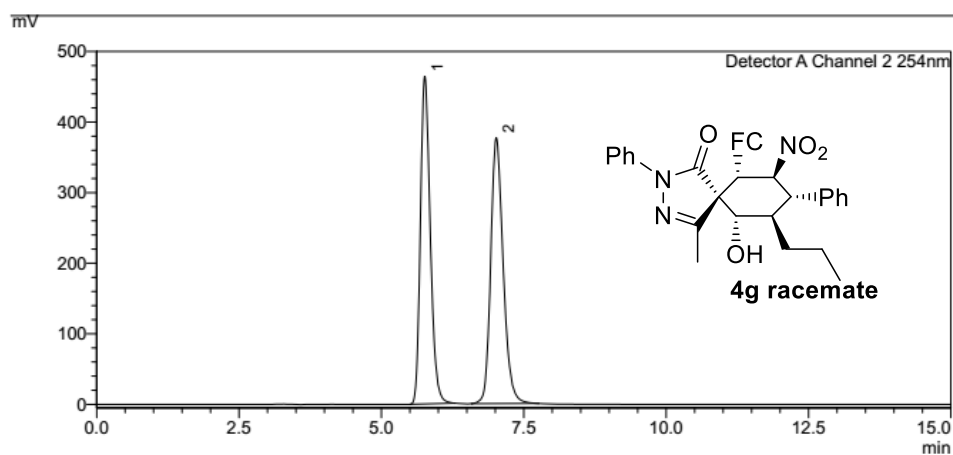

## <Peak Table>

| Detector A Channel 2 254nm |           |          |        |        |         |
|----------------------------|-----------|----------|--------|--------|---------|
| Peak#                      | Ret. Time | Area     | Height | Conc.  | Area%   |
| 1                          | 5.762     | 5573419  | 464272 | 49.210 | 49.210  |
| 2                          | 7.017     | 5752436  | 376933 | 50.790 | 50.790  |
| Total                      |           | 11325855 | 841206 |        | 100.000 |

# <Chromatogram>

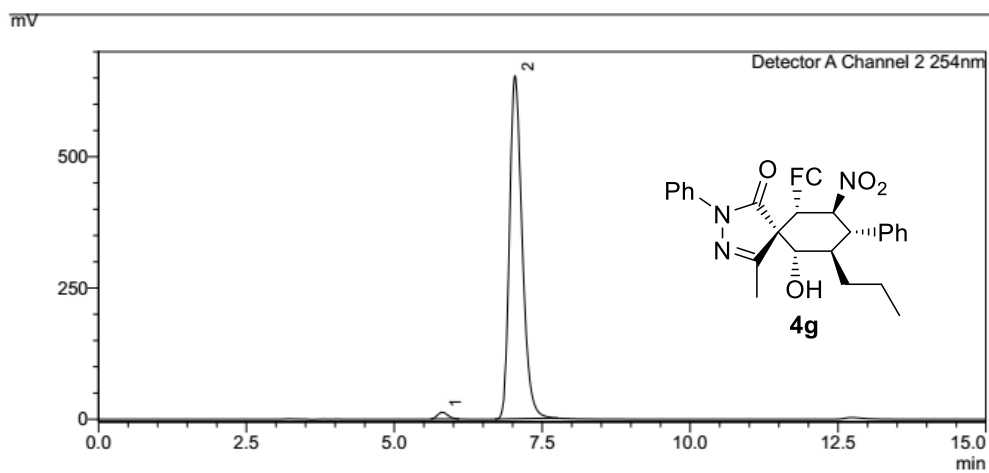

## <Peak Table>

| Detector A Channel 2 254nm |           |         |        |        |         |
|----------------------------|-----------|---------|--------|--------|---------|
| Peak#                      | Ret. Time | Area    | Height | Conc.  | Area%   |
| 1                          | 5.811     | 154043  | 12790  | 1.553  | 1.553   |
| 2                          | 7.040     | 9762495 | 653750 | 98.447 | 98.447  |
| Total                      |           | 9916538 | 666540 |        | 100.000 |

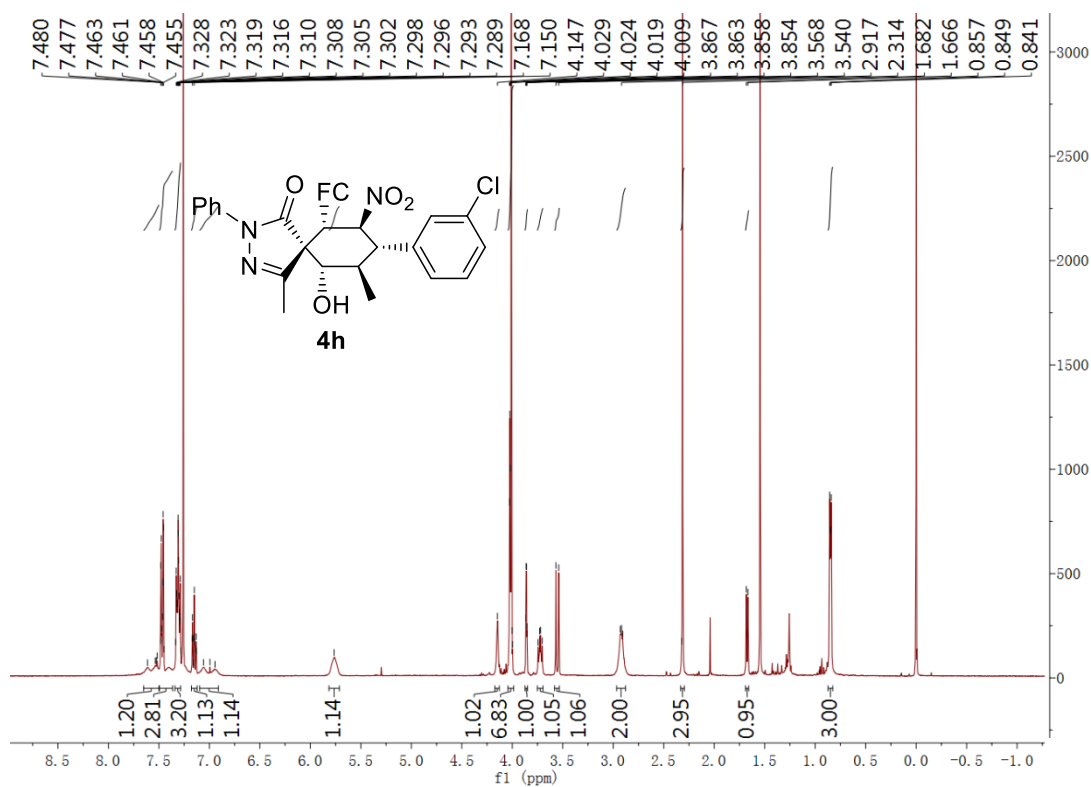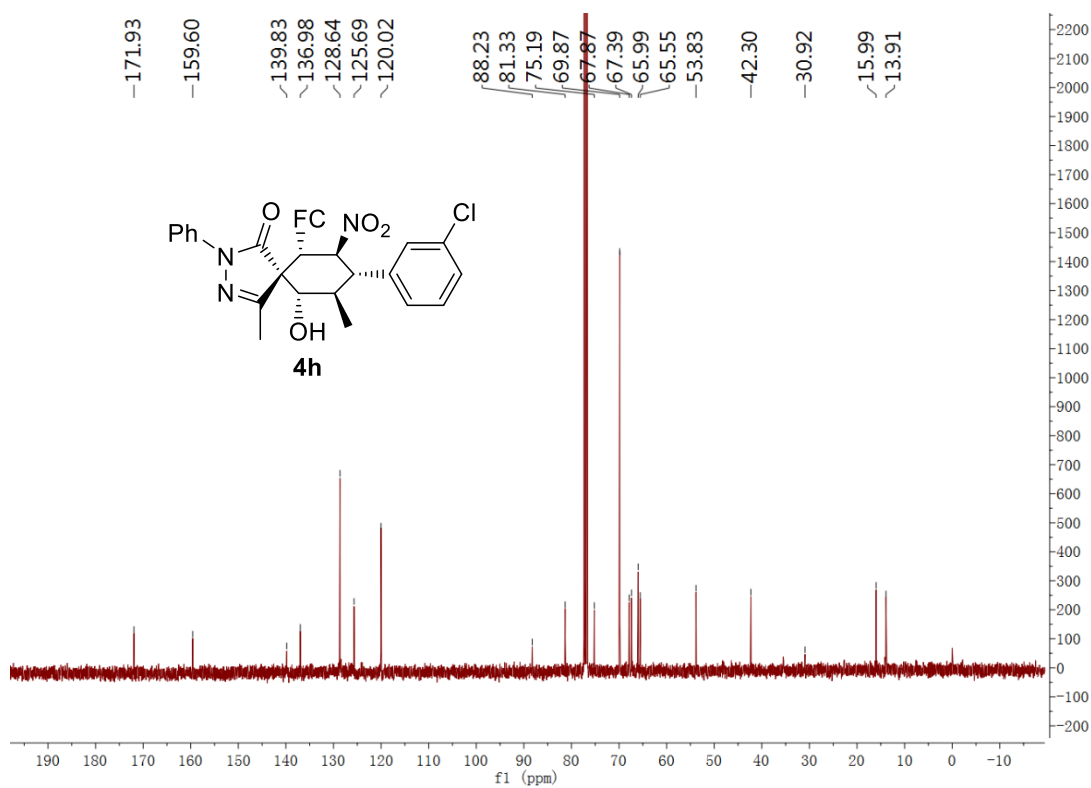

# <Chromatogram>

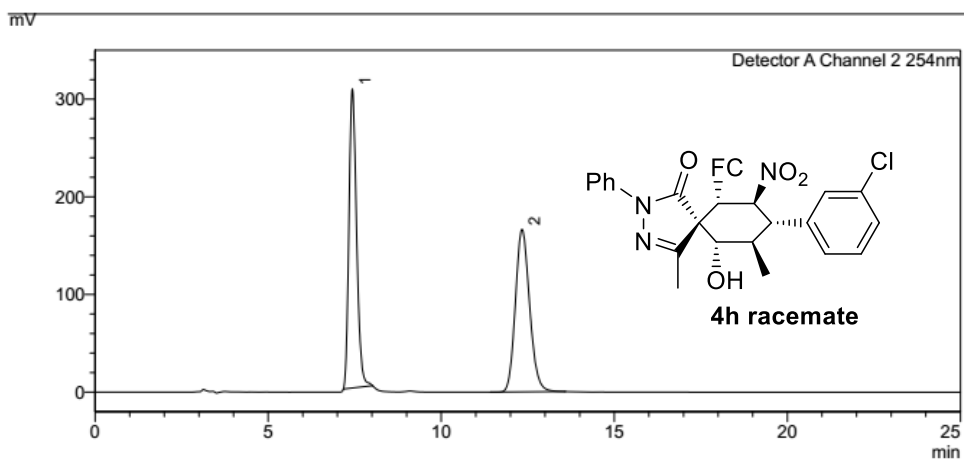

## <Peak Table>

Detector A Channel 2 254nm

| Peak# | Ret. Time | Area    | Height | Conc.  | Area%   |
|-------|-----------|---------|--------|--------|---------|
| 1     | 7.433     | 4669901 | 306107 | 49.514 | 49.514  |
| 2     | 12.335    | 4761626 | 166457 | 50.486 | 50.486  |
| Total |           | 9431527 | 472565 |        | 100.000 |

# <Chromatogram>

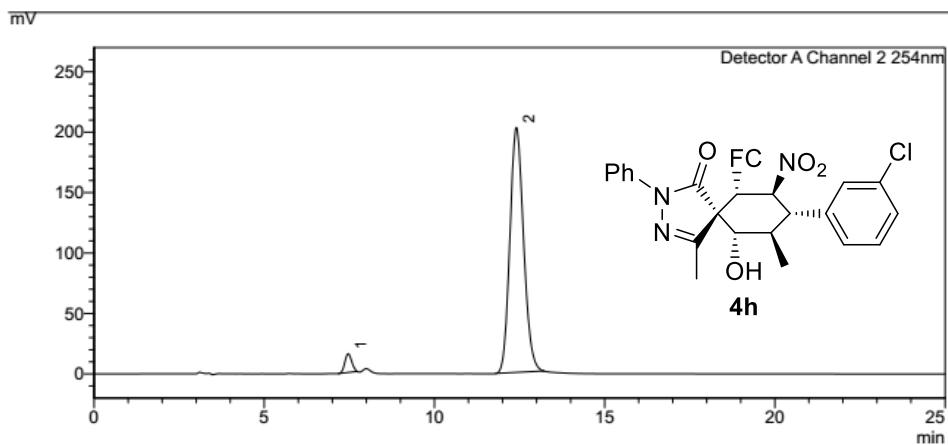

## <Peak Table>

Detector A Channel 2 254nm

| Peak# | Ret. Time | Area    | Height | Conc.  | Area%   |
|-------|-----------|---------|--------|--------|---------|
| 1     | 7.466     | 217318  | 15468  | 3.692  | 3.692   |
| 2     | 12.406    | 5669085 | 202753 | 96.308 | 96.308  |
| Total |           | 5886403 | 218221 |        | 100.000 |

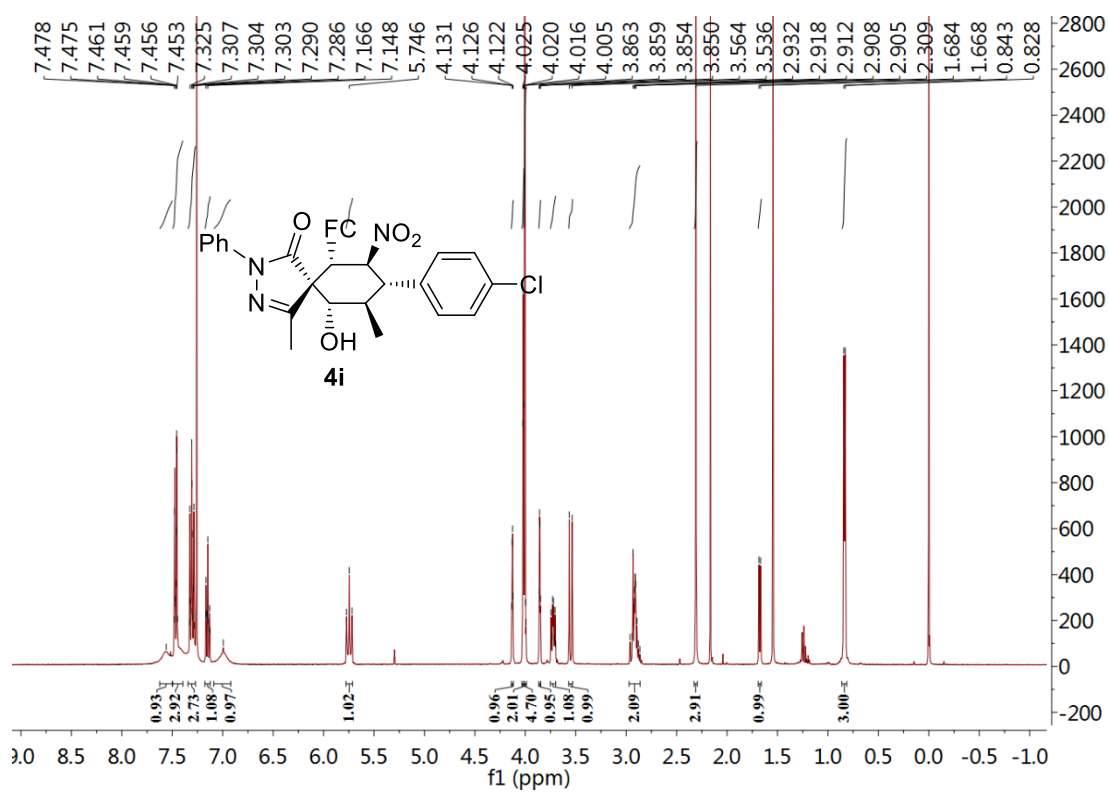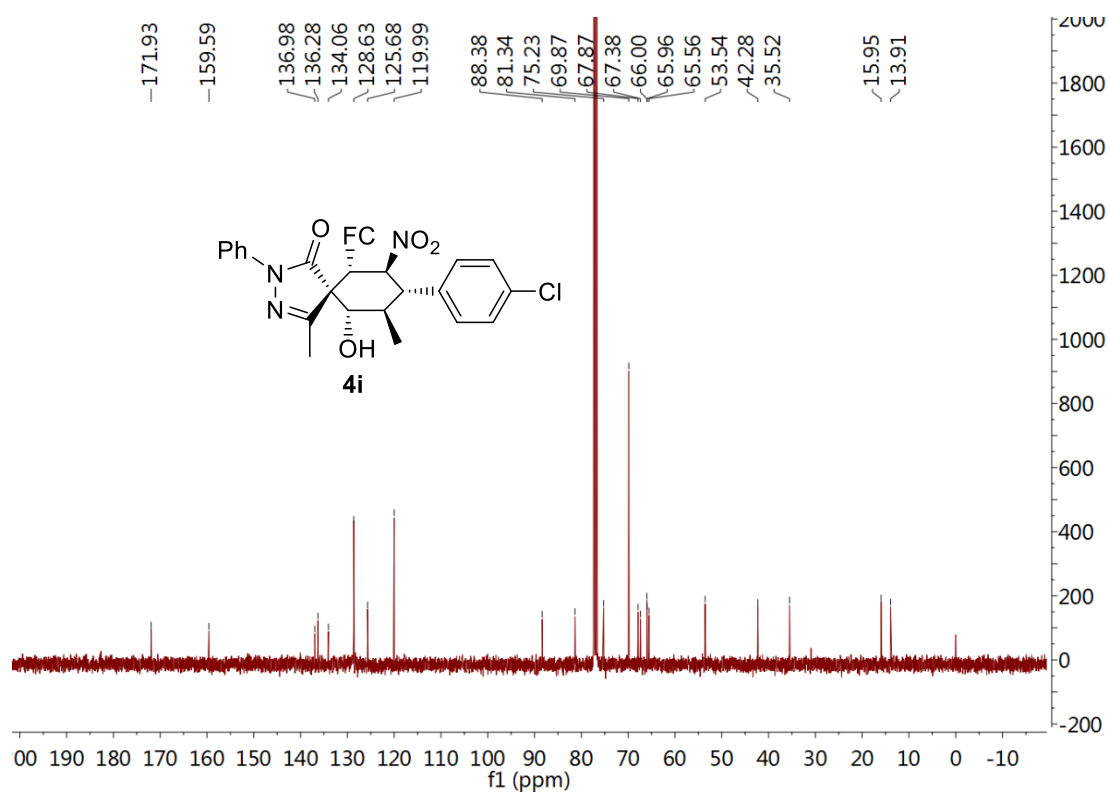

# <Chromatogram>

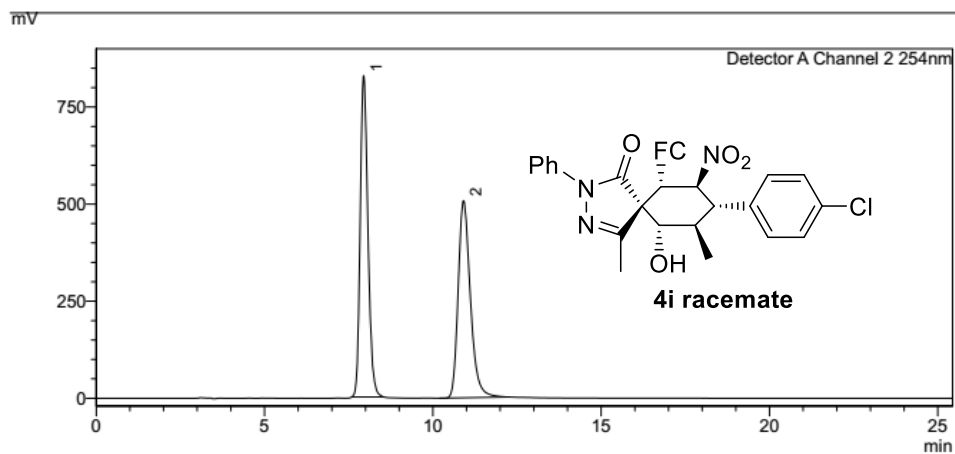

## <Peak Table>

Detector A Channel 2 254nm

| Peak# | Ret. Time | Area     | Height  | Conc.  | Area%   |
|-------|-----------|----------|---------|--------|---------|
| 1     | 7.945     | 13206475 | 827492  | 50.819 | 50.819  |
| 2     | 10.912    | 12780796 | 507796  | 49.181 | 49.181  |
| Total |           | 25987271 | 1335288 |        | 100.000 |

# <Chromatogram>

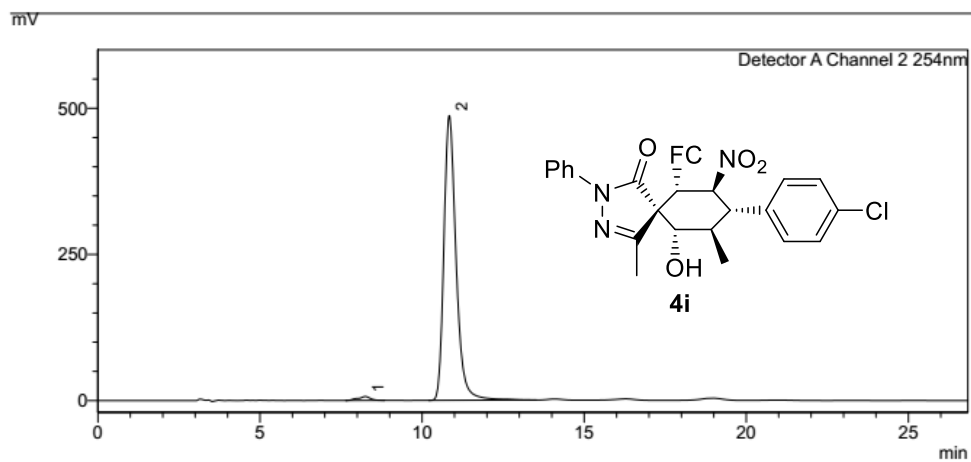

## <Peak Table>

Detector A Channel 2 254nm

| Peak# | Ret. Time | Area     | Height | Conc.  | Area%   |
|-------|-----------|----------|--------|--------|---------|
| 1     | 8.244     | 177042   | 6692   | 1.372  | 1.372   |
| 2     | 10.838    | 12727112 | 486946 | 98.628 | 98.628  |
| Total |           | 12904154 | 493638 |        | 100.000 |



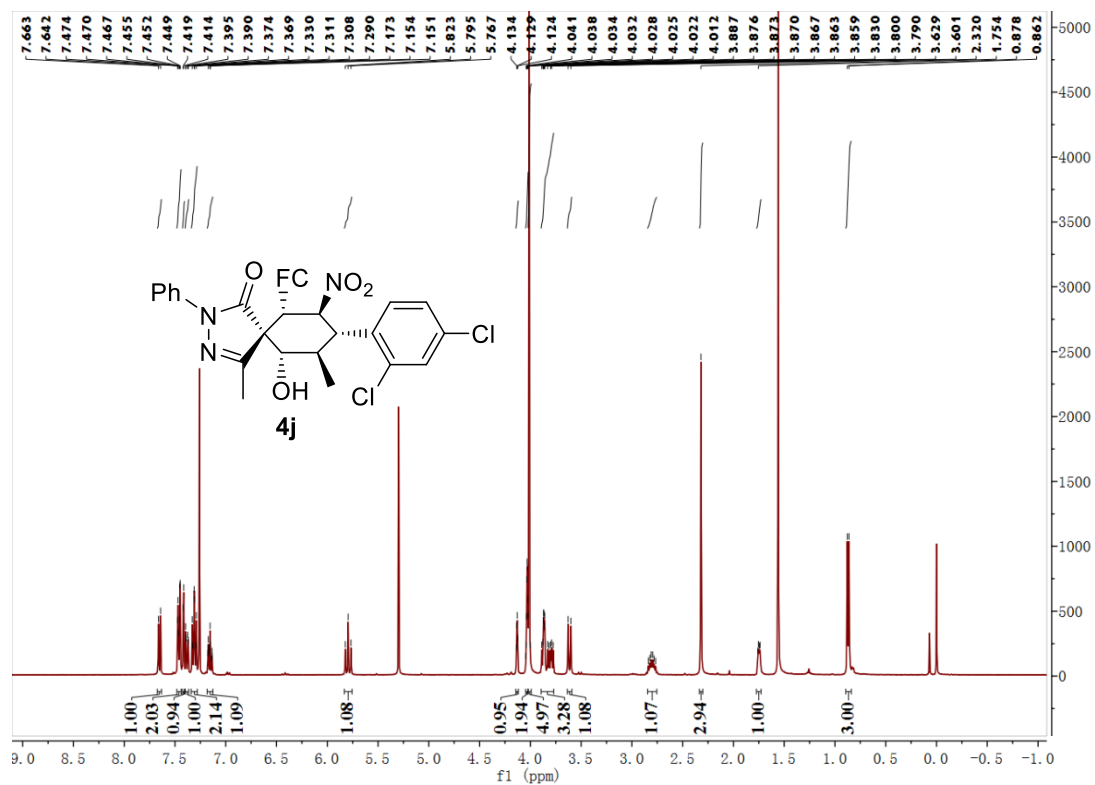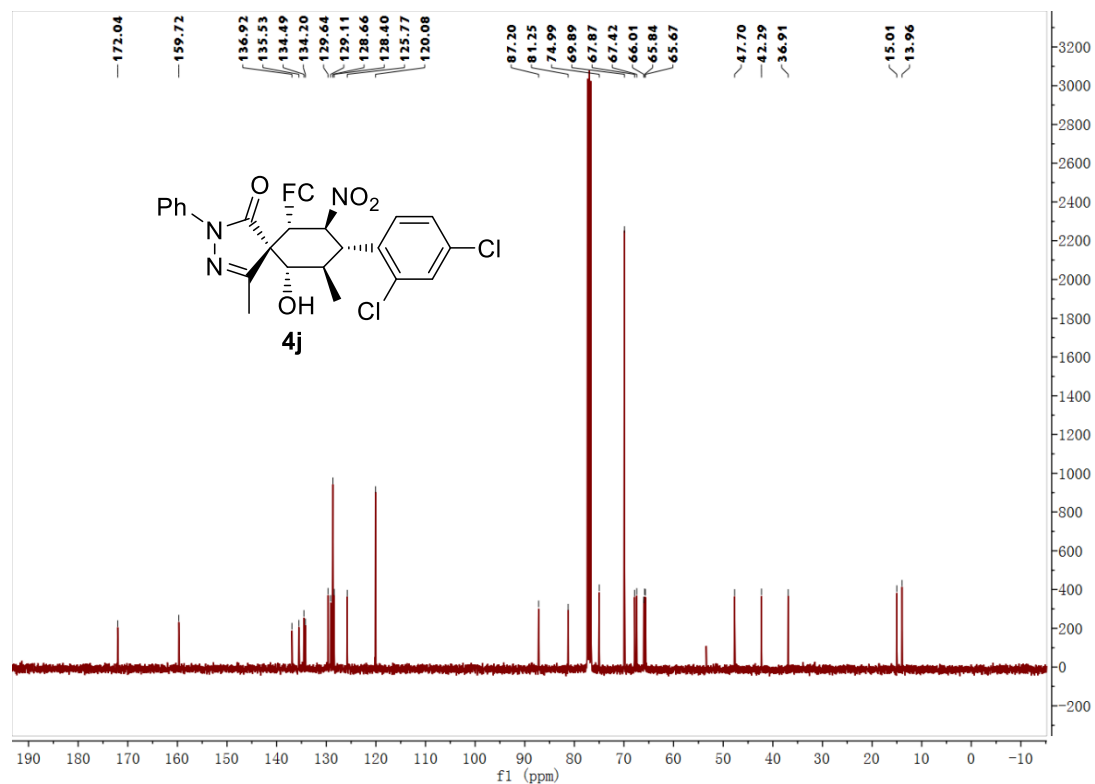

### <Chromatogram>

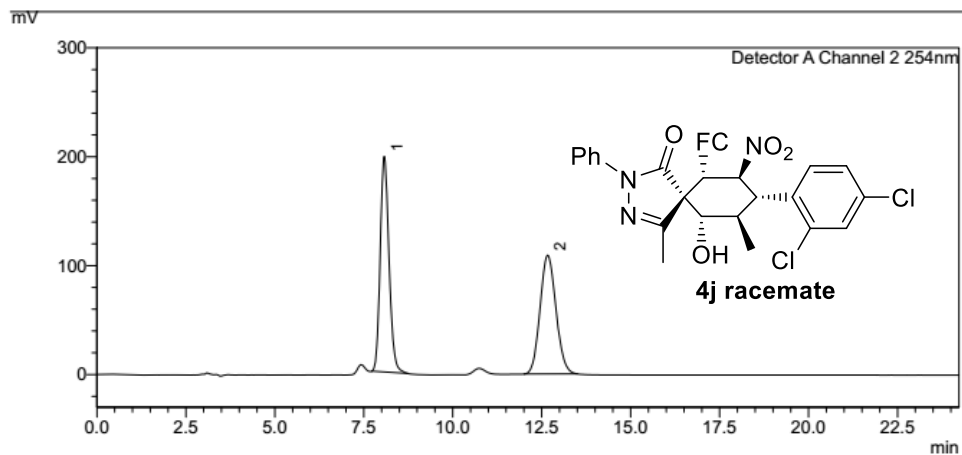

### <Peak Table>

Detector A Channel 2 254nm

| Peak# | Ret. Time | Area    | Height | Conc.  | Area%   |
|-------|-----------|---------|--------|--------|---------|
| 1     | 8.074     | 3397603 | 197824 | 50.114 | 50.114  |
| 2     | 12.667    | 3382177 | 108951 | 49.886 | 49.886  |
| Total |           | 6779780 | 306775 |        | 100.000 |

### <Chromatogram>

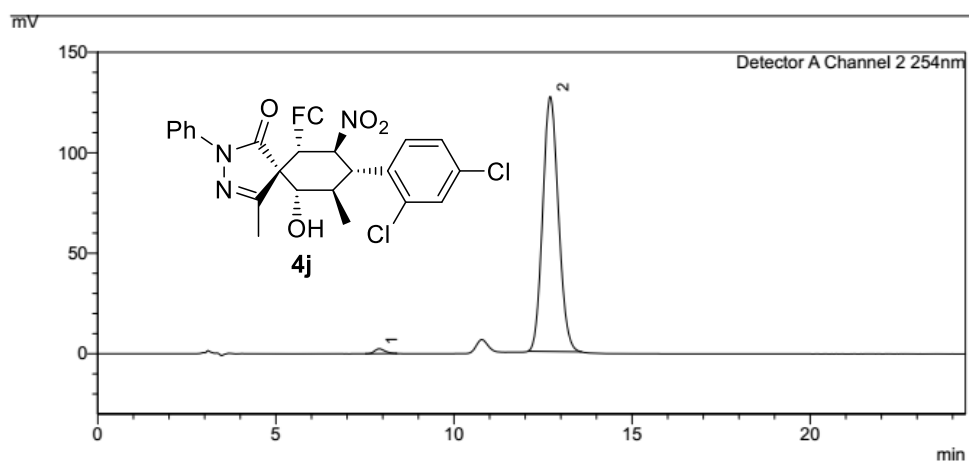

### <Peak Table>

Detector A Channel 2 254nm

| Peak# | Ret. Time | Area    | Height | Conc.  | Area%   |
|-------|-----------|---------|--------|--------|---------|
| 1     | 7.902     | 48976   | 2436   | 1.244  | 1.244   |
| 2     | 12.703    | 3889490 | 126878 | 98.756 | 98.756  |
| Total |           | 3938466 | 129314 |        | 100.000 |

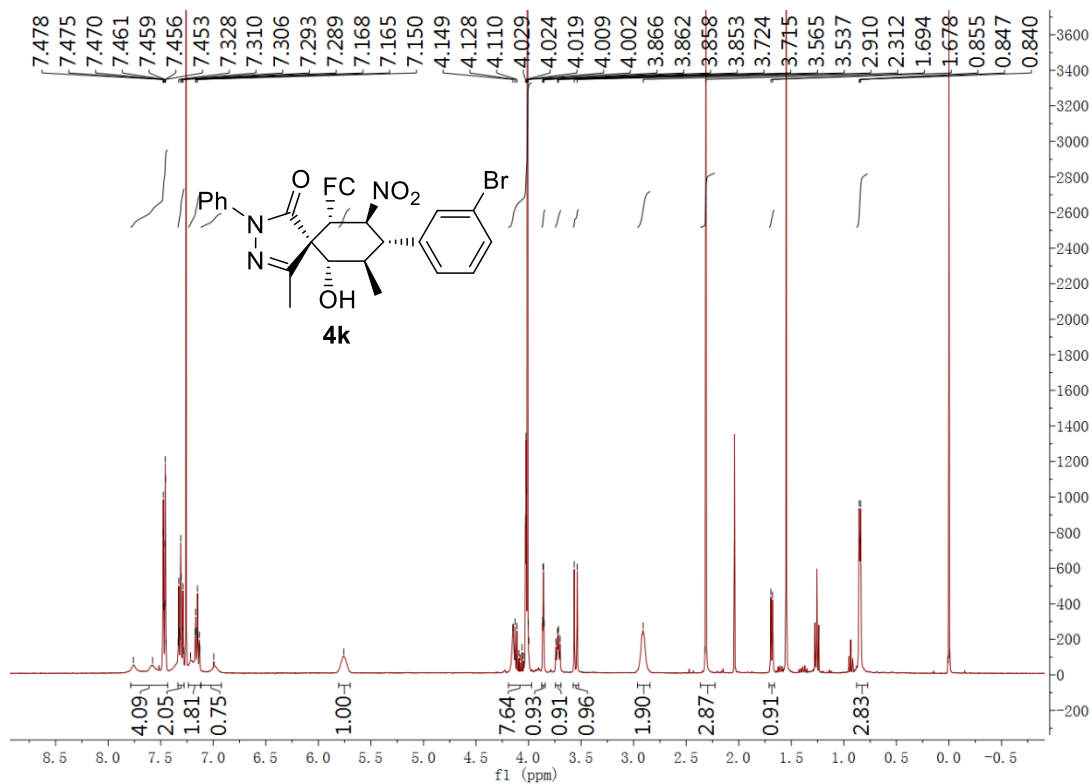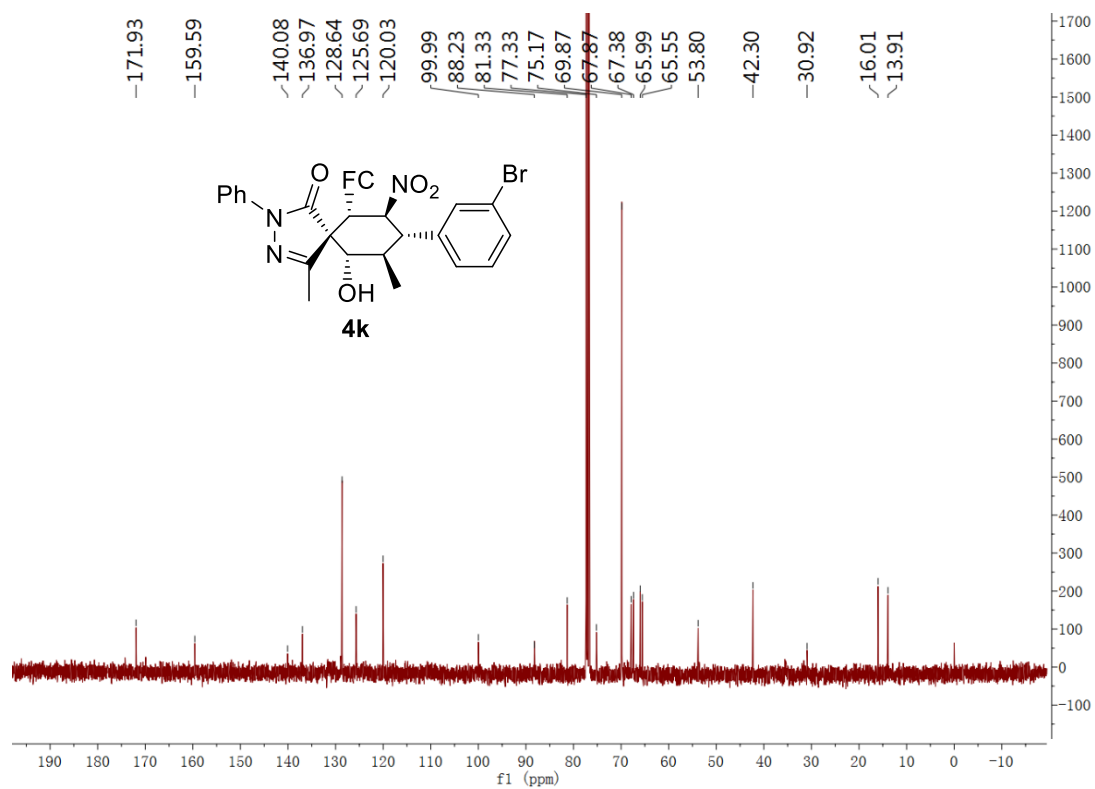

<Chromatogram>

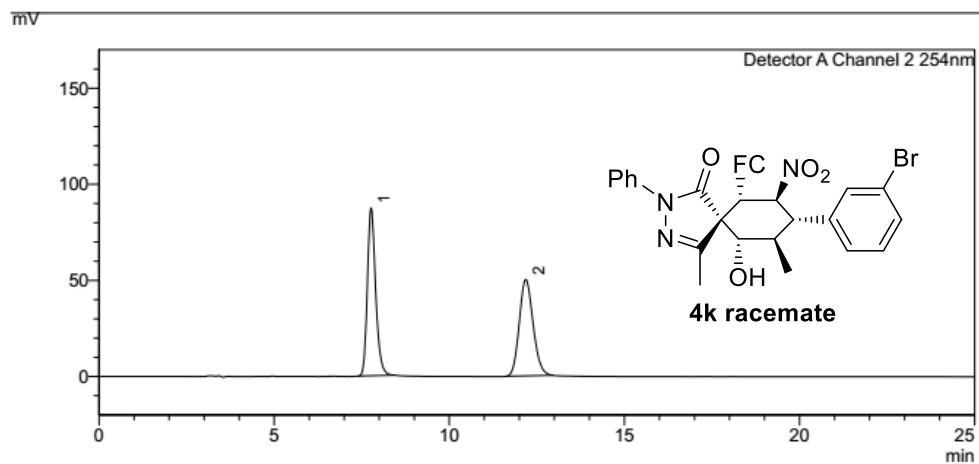

<Peak Table>

Detector A Channel 2 254nm

| Peak# | Ret. Time | Area    | Height | Conc.  | Area%   |
|-------|-----------|---------|--------|--------|---------|
| 1     | 7.769     | 1423222 | 87286  | 50.905 | 50.905  |
| 2     | 12.185    | 1372615 | 50190  | 49.095 | 49.095  |
| Total |           | 2795837 | 137477 |        | 100.000 |

<Chromatogram>

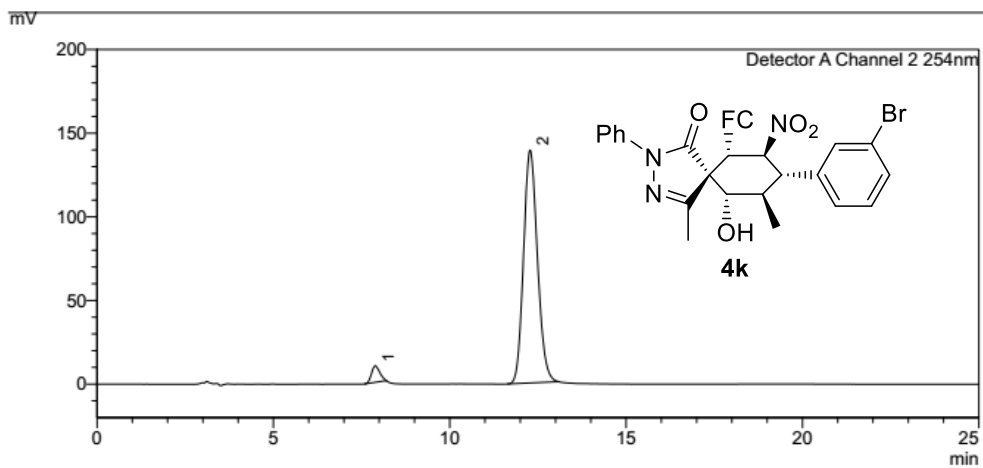

<Peak Table>

Detector A Channel 2 254nm

| Peak# | Ret. Time | Area    | Height | Conc.  | Area%   |
|-------|-----------|---------|--------|--------|---------|
| 1     | 7.891     | 159587  | 9850   | 4.024  | 4.024   |
| 2     | 12.278    | 3806703 | 139222 | 95.976 | 95.976  |
| Total |           | 3966290 | 149072 |        | 100.000 |

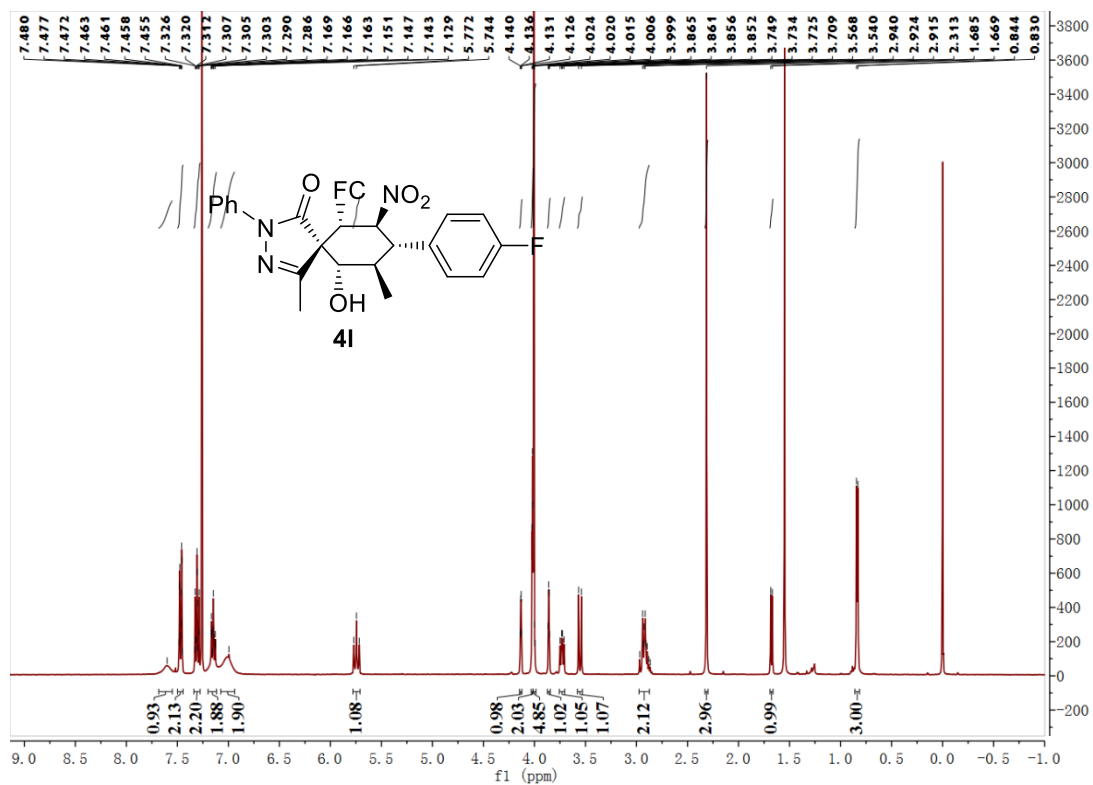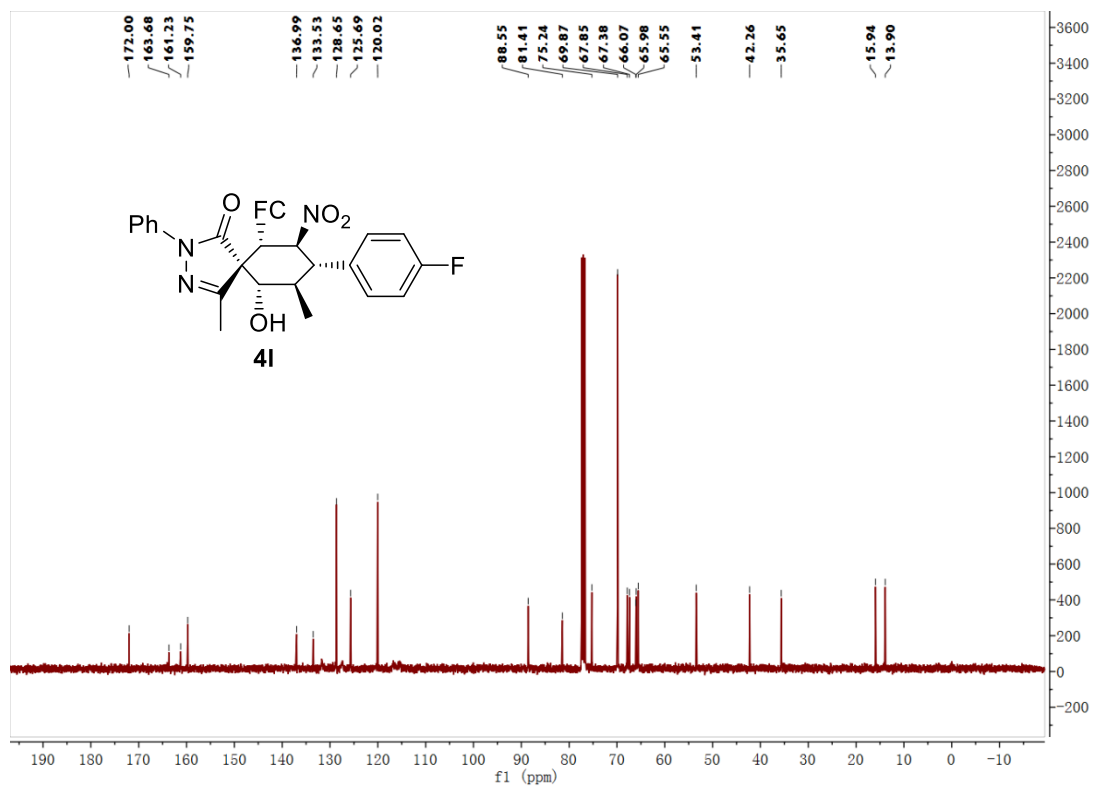

# <Chromatogram>

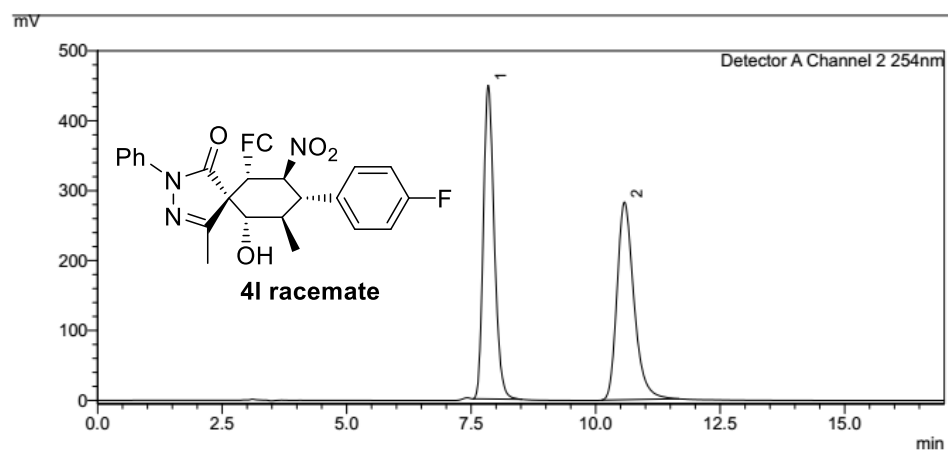

## <Peak Table>

Detector A Channel 2 254nm

| Peak# | Ret. Time | Area     | Height | Conc.  | Area%   |
|-------|-----------|----------|--------|--------|---------|
| 1     | 7.844     | 6824867  | 448607 | 50.546 | 50.546  |
| 2     | 10.580    | 6677426  | 282715 | 49.454 | 49.454  |
| Total |           | 13502294 | 731322 |        | 100.000 |

# <Chromatogram>

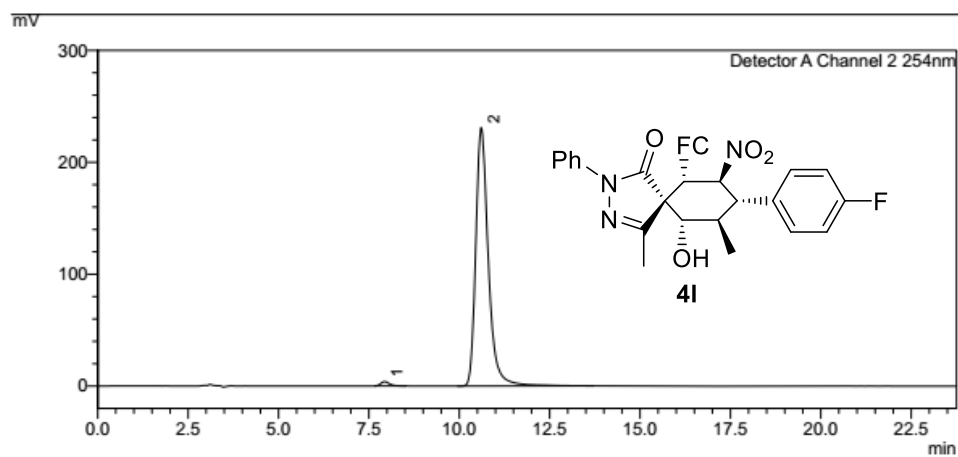

## <Peak Table>

Detector A Channel 2 254nm

| Peak# | Ret. Time | Area    | Height | Conc.  | Area%   |
|-------|-----------|---------|--------|--------|---------|
| 1     | 7.934     | 65317   | 3878   | 1.154  | 1.154   |
| 2     | 10.606    | 5596065 | 231075 | 98.846 | 98.846  |
| Total |           | 5661383 | 234953 |        | 100.000 |

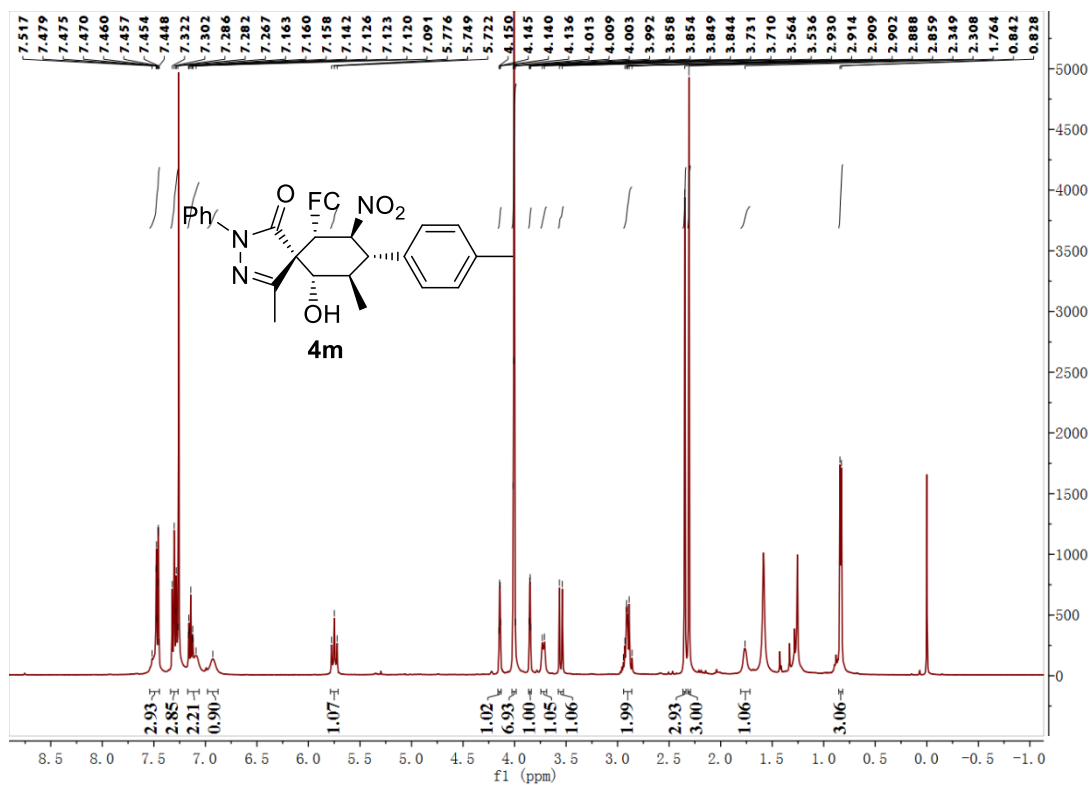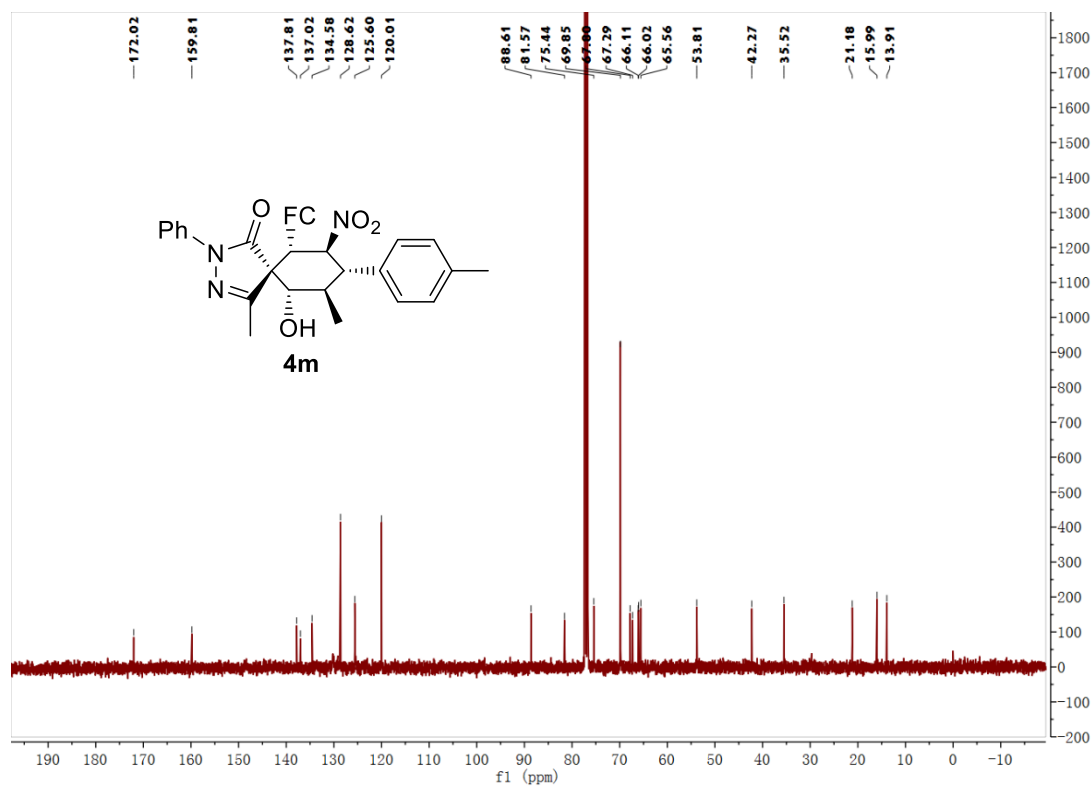

# <Chromatogram>

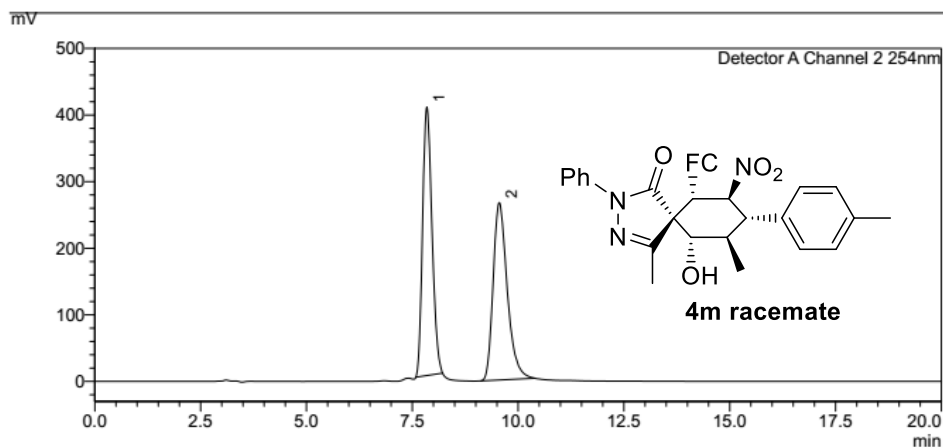

## <Peak Table>

Detector A Channel 2 254nm

| Peak# | Ret. Time | Area     | Height | Conc.  | Area%   |
|-------|-----------|----------|--------|--------|---------|
| 1     | 7.844     | 6204052  | 403026 | 50.140 | 50.140  |
| 2     | 9.554     | 6169322  | 266391 | 49.860 | 49.860  |
| Total |           | 12373375 | 669417 |        | 100.000 |

# <Chromatogram>

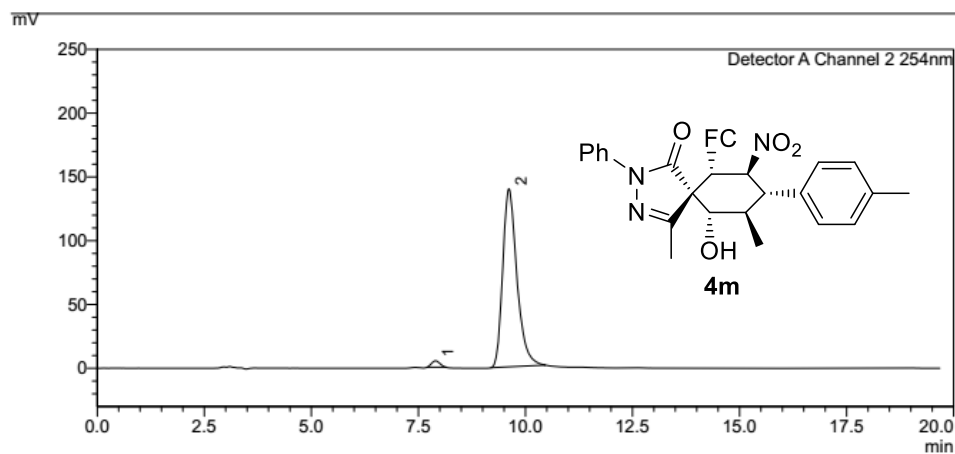

## <Peak Table>

Detector A Channel 2 254nm

| Peak# | Ret. Time | Area    | Height | Conc.  | Area%   |
|-------|-----------|---------|--------|--------|---------|
| 1     | 7.899     | 67049   | 4989   | 2.042  | 2.042   |
| 2     | 9.613     | 3217253 | 139587 | 97.958 | 97.958  |
| Total |           | 3284303 | 144577 |        | 100.000 |



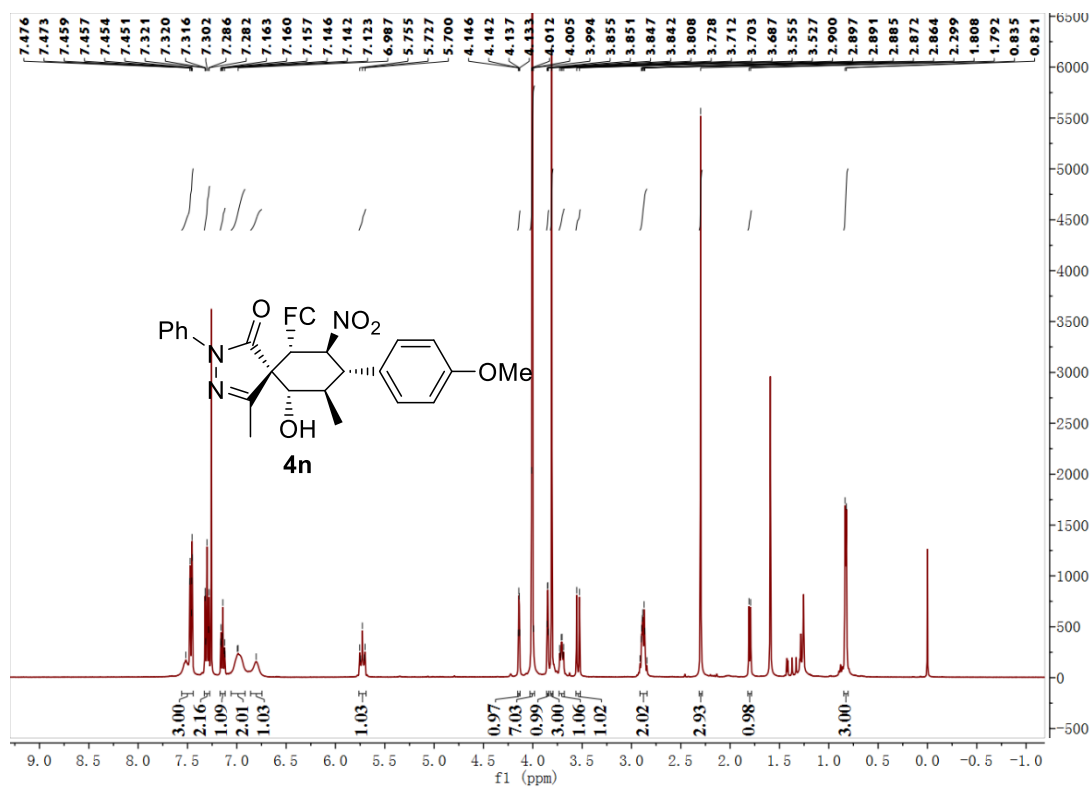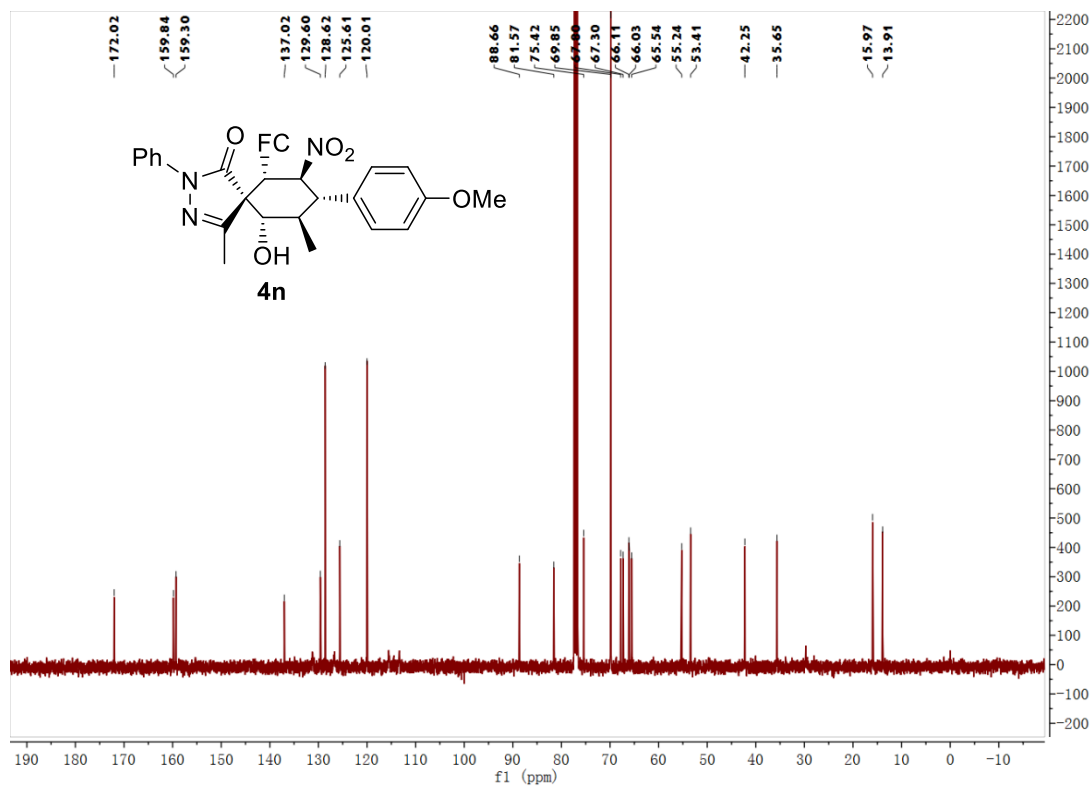

<Chromatogram>

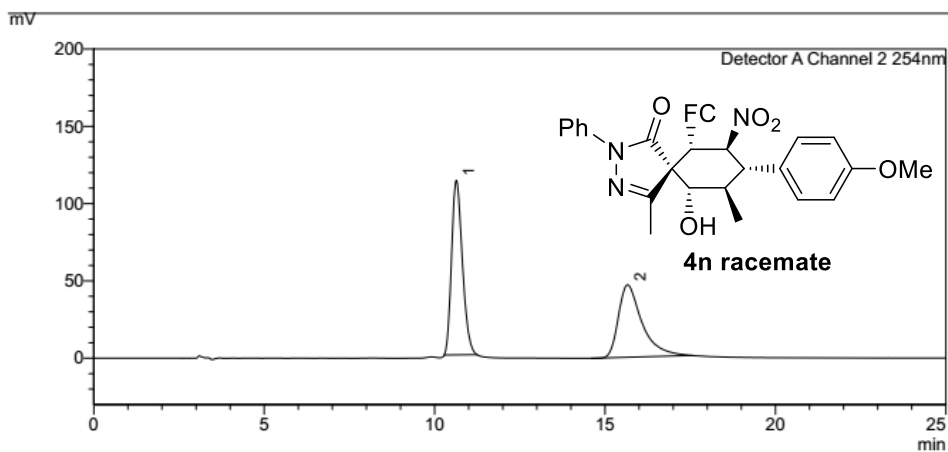

<Peak Table>

| Detector A Channel 2 254nm |           |         |        |        |         |
|----------------------------|-----------|---------|--------|--------|---------|
| Peak#                      | Ret. Time | Area    | Height | Conc.  | Area%   |
| 1                          | 10.636    | 2490418 | 112976 | 52.474 | 52.474  |
| 2                          | 15.661    | 2255545 | 46833  | 47.526 | 47.526  |
| Total                      |           | 4745963 | 159808 |        | 100.000 |

<Chromatogram>

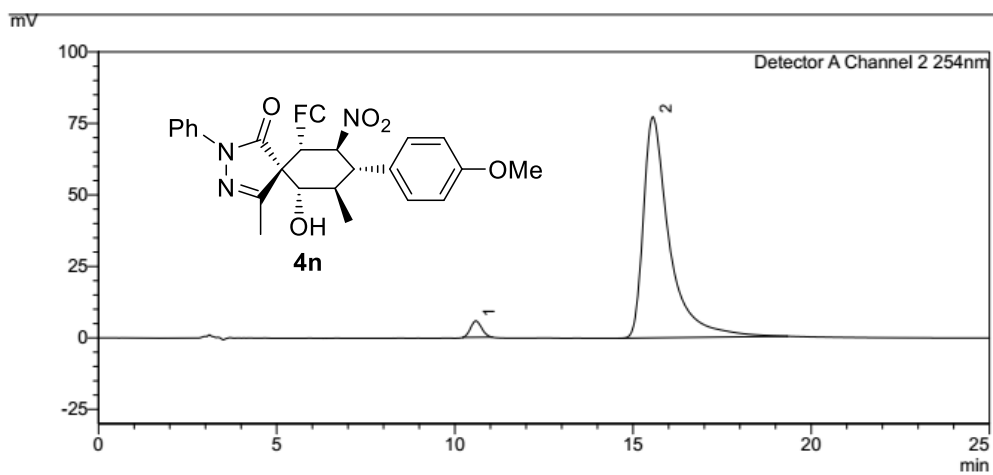

<Peak Table>

| Detector A Channel 2 254nm |           |         |        |        |         |
|----------------------------|-----------|---------|--------|--------|---------|
| Peak#                      | Ret. Time | Area    | Height | Conc.  | Area%   |
| 1                          | 10.590    | 123944  | 5716   | 3.065  | 3.065   |
| 2                          | 15.557    | 3919735 | 77290  | 96.935 | 96.935  |
| Total                      |           | 4043680 | 83006  |        | 100.000 |

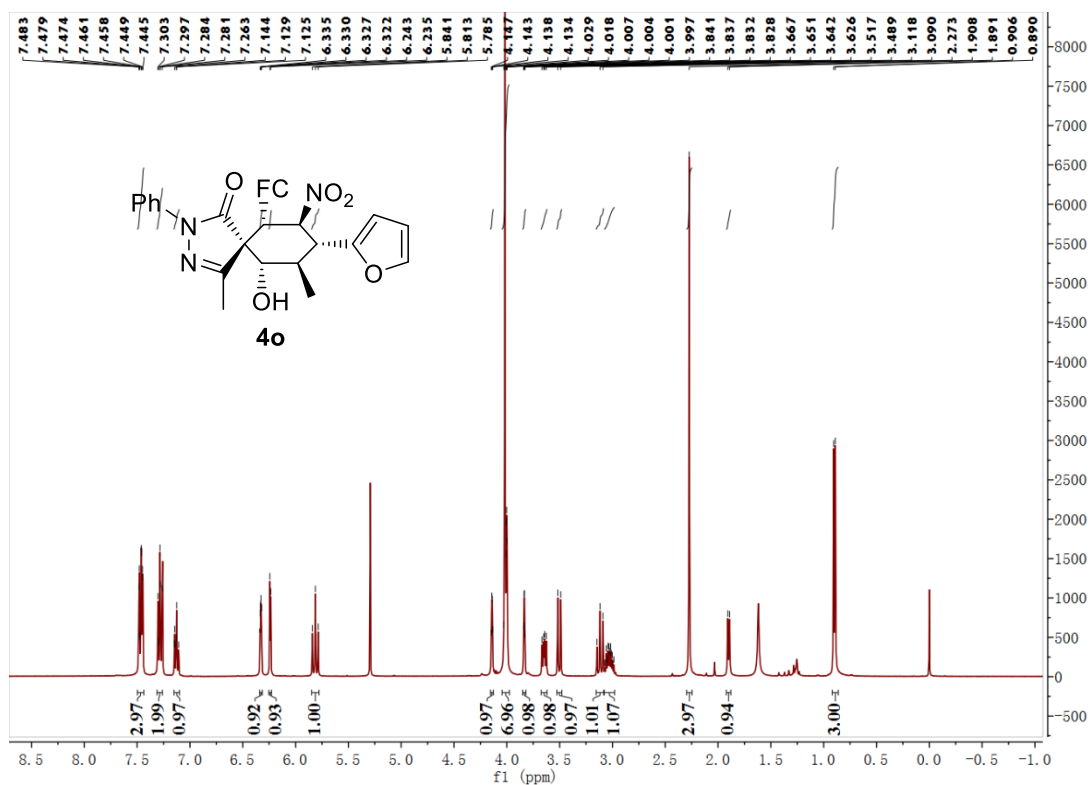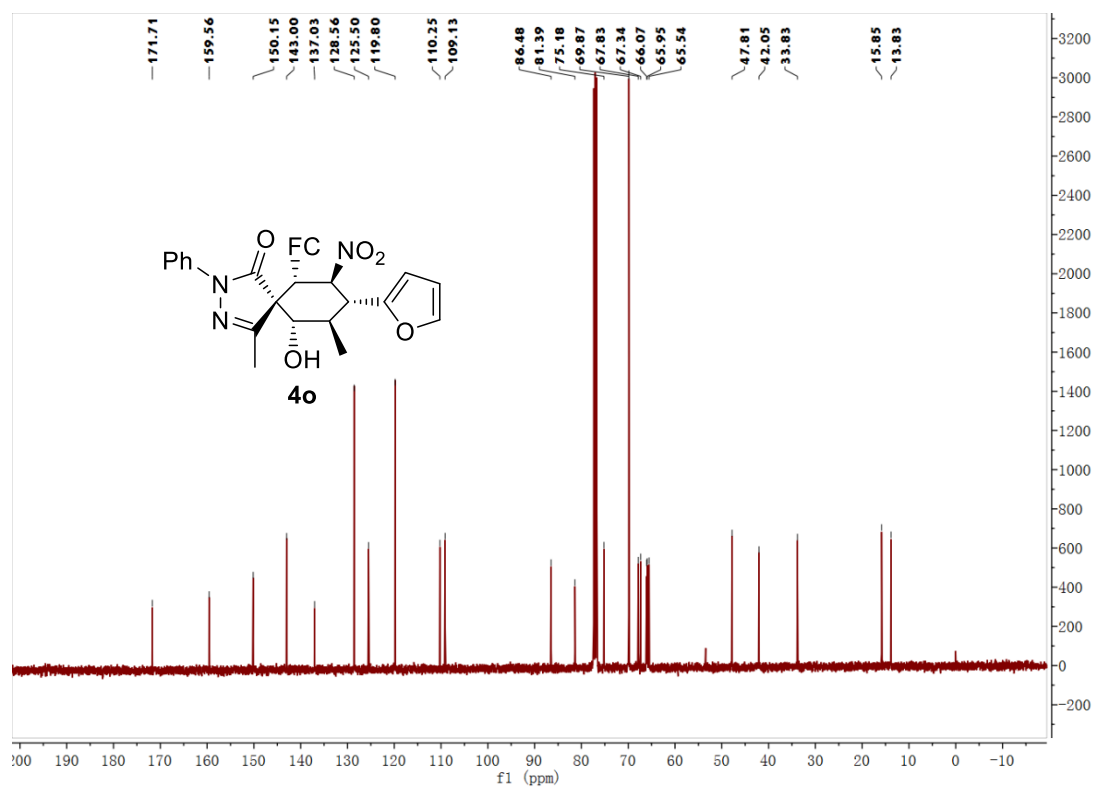

<Chromatogram>

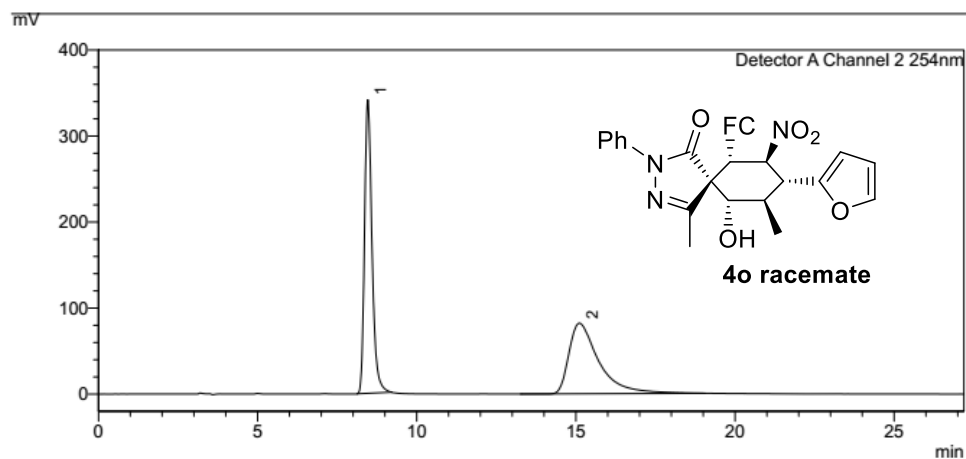

<Peak Table>

Detector A Channel 2 254nm

| Peak# | Ret. Time | Area     | Height | Conc.  | Area%   |
|-------|-----------|----------|--------|--------|---------|
| 1     | 8.462     | 5568008  | 341318 | 50.965 | 50.965  |
| 2     | 15.113    | 5357178  | 82057  | 49.035 | 49.035  |
| Total |           | 10925186 | 423375 |        | 100.000 |

<Chromatogram>

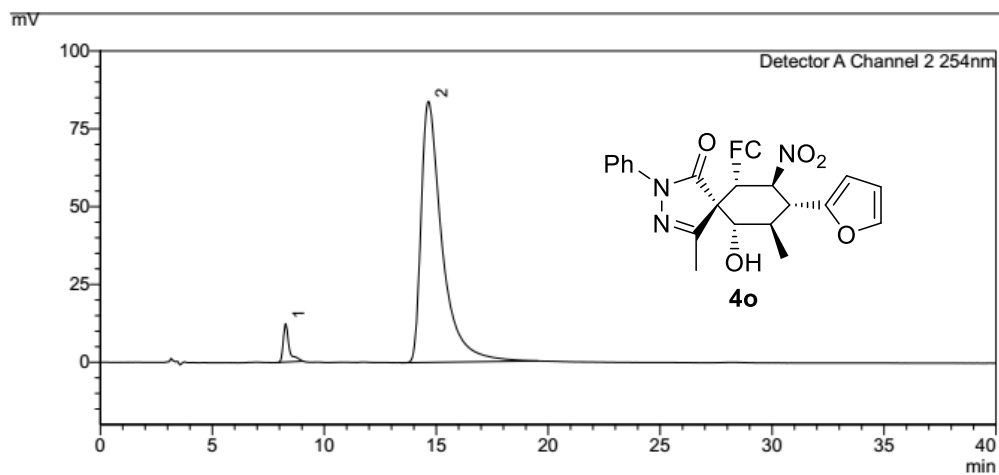

<Peak Table>

Detector A Channel 2 254nm

| Peak# | Ret. Time | Area    | Height | Conc.  | Area%   |
|-------|-----------|---------|--------|--------|---------|
| 1     | 8.275     | 226216  | 12341  | 3.984  | 3.984   |
| 2     | 14.653    | 5451548 | 83870  | 96.016 | 96.016  |
| Total |           | 5677763 | 96211  |        | 100.000 |

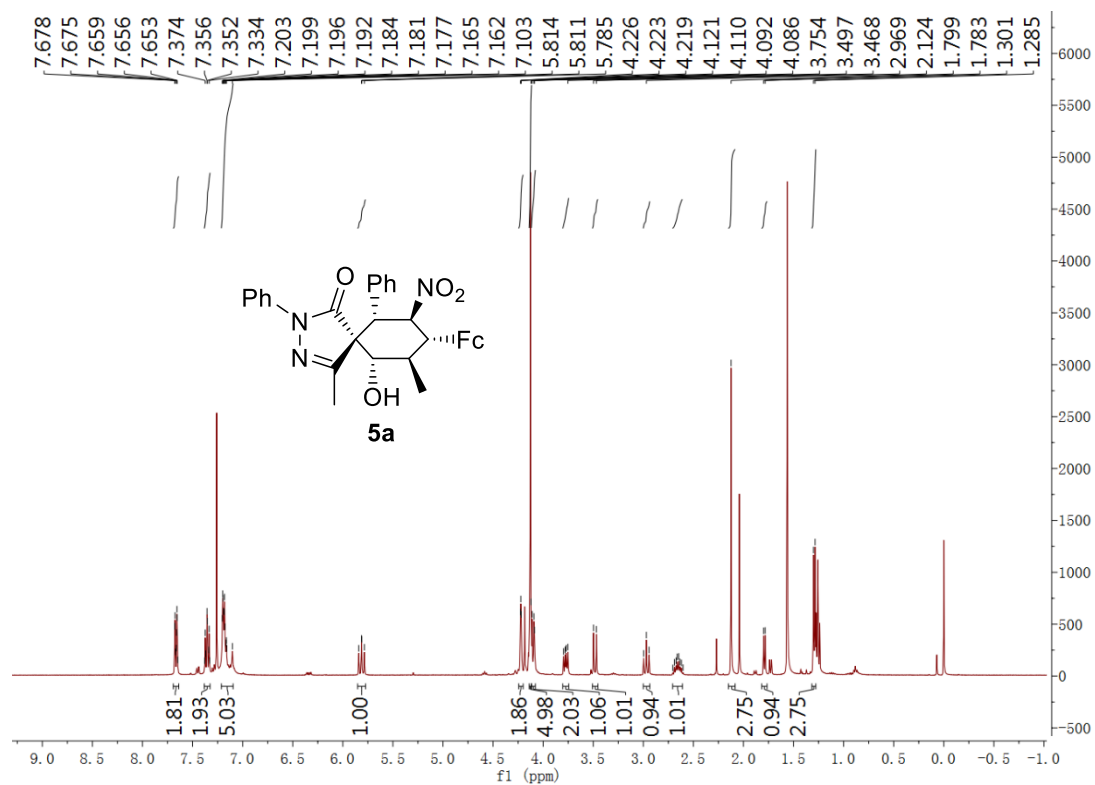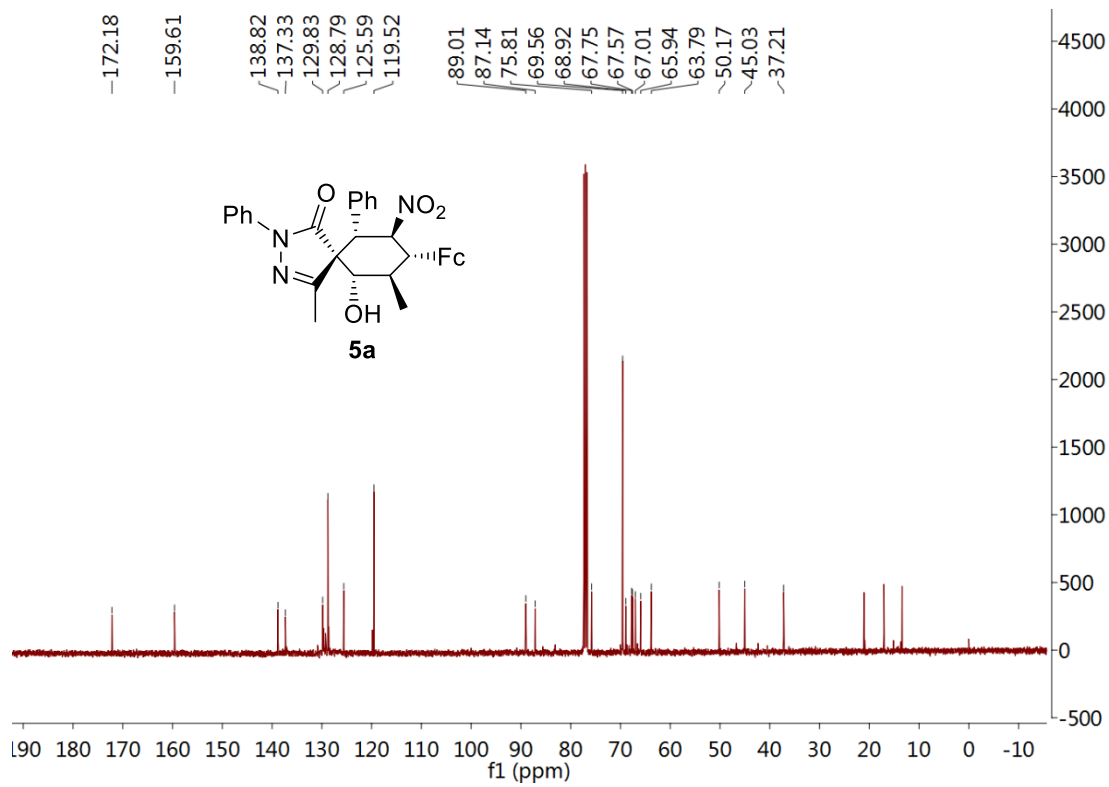

### <Chromatogram>

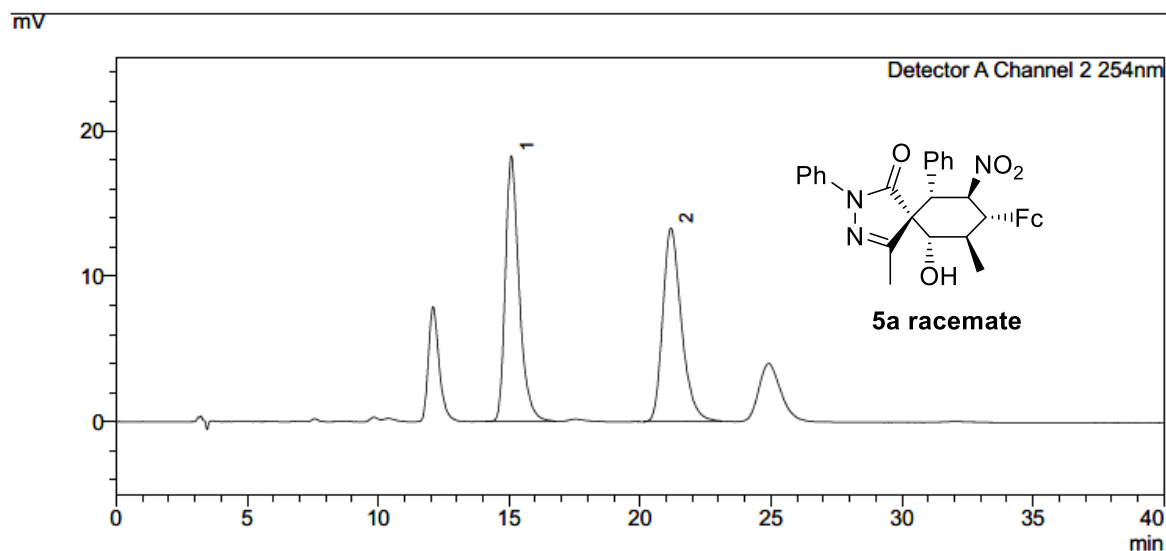

### <Peak Table>

Detector A Channel 2 254nm

| Peak# | Ret. Time | Area    | Height | Conc.  | Area%   |
|-------|-----------|---------|--------|--------|---------|
| 1     | 15.079    | 663408  | 18247  | 50.285 | 50.285  |
| 2     | 21.176    | 655901  | 13288  | 49.715 | 49.715  |
| Total |           | 1319308 | 31536  |        | 100.000 |

### <Chromatogram>

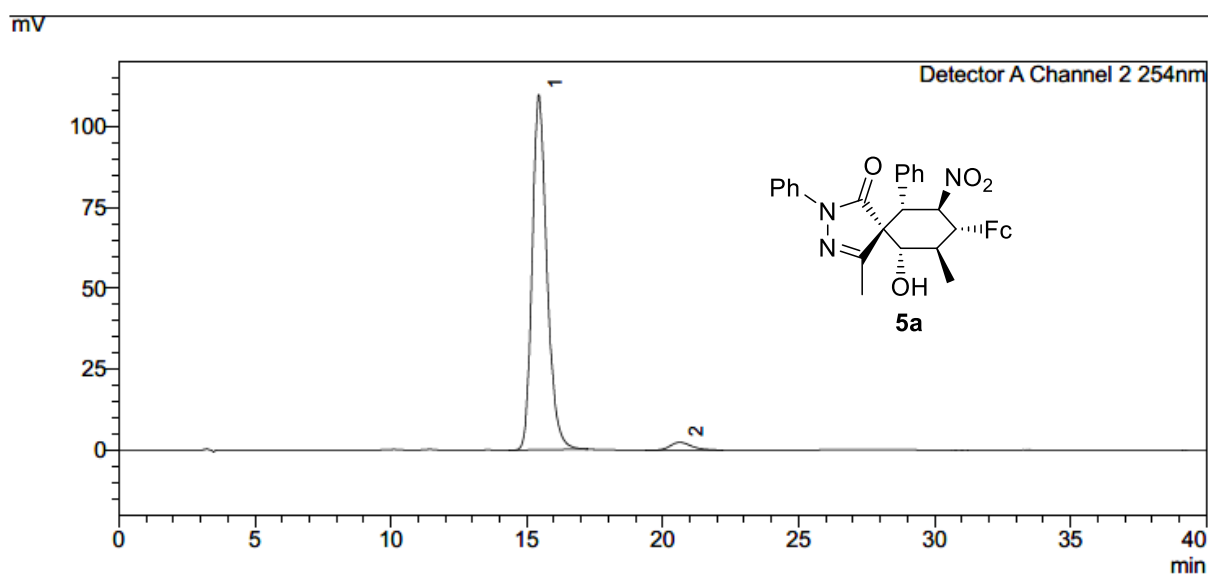

### <Peak Table>

Detector A Channel 2 254nm

| Peak# | Ret. Time | Area    | Height | Conc.  | Area%   |
|-------|-----------|---------|--------|--------|---------|
| 1     | 15.439    | 4130184 | 109762 | 97.002 | 97.002  |
| 2     | 20.620    | 127668  | 2390   | 2.998  | 2.998   |
| Total |           | 4257852 | 112152 |        | 100.000 |

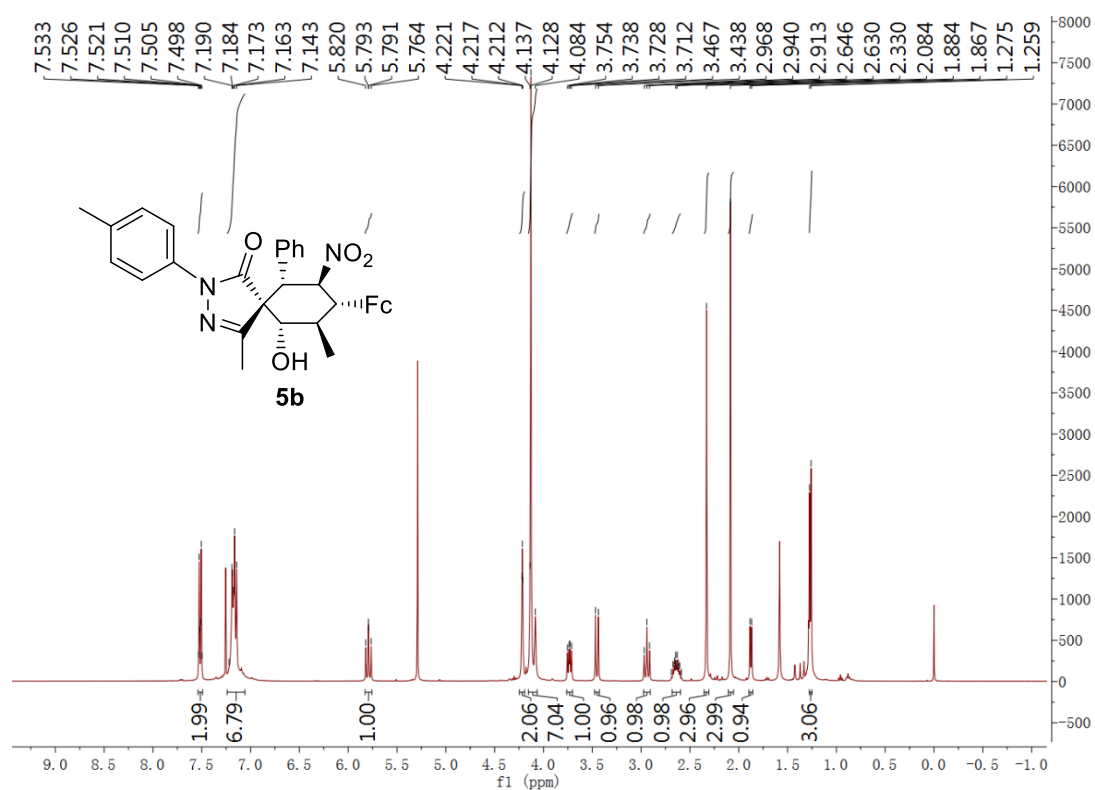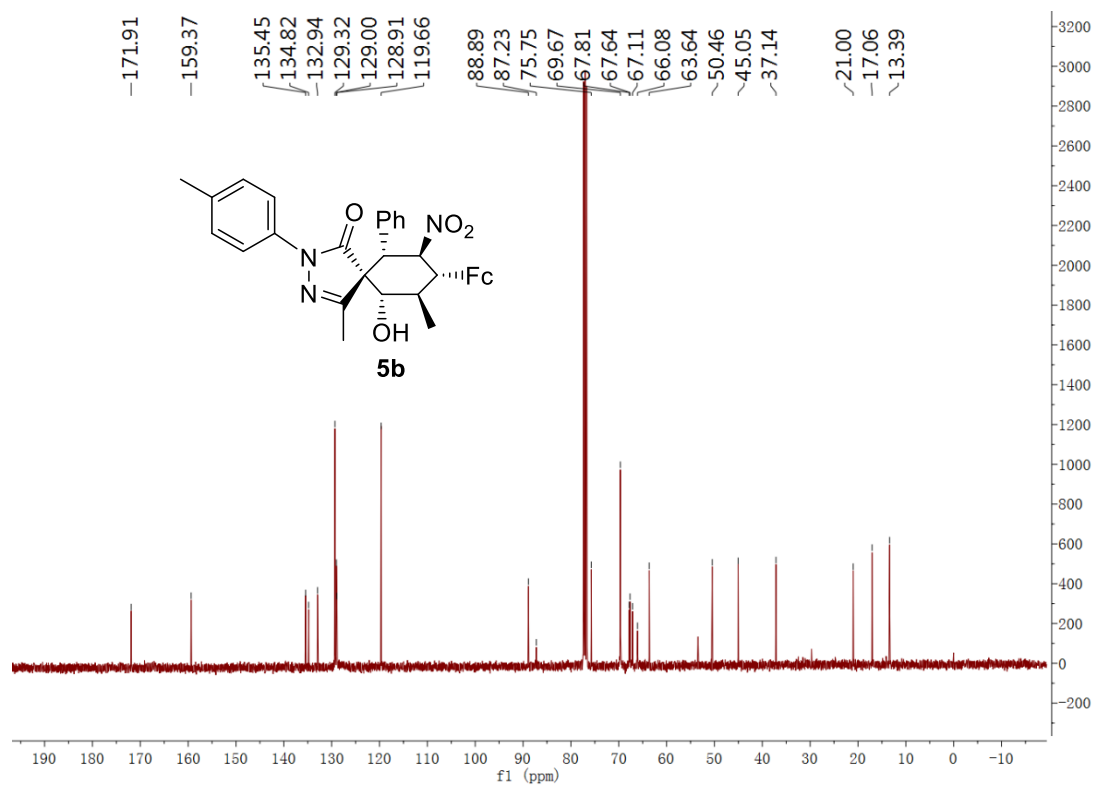

## Peak Analysis Report

Detector A Channel 2 254nm

| No.   | Ret. Time | Height (mAu) | Area (mAu*min) | Rel. Area (%) |
|-------|-----------|--------------|----------------|---------------|
| 1     | 14.545    | 174881       | 5181606        | 50.999        |
| 2     | 28.669    | 85194        | 4978536        | 49.001        |
| Total |           | 260076       | 10160143       | 100.000       |

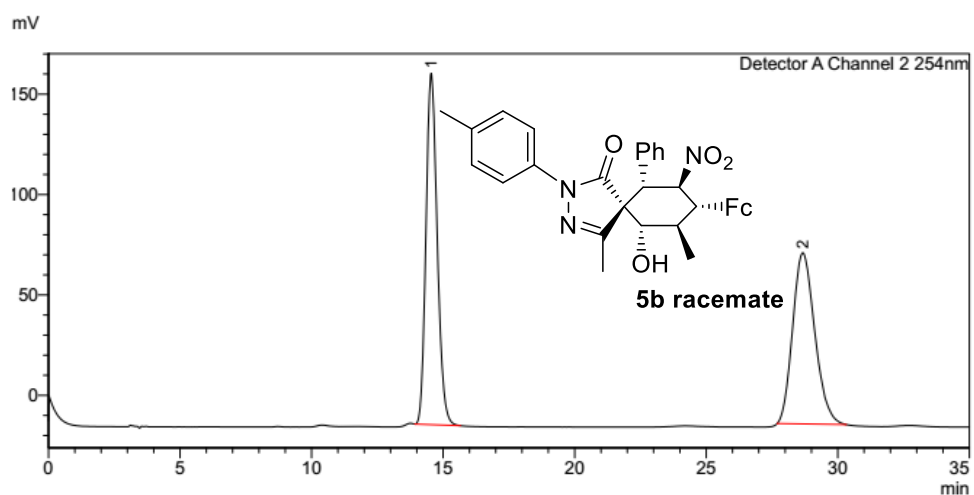

## Peak Analysis Report

Detector A Channel 2 254nm

| No.   | Ret. Time | Height (mAu) | Area (mAu*min) | Rel. Area (%) |
|-------|-----------|--------------|----------------|---------------|
| 1     | 14.522    | 1354         | 38693          | 0.171         |
| 2     | 28.583    | 378138       | 22540514       | 99.829        |
| Total |           | 379492       | 22579207       | 100.000       |

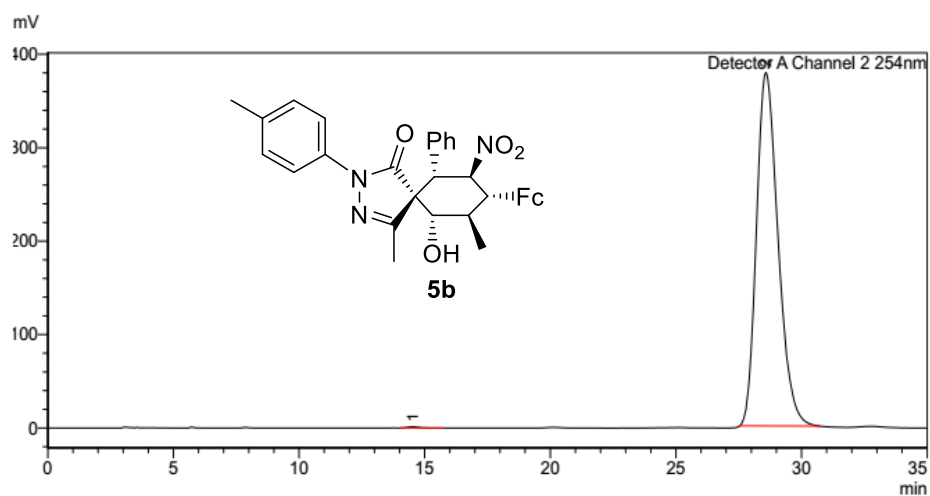



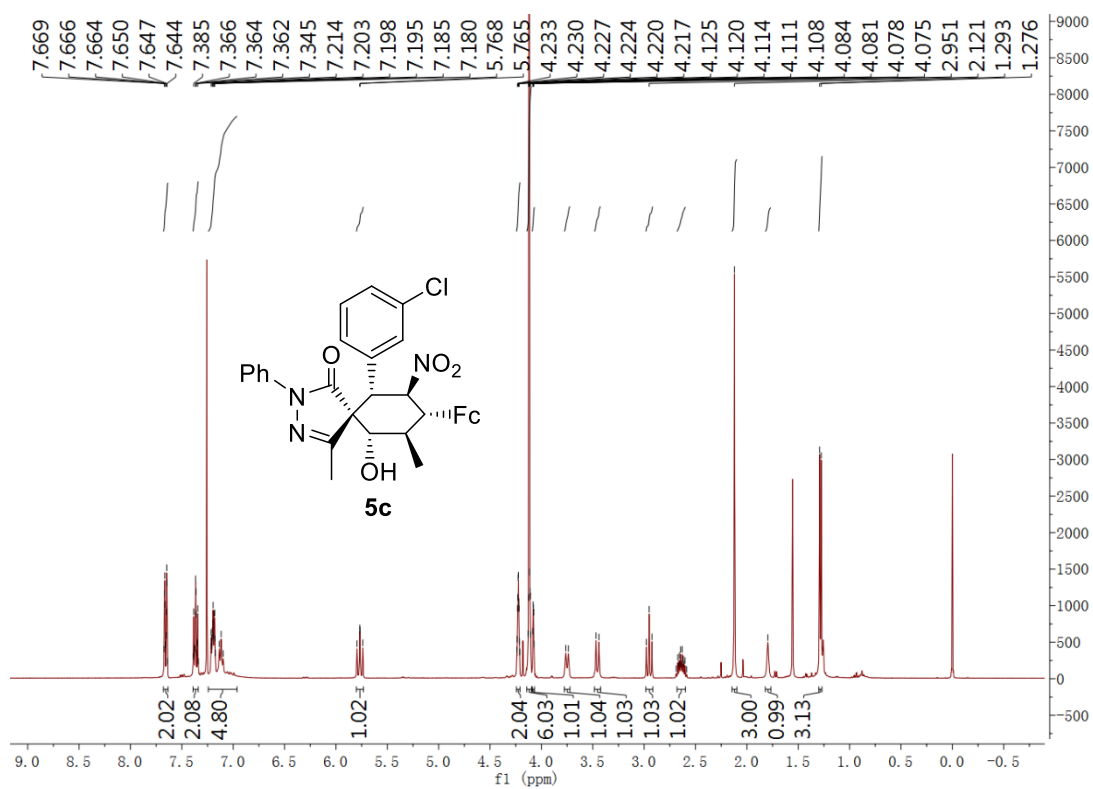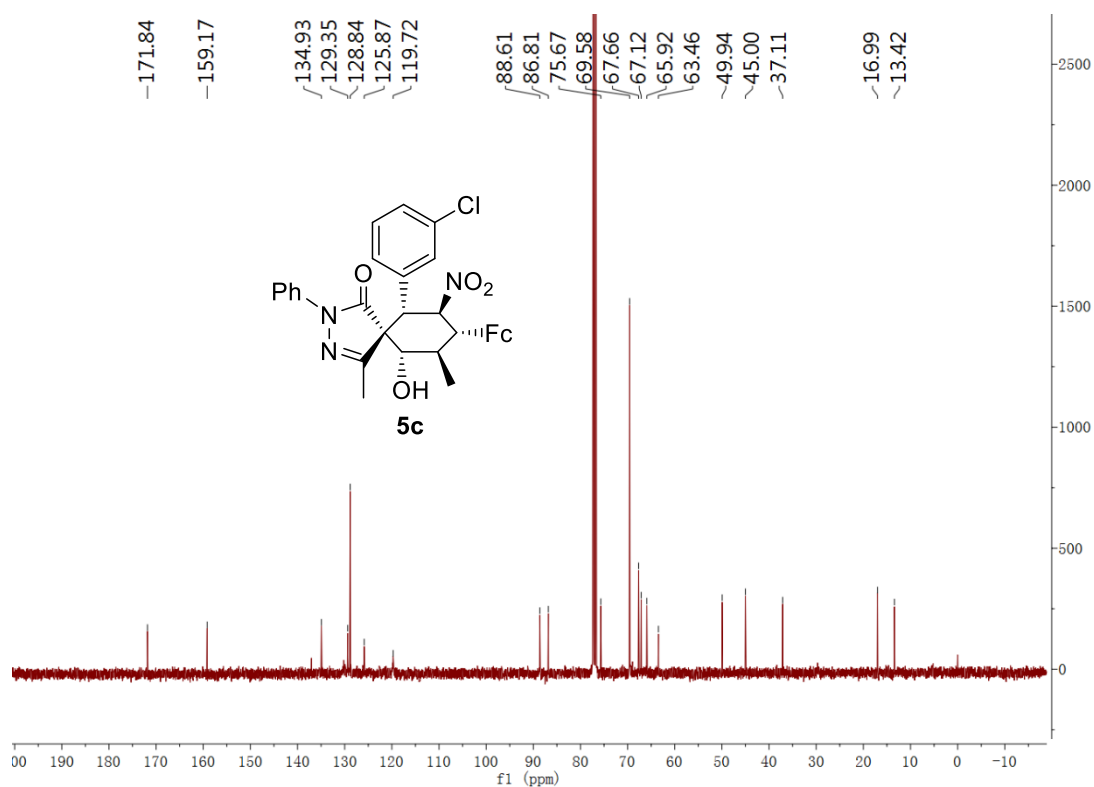

Detector A Channel 2 254nm

| No.   | Ret. Time | Height (mAu) | Area (mAu*min) | Rel. Area (%) |
|-------|-----------|--------------|----------------|---------------|
| 1     | 17.075    | 66028        | 2533715        | 51.573        |
| 2     | 24.588    | 48313        | 2379142        | 48.427        |
| Total |           | 114341       | 4912857        | 100.000       |

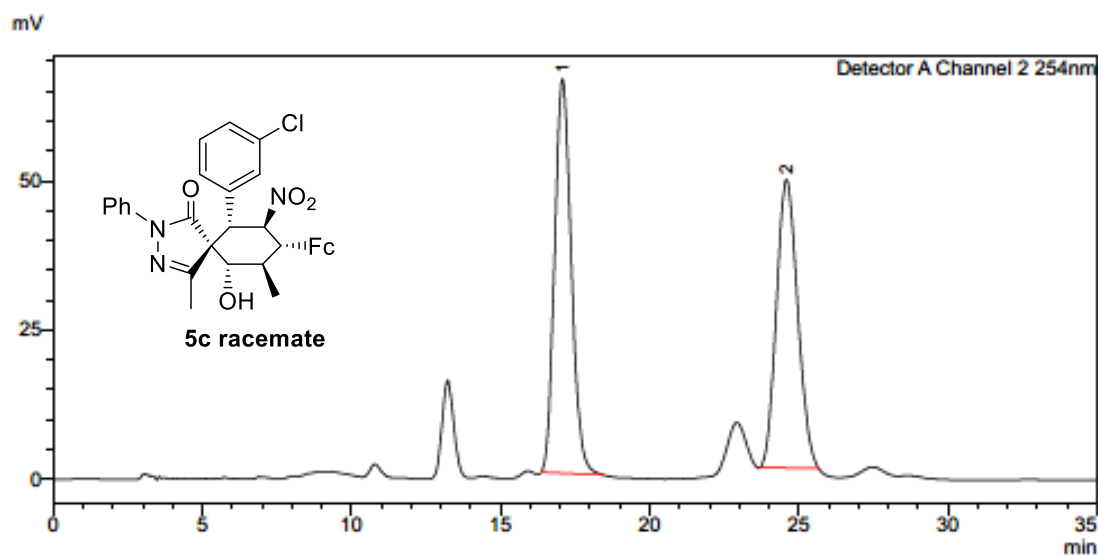

Detector A Channel 2 254nm

| No.   | Ret. Time | Height (mAu) | Area (mAu*min) | Rel. Area (%) |
|-------|-----------|--------------|----------------|---------------|
| 1     | 17.111    | 1529         | 48693          | 0.352         |
| 2     | 24.521    | 271038       | 13788775       | 99.648        |
| Total |           | 272567       | 13837469       | 100.000       |

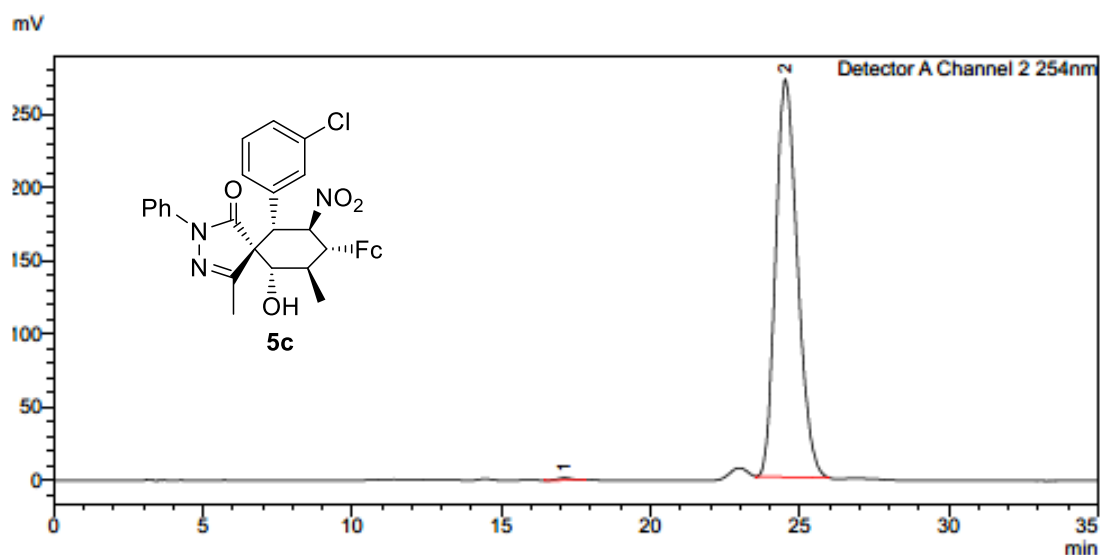

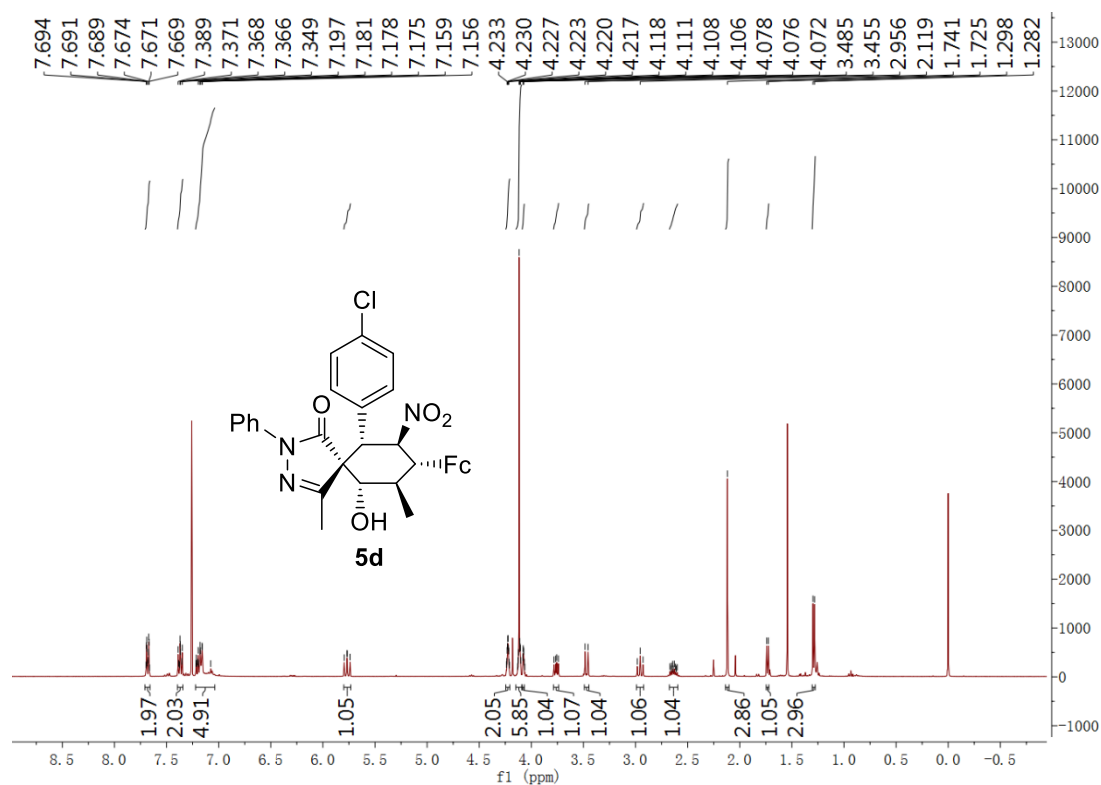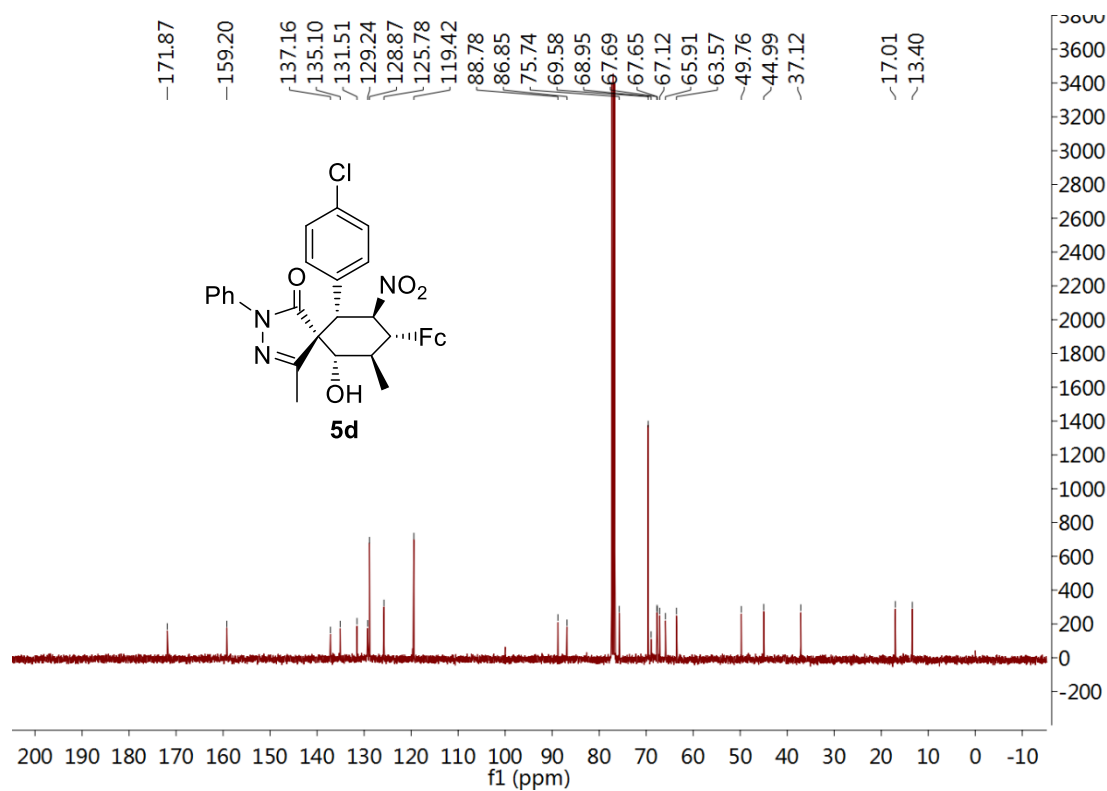

Detector A Channel 2 254nm

| No.   | Ret. Time | Height (mAu) | Area (mAu*min) | Rel. Area (%) |
|-------|-----------|--------------|----------------|---------------|
| 1     | 10.848    | 228649       | 5759421        | 49.503        |
| 2     | 15.678    | 187857       | 5875182        | 50.497        |
| Total |           | 416507       | 11634603       | 100.000       |

mV

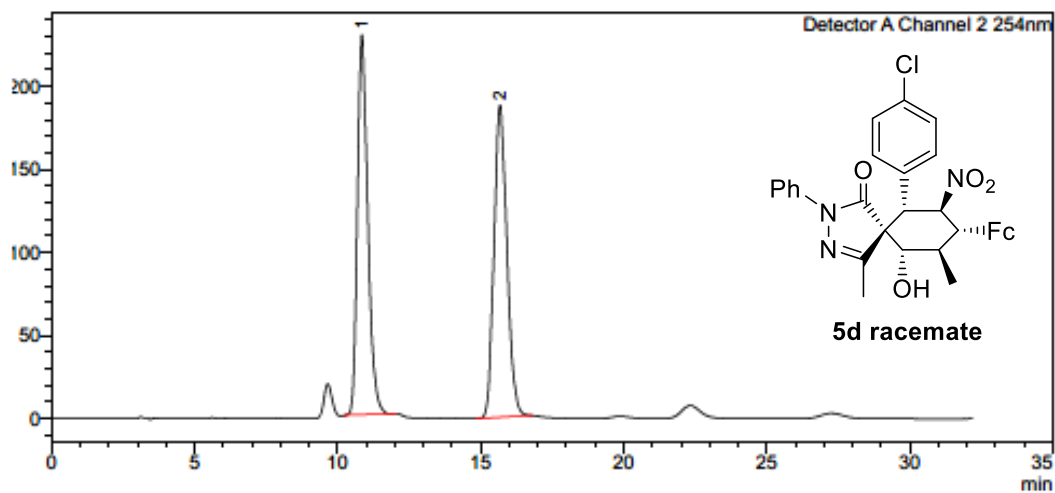

Detector A Channel 2 254nm

| No.   | Ret. Time | Height (mAu) | Area (mAu*min) | Rel. Area (%) |
|-------|-----------|--------------|----------------|---------------|
| 1     | 10.955    | 4184         | 97596          | 0.755         |
| 2     | 15.751    | 411768       | 12826520       | 99.245        |
| Total |           | 415952       | 12924116       | 100.000       |

mV

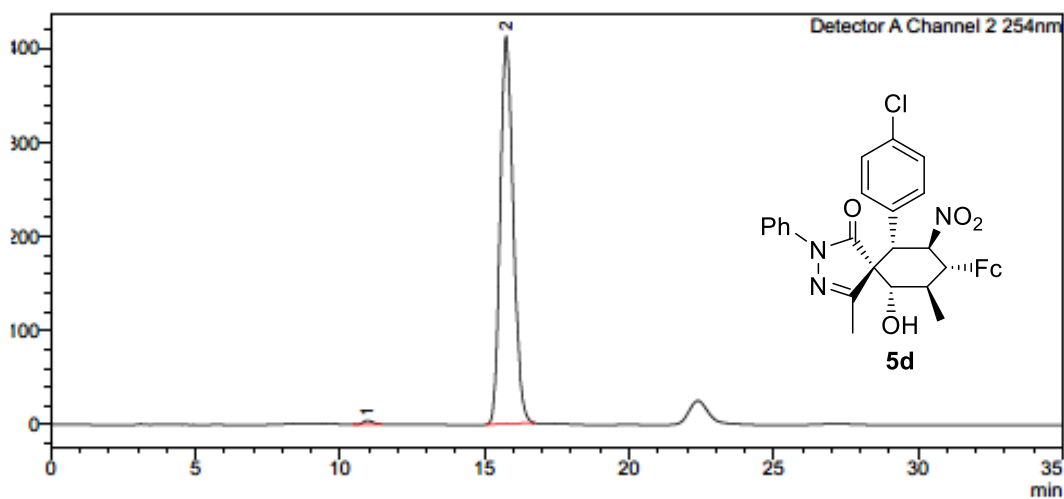

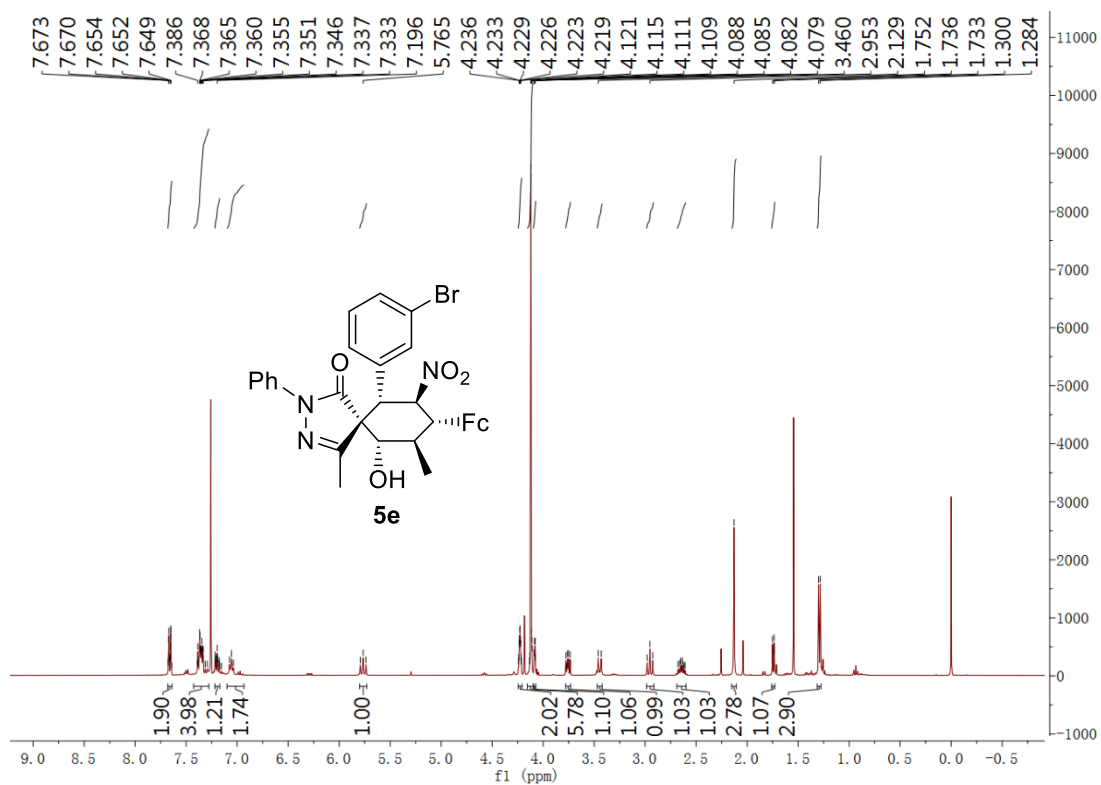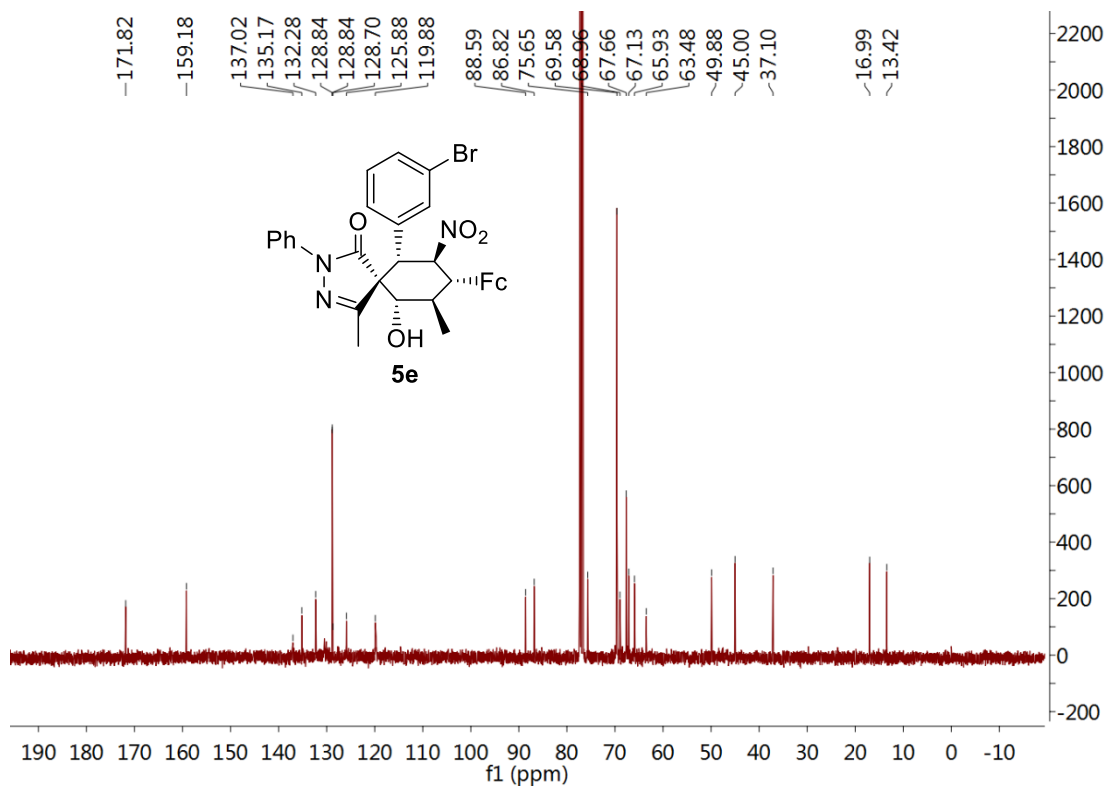

Detector A Channel 2 254nm

| No.   | Ret. Time | Height (mAu) | Area (mAu*min) | Rel. Area (%) |
|-------|-----------|--------------|----------------|---------------|
| 1     | 18.209    | 56402        | 2381819        | 47.562        |
| 2     | 26.928    | 43964        | 2625972        | 52.438        |
| Total |           | 100366       | 5007791        | 100.000       |

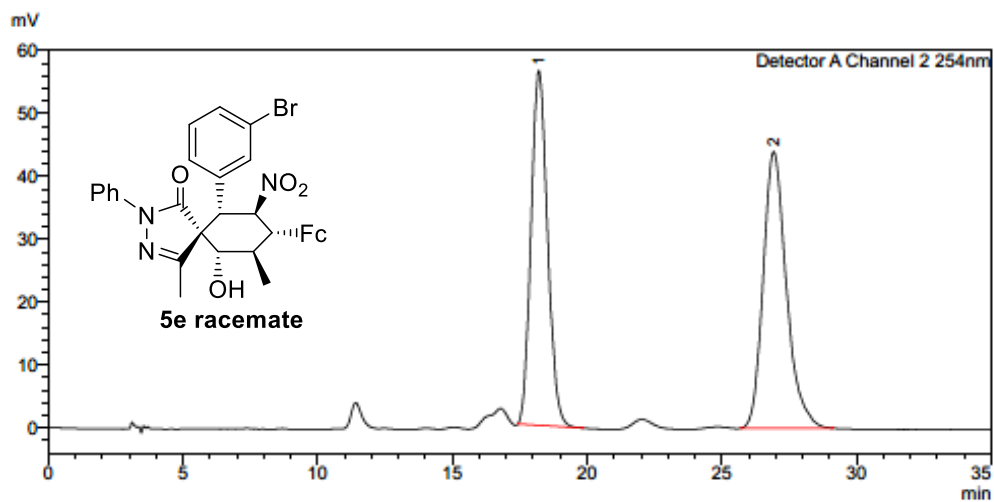

Detector A Channel 2 254nm

| No.   | Ret. Time | Height (mAu) | Area (mAu*min) | Rel. Area (%) |
|-------|-----------|--------------|----------------|---------------|
| 1     | 18.155    | 4100         | 138508         | 0.590         |
| 2     | 26.450    | 412732       | 23318272       | 99.410        |
| Total |           | 416833       | 23456780       | 100.000       |

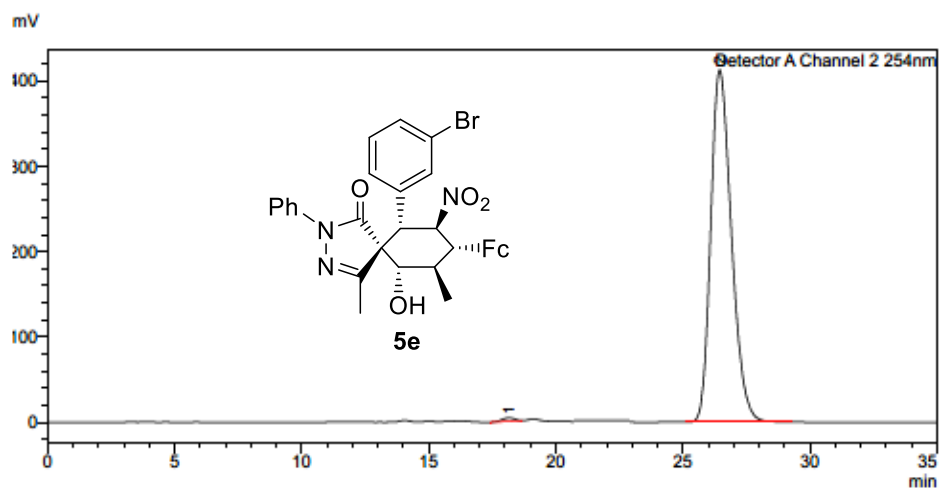

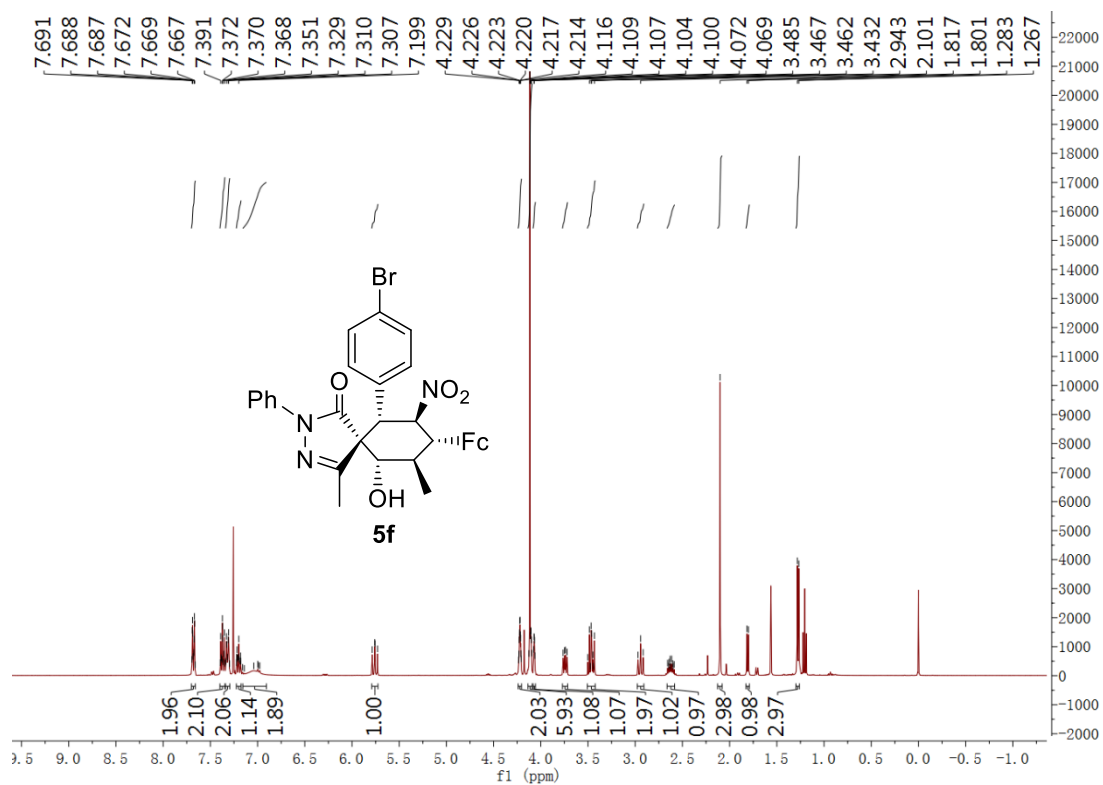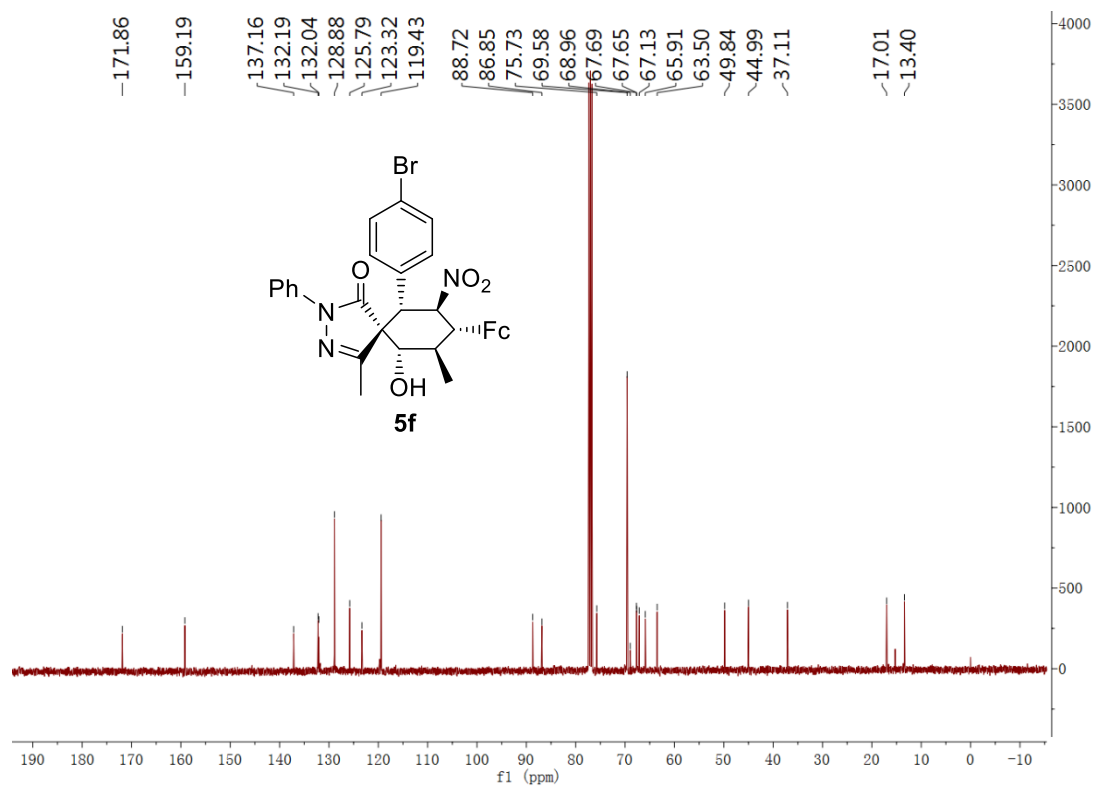

Detector A Channel 2 254nm

| No.   | Ret. Time | Height (mAu) | Area (mAu*min) | Rel. Area (%) |
|-------|-----------|--------------|----------------|---------------|
| 1     | 11.579    | 161089       | 4168699        | 48.896        |
| 2     | 16.710    | 126259       | 4356951        | 51.104        |
| Total |           | 287349       | 8525650        | 100.000       |

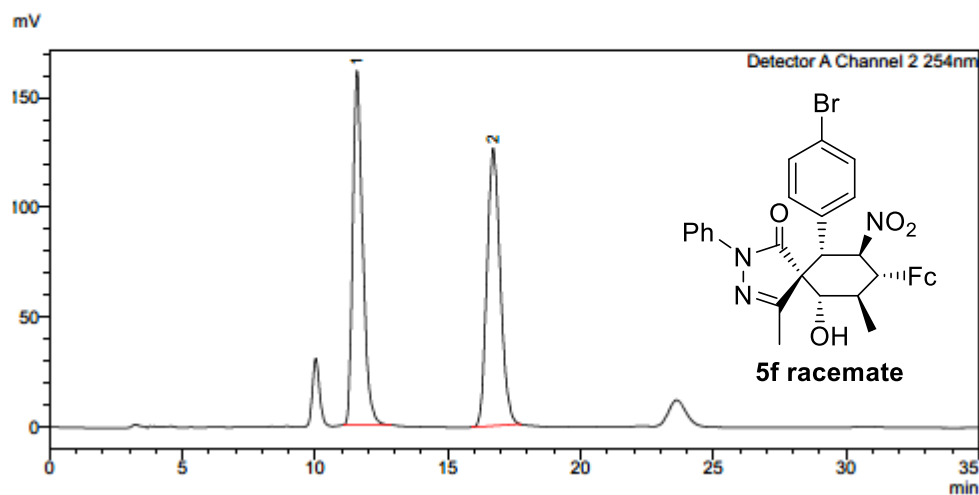

Detector A Channel 2 254nm

| No.   | Ret. Time | Height (mAu) | Area (mAu*min) | Rel. Area (%) |
|-------|-----------|--------------|----------------|---------------|
| 1     | 11.557    | 8350         | 162267         | 0.942         |
| 2     | 16.515    | 521059       | 17068853       | 99.058        |
| Total |           | 529408       | 17231120       | 100.000       |

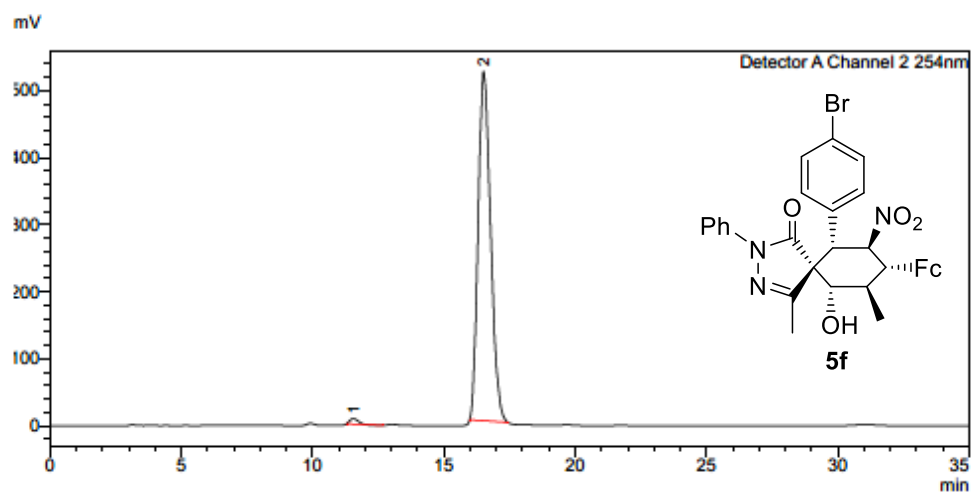



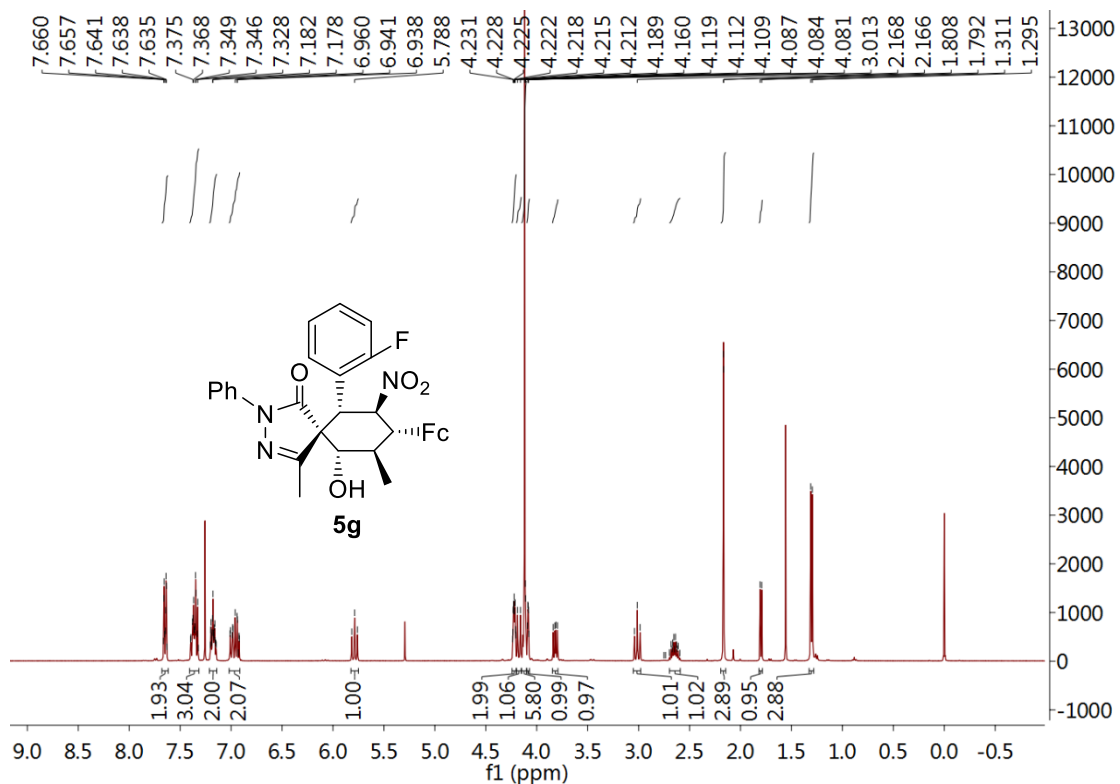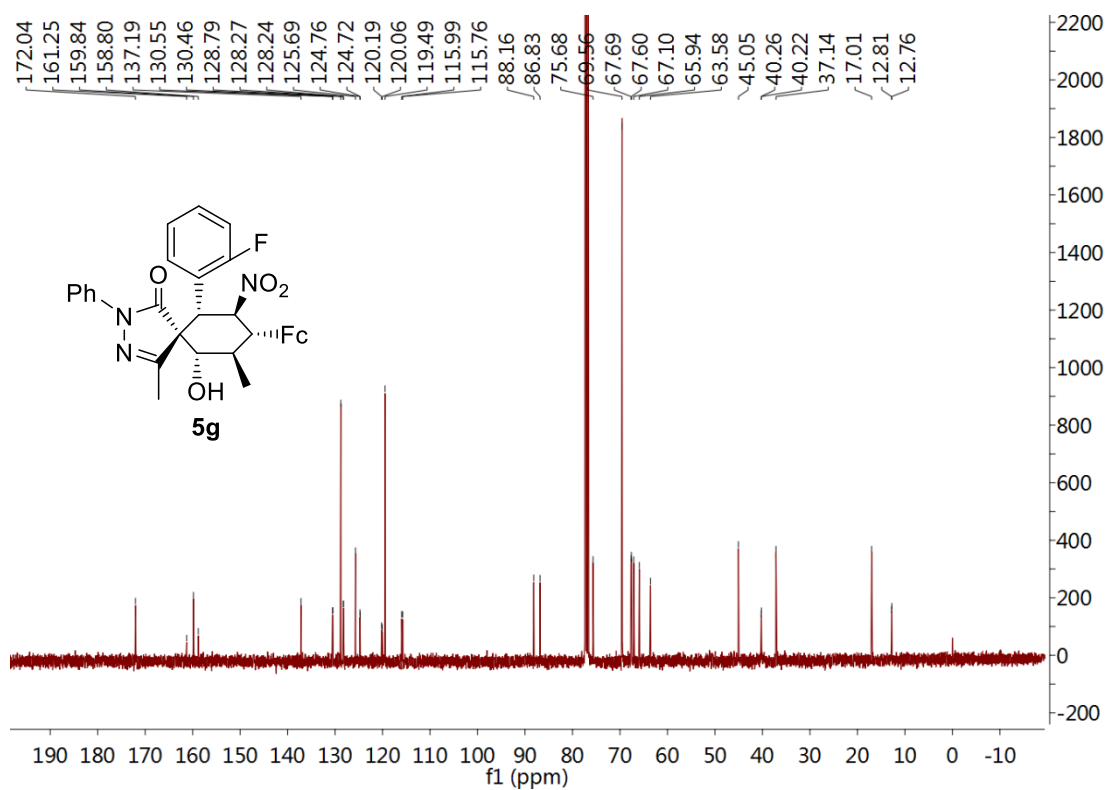

<Chromatogram>

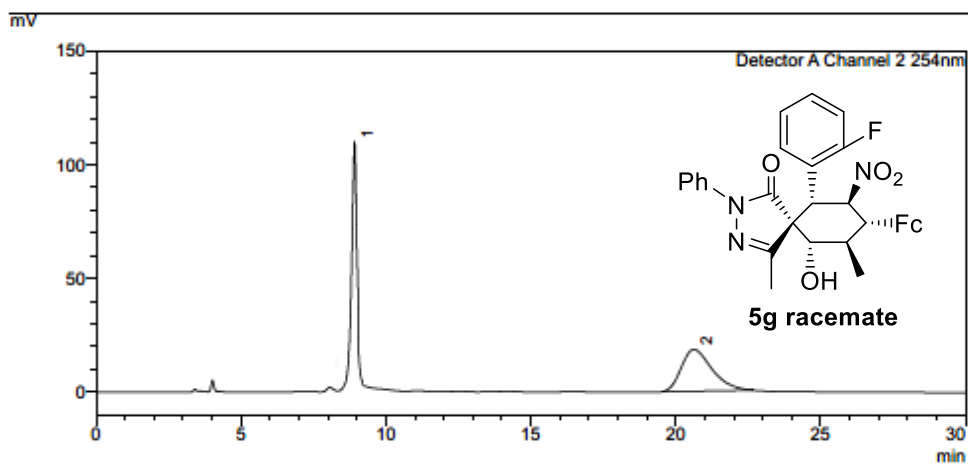

<Peak Table>

Detector A Channel 2 254nm

| Peak# | Ret. Time | Area    | Height | Conc.  | Area%   |
|-------|-----------|---------|--------|--------|---------|
| 1     | 8.920     | 1185509 | 97975  | 46.802 | 46.802  |
| 2     | 20.629    | 1347506 | 18361  | 53.198 | 53.198  |
| Total |           | 2533015 | 116336 |        | 100.000 |

<Chromatogram>

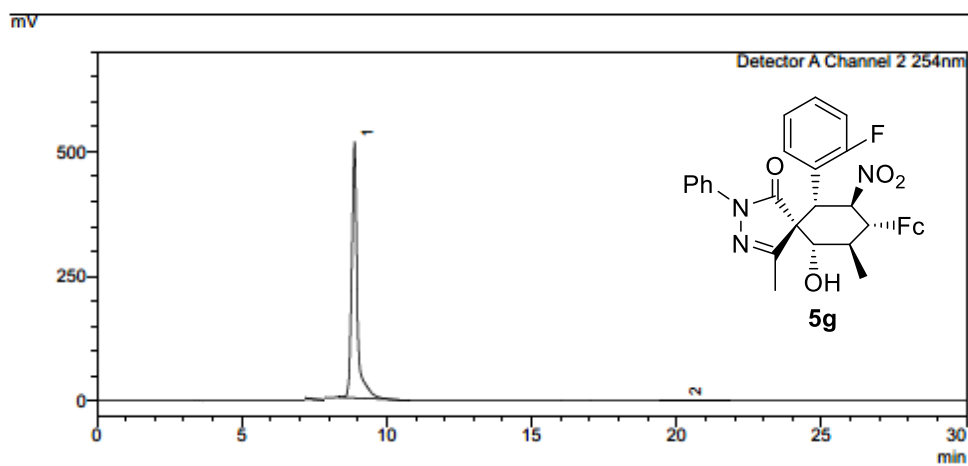

<Peak Table>

Detector A Channel 2 254nm

| Peak# | Ret. Time | Area    | Height | Conc.  | Area%   |
|-------|-----------|---------|--------|--------|---------|
| 1     | 8.890     | 6813290 | 514017 | 99.936 | 99.936  |
| 2     | 20.221    | 4342    | 55     | 0.064  | 0.064   |
| Total |           | 6817631 | 514072 |        | 100.000 |

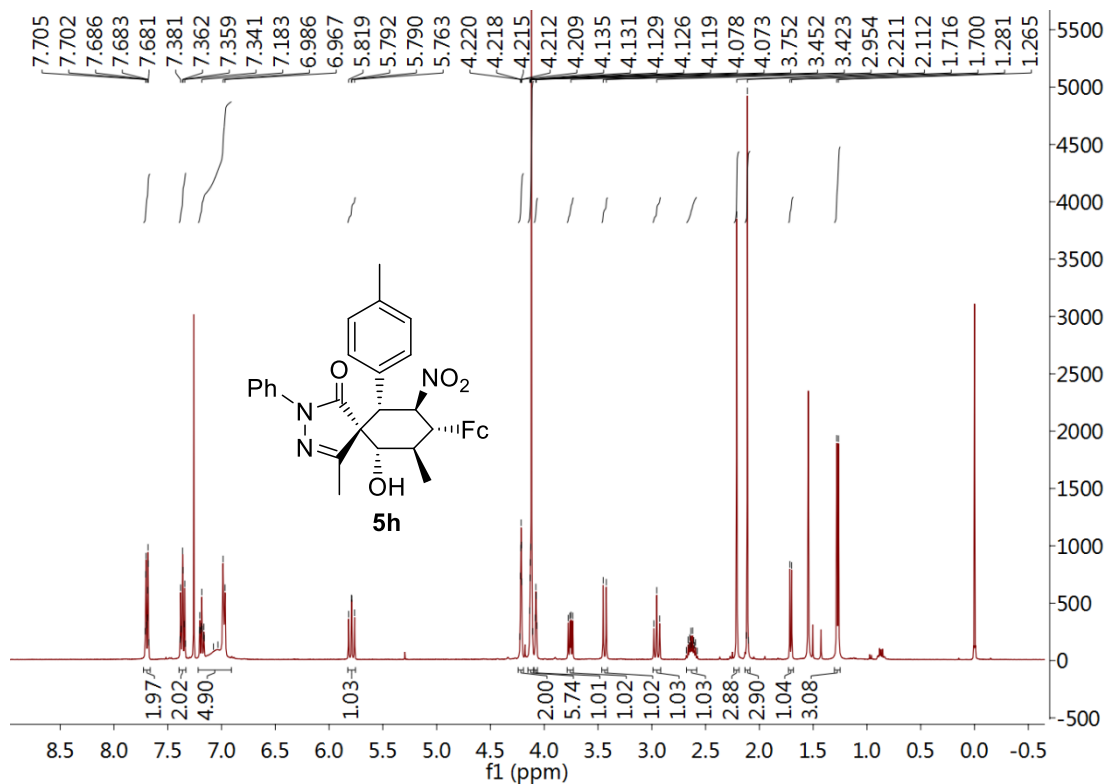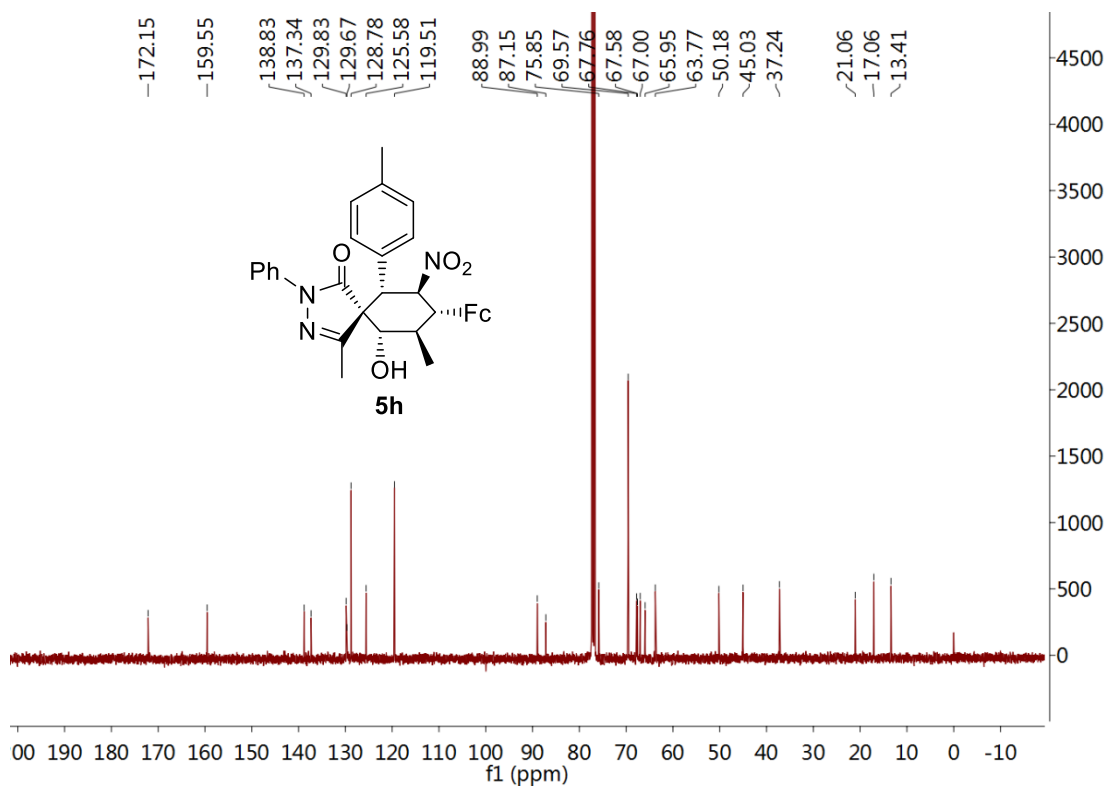

# <Chromatogram>

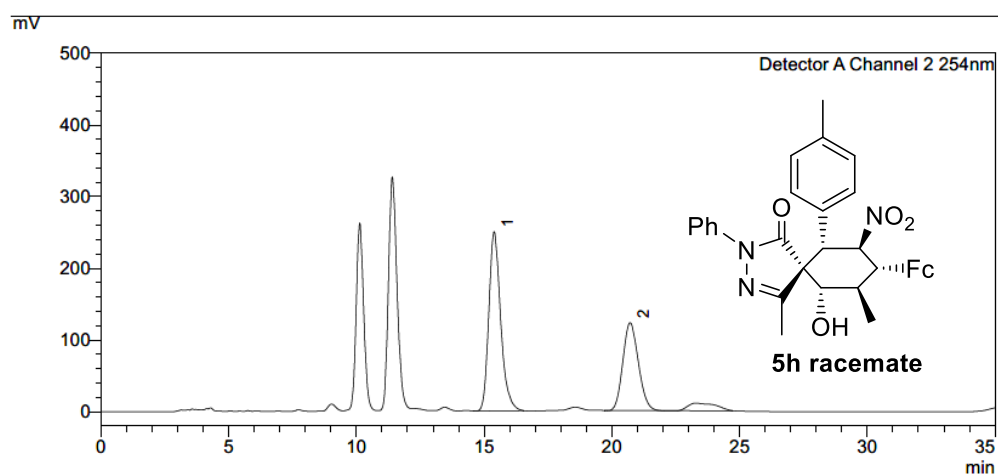

## <Peak Table>

Detector A Channel 2 254nm

| Peak# | Ret. Time | Area     | Height | Conc.  | Area%   |
|-------|-----------|----------|--------|--------|---------|
| 1     | 15.394    | 8045622  | 250034 | 57.522 | 57.522  |
| 2     | 20.715    | 5941365  | 122587 | 42.478 | 42.478  |
| Total |           | 13986987 | 372621 |        | 100.000 |

Detector A Channel 2 254nm

| No.   | Ret. Time | Height (mAu) | Area (mAu*min) | Rel. Area (%) |
|-------|-----------|--------------|----------------|---------------|
| 1     | 14.917    | 19699        | 548960         | 1.650         |
| 2     | 21.154    | 785684       | 32711437       | 98.350        |
| Total |           | 805383       | 33260397       | 100.000       |

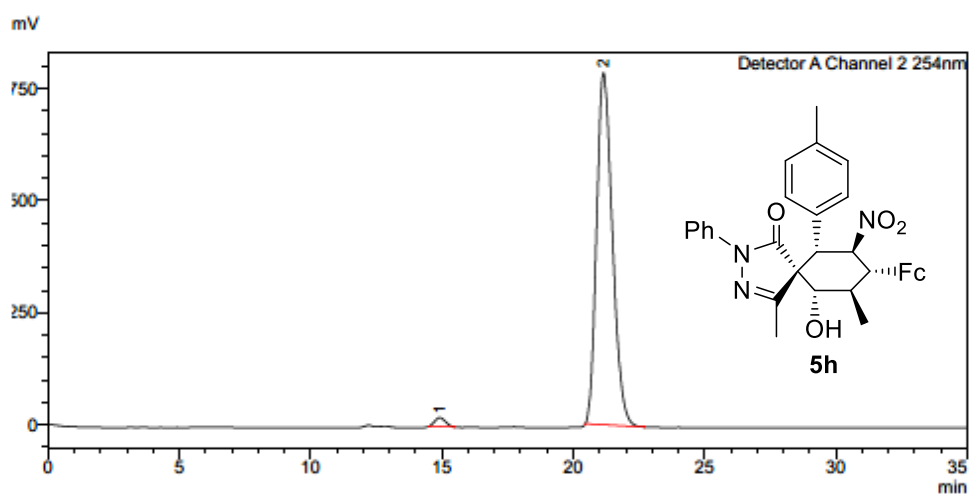

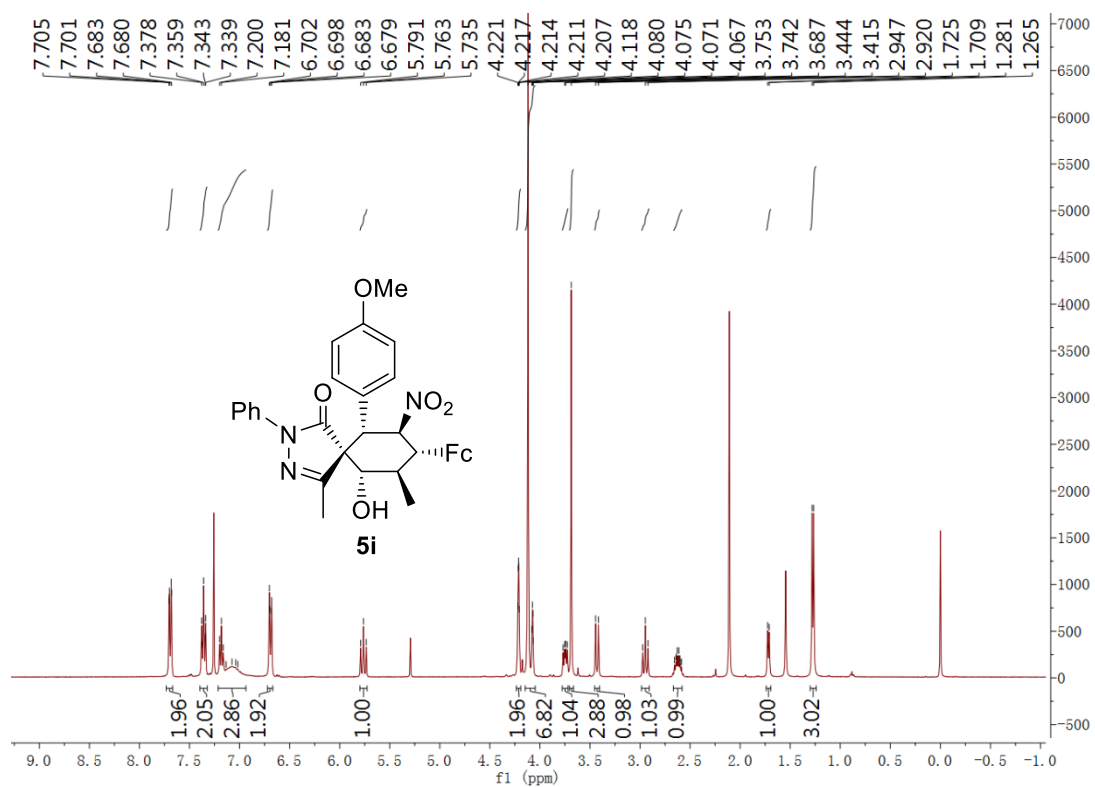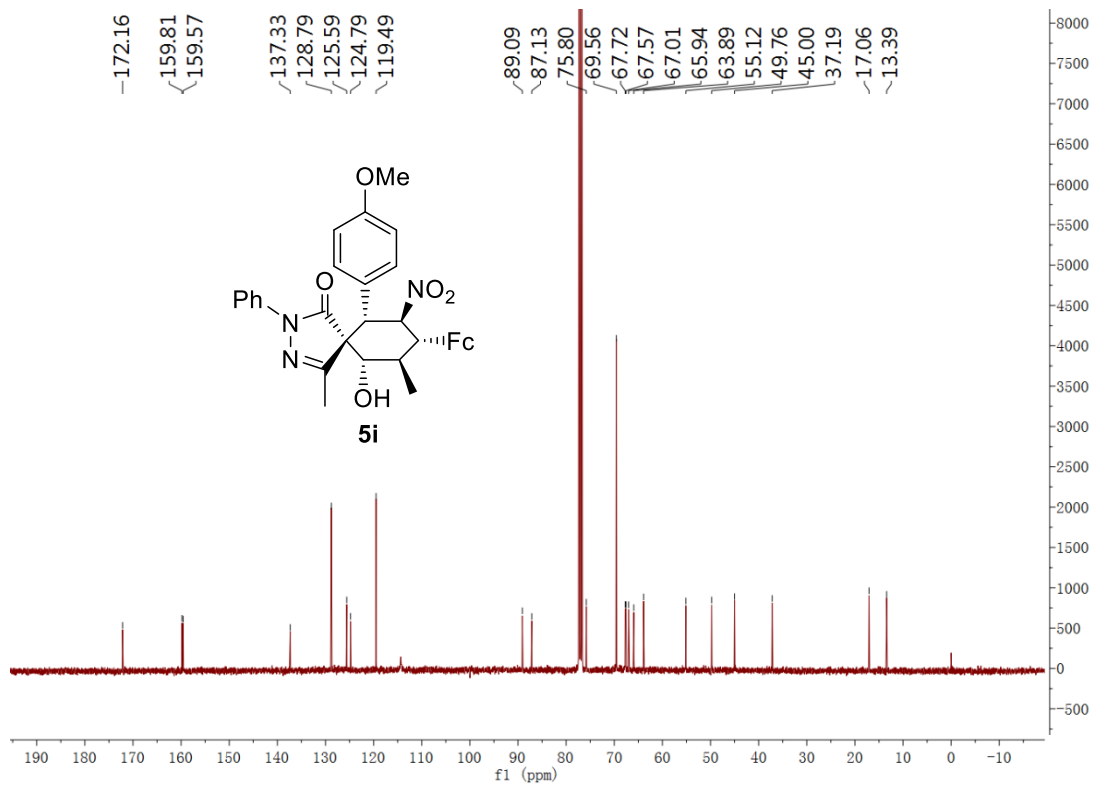

Detector A Channel 2 254nm

| No.   | Ret. Time | Height (mAu) | Area (mAu*min) | Rel. Area (%) |
|-------|-----------|--------------|----------------|---------------|
| 1     | 17.493    | 64706        | 2329282        | 50.155        |
| 2     | 22.220    | 52358        | 2314849        | 49.845        |
| Total |           | 117064       | 4644131        | 100.000       |

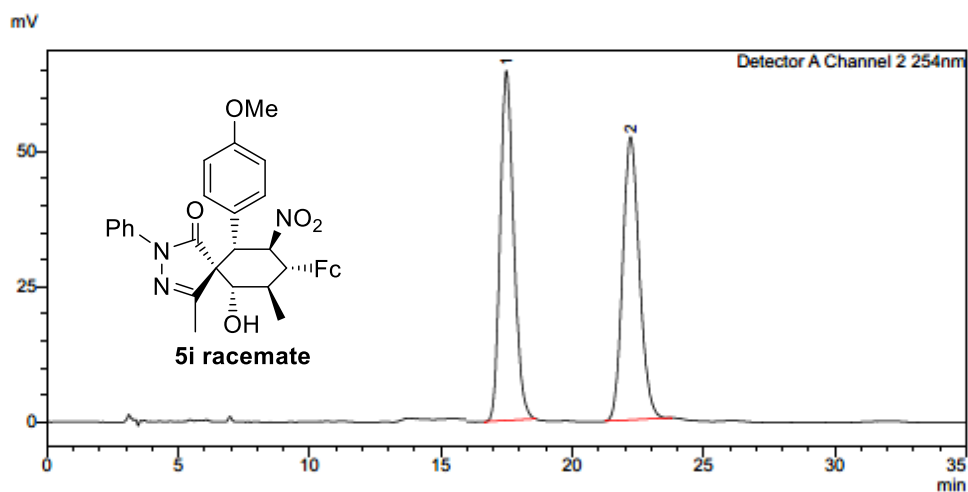

Detector A Channel 2 254nm

| No.   | Ret. Time | Height (mAu) | Area (mAu*min) | Rel. Area (%) |
|-------|-----------|--------------|----------------|---------------|
| 1     | 17.544    | 7017         | 203568         | 0.845         |
| 2     | 22.186    | 531335       | 23898685       | 99.155        |
| Total |           | 538351       | 24102253       | 100.000       |

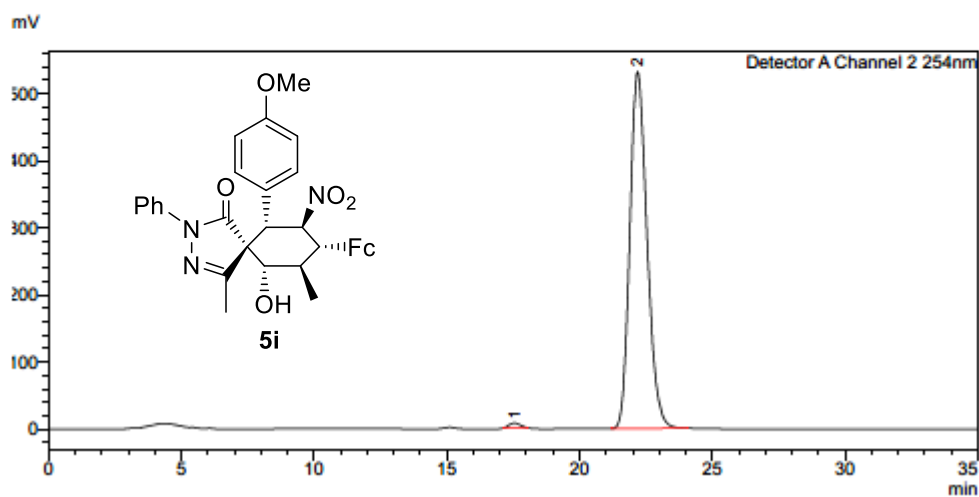

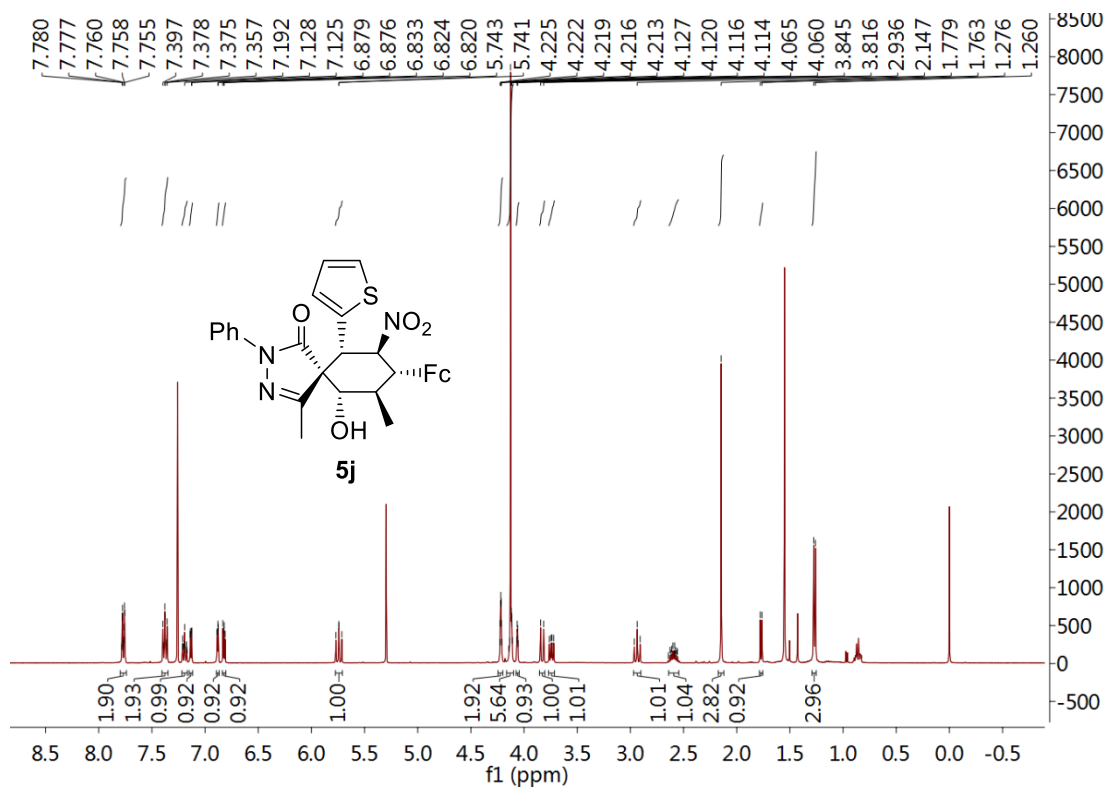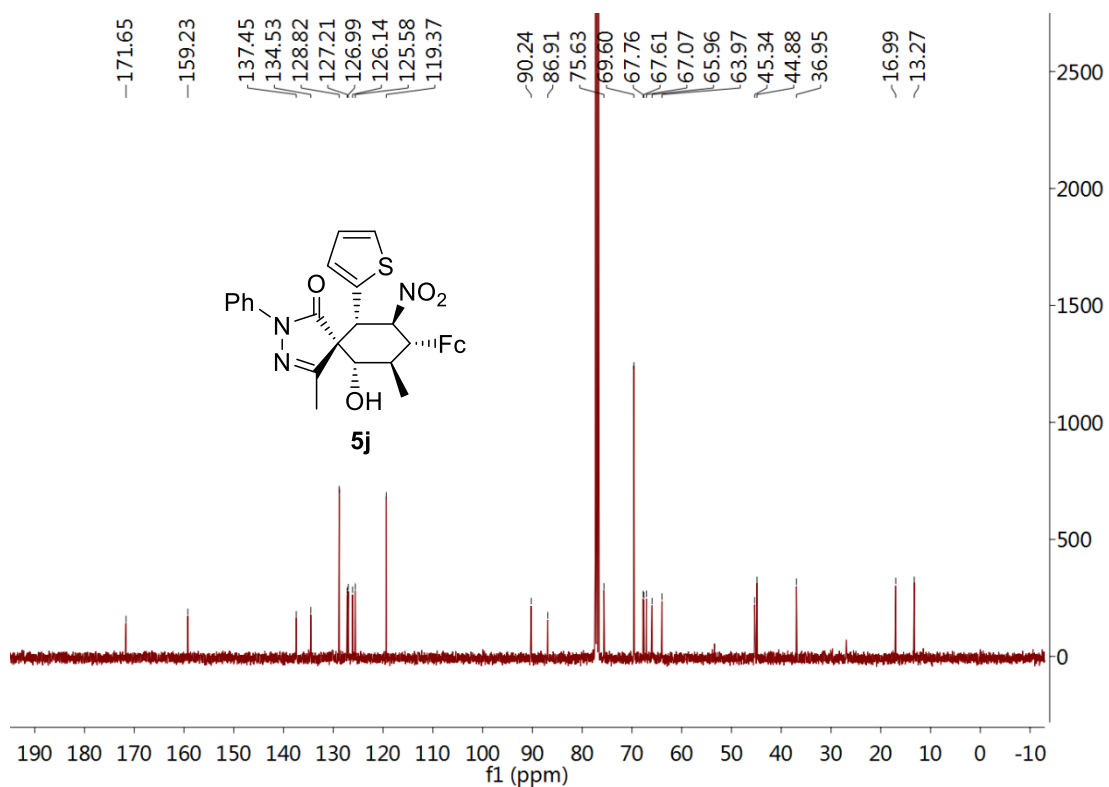





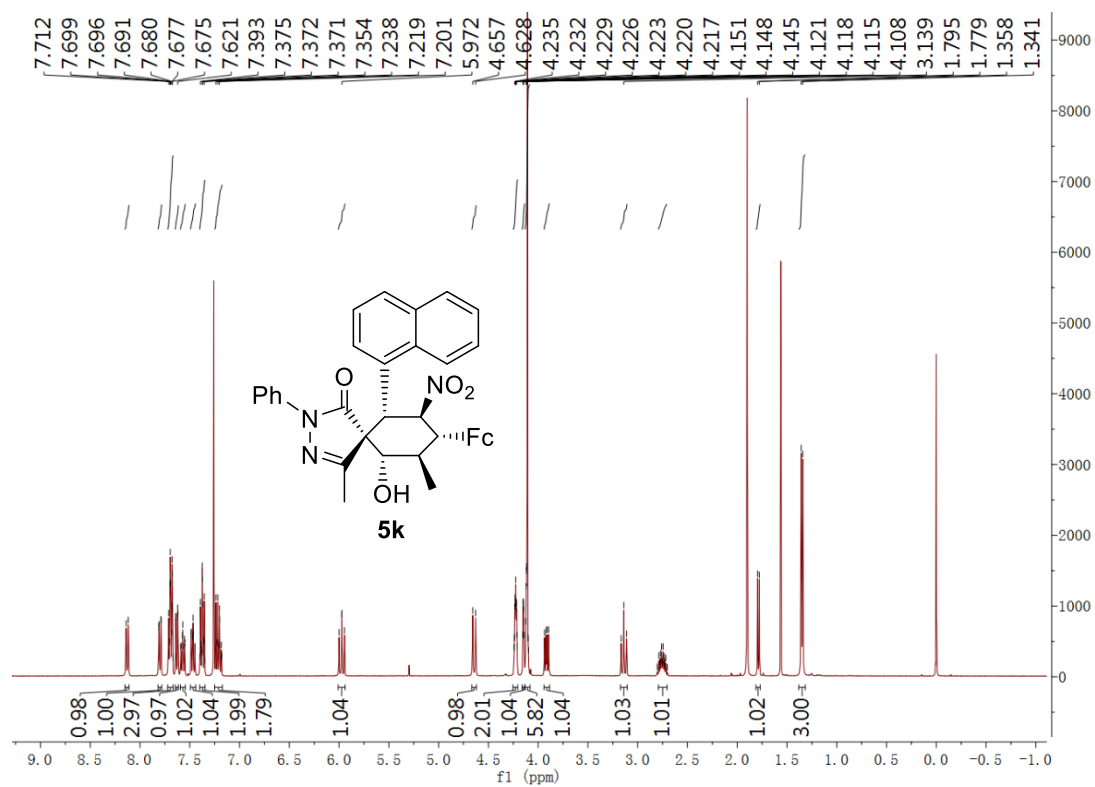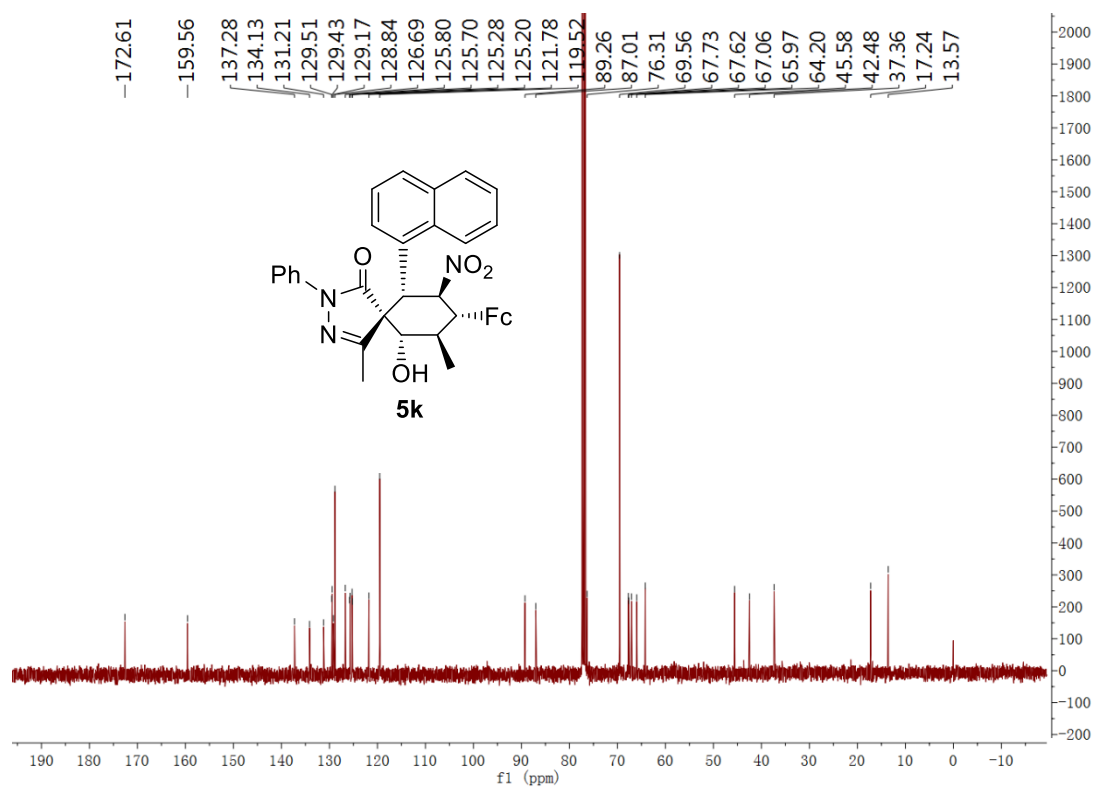

# <Chromatogram>

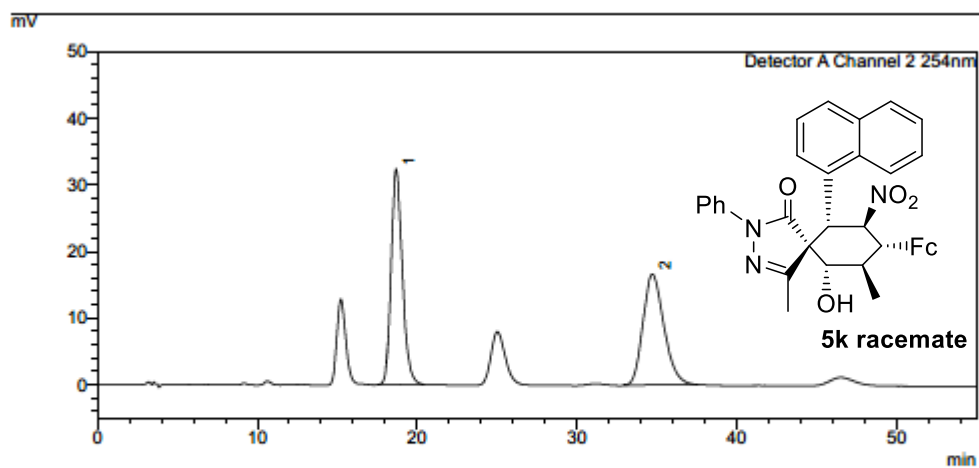

## <Peak Table>

Detector A Channel 2 254nm

| Peak# | Ret. Time | Area    | Height | Conc.  | Area%   |
|-------|-----------|---------|--------|--------|---------|
| 1     | 18.686    | 1561365 | 32389  | 50.680 | 50.680  |
| 2     | 34.719    | 1519490 | 16643  | 49.320 | 49.320  |
| Total |           | 3080855 | 49032  |        | 100.000 |

# <Chromatogram>

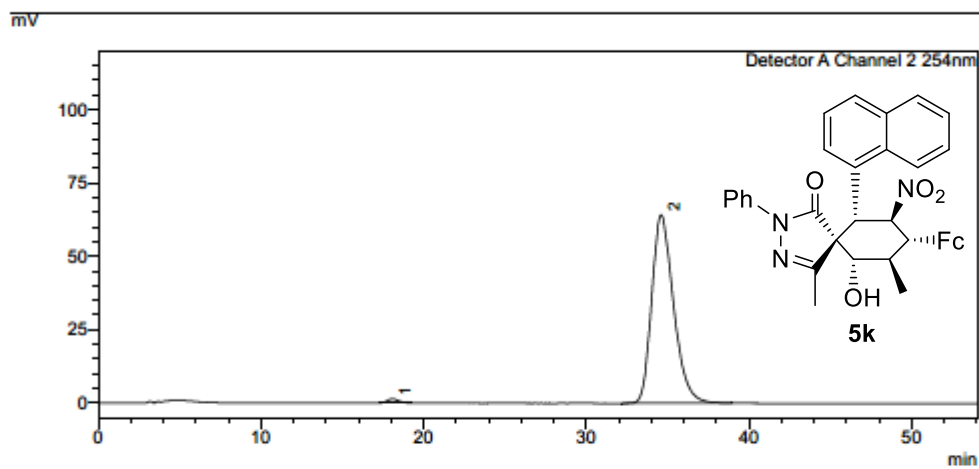

## <Peak Table>

Detector A Channel 2 254nm

| Peak# | Ret. Time | Area    | Height | Conc.  | Area%   |
|-------|-----------|---------|--------|--------|---------|
| 1     | 18.094    | 66853   | 1407   | 1.105  | 1.105   |
| 2     | 34.610    | 5984236 | 64148  | 98.895 | 98.895  |
| Total |           | 6051088 | 65554  |        | 100.000 |

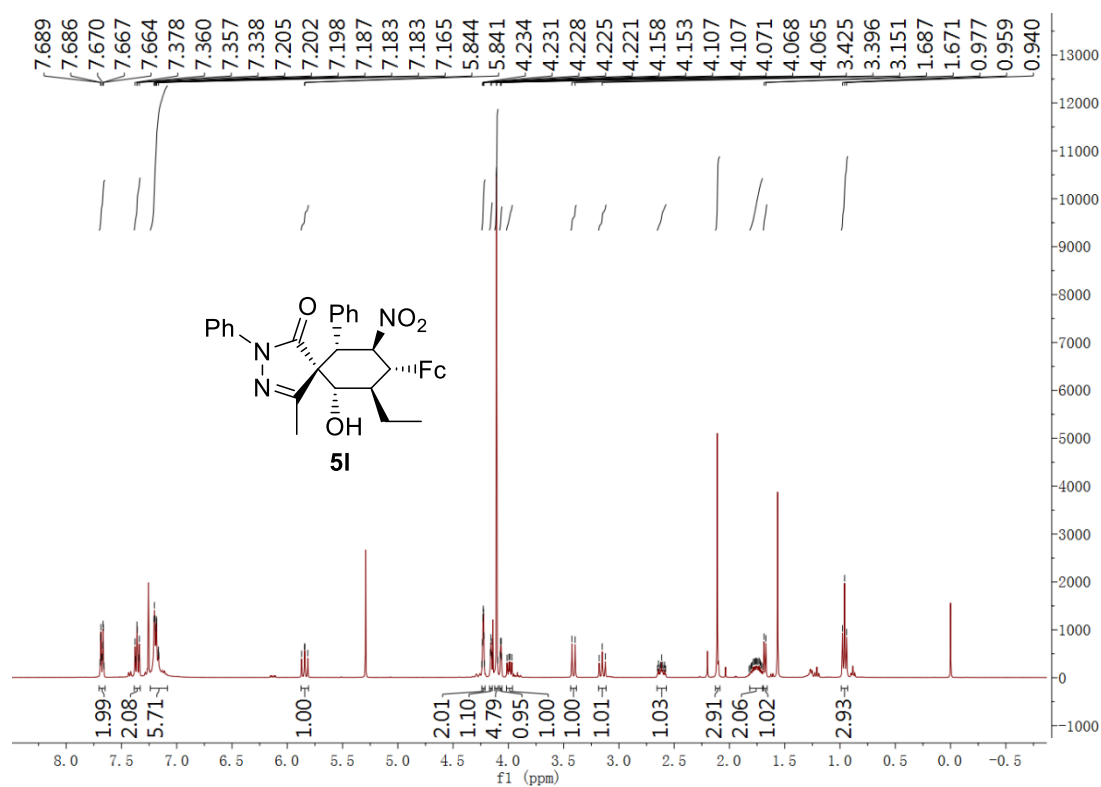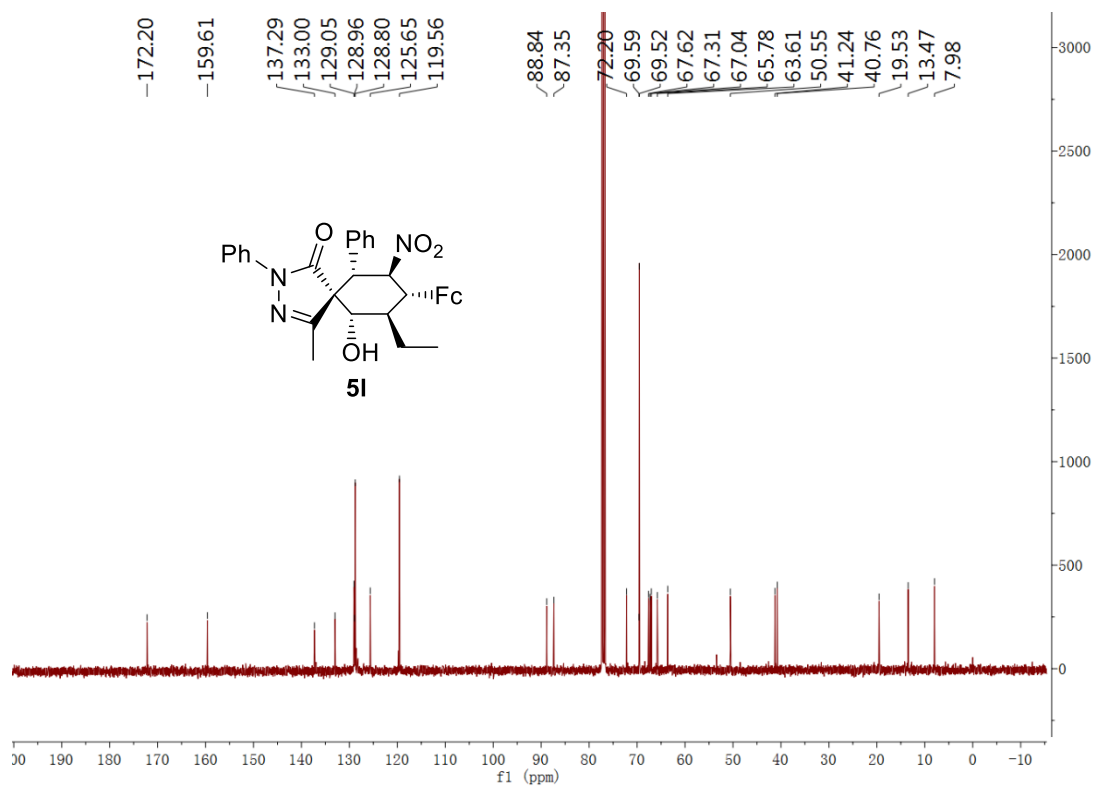

# <Chromatogram>

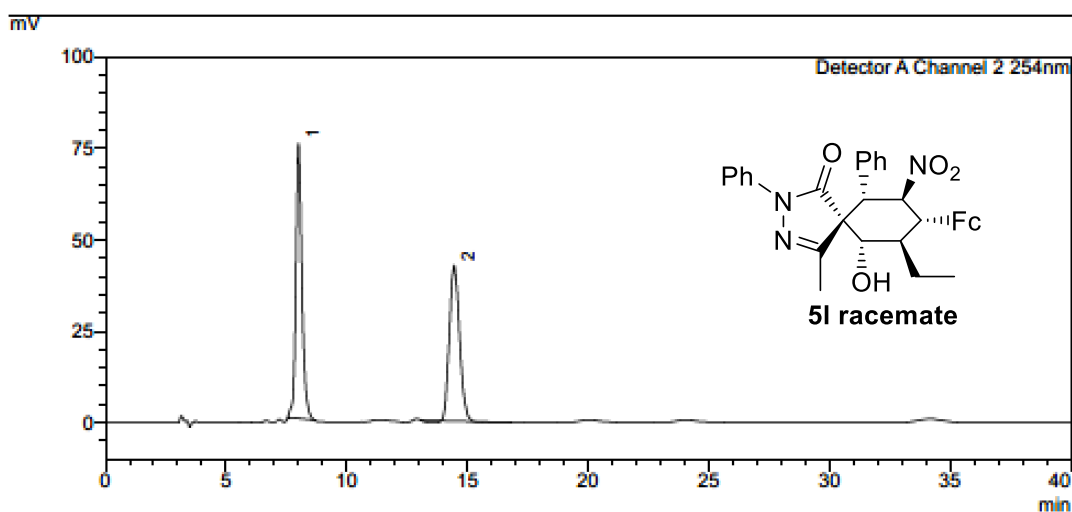

## <Peak Table>

Detector A Channel 2 254nm

| Peak# | Ret. Time | Area    | Height | Conc.  | Area%   |
|-------|-----------|---------|--------|--------|---------|
| 1     | 8.002     | 1321233 | 75342  | 52.206 | 52.206  |
| 2     | 14.449    | 1209596 | 42582  | 47.794 | 47.794  |
| Total |           | 2530829 | 117924 |        | 100.000 |

# <Chromatogram>

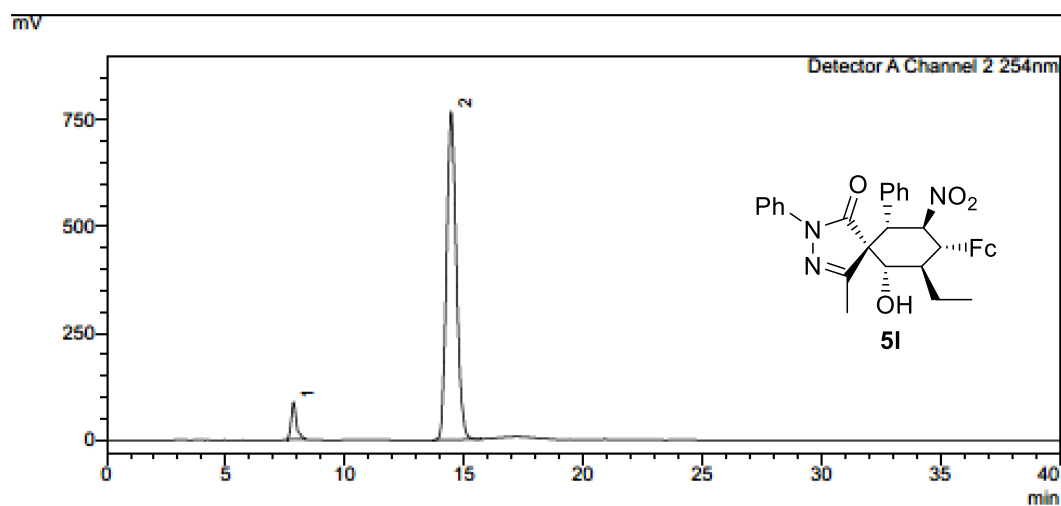

## <Peak Table>

Detector A Channel 2 254nm

| Peak# | Ret. Time | Area     | Height | Conc.  | Area%   |
|-------|-----------|----------|--------|--------|---------|
| 1     | 7.945     | 933575   | 32608  | 4.069  | 4.069   |
| 2     | 14.460    | 22010035 | 768765 | 95.931 | 95.931  |
| Total |           | 22943610 | 801373 |        | 100.000 |

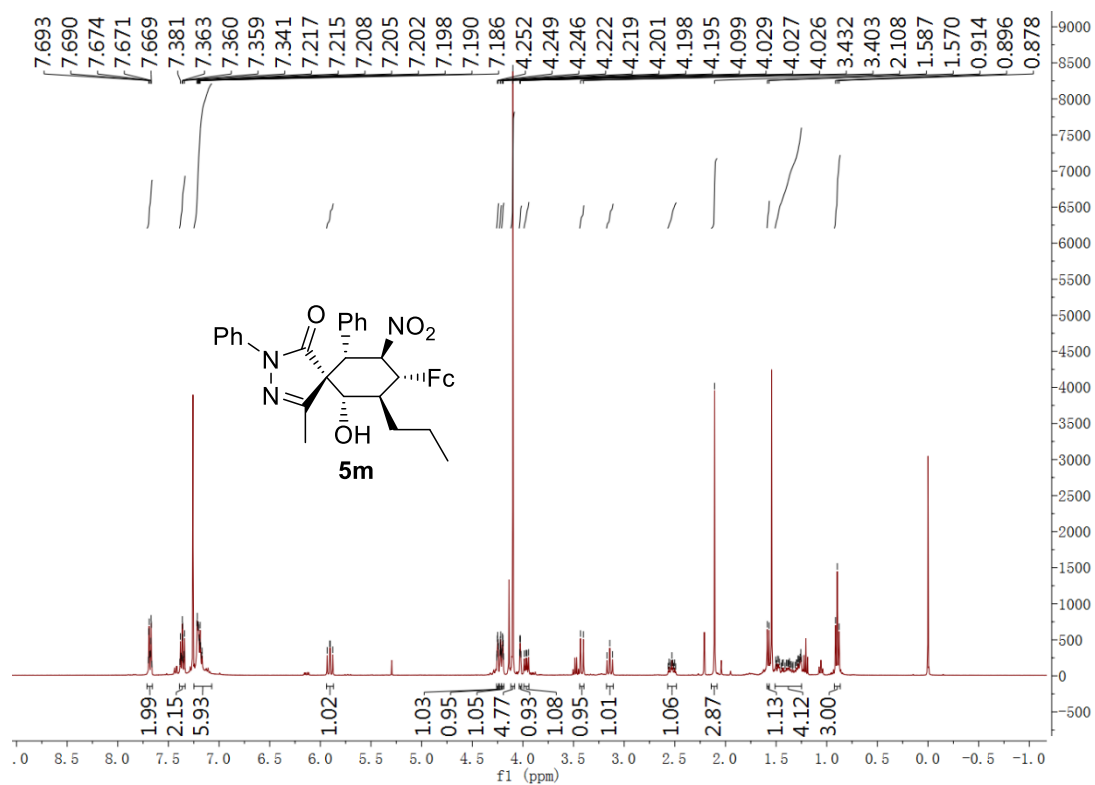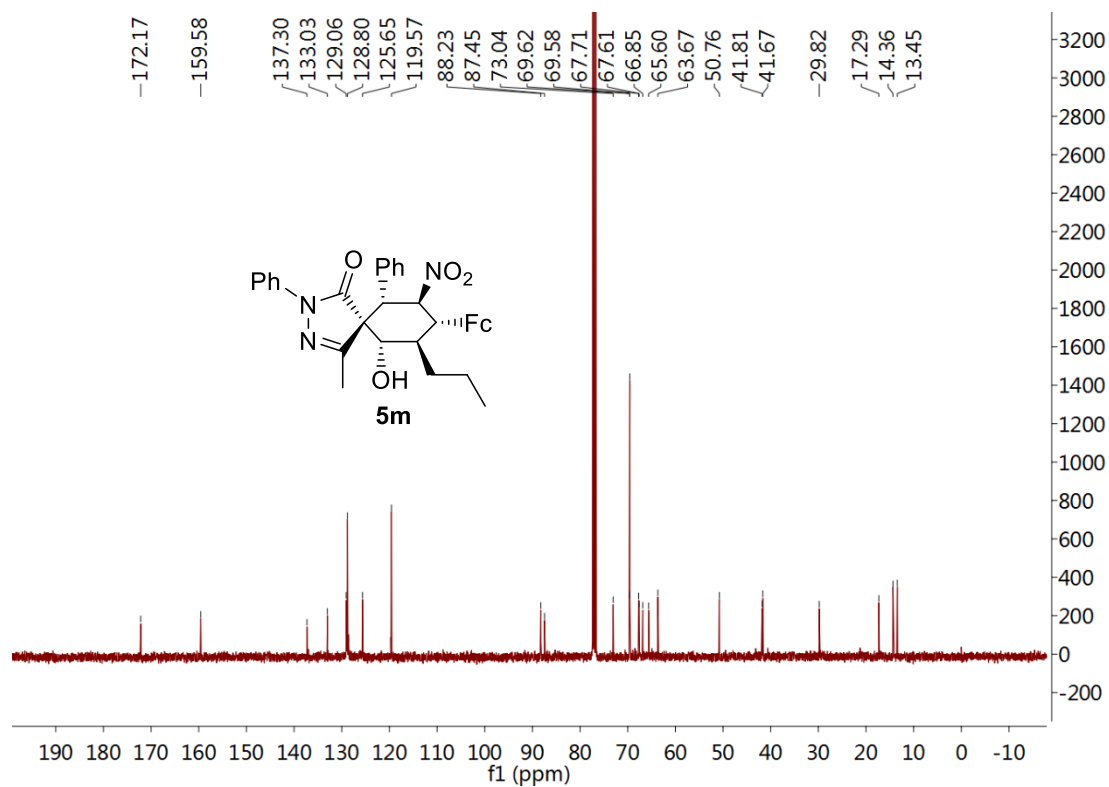

# <Chromatogram>

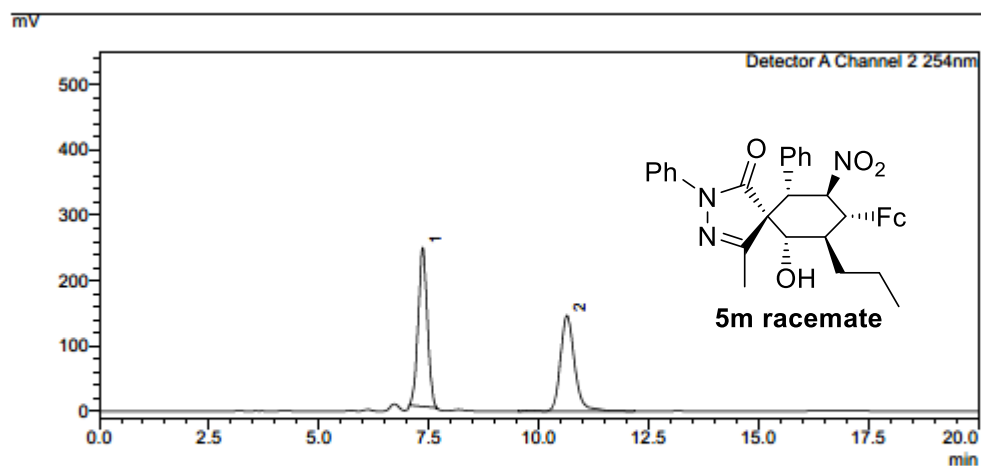

## <Peak Table>

Detector A Channel 2 254nm

| Peak# | Ret. Time | Area    | Height | Conc.  | Area%   |
|-------|-----------|---------|--------|--------|---------|
| 1     | 7.361     | 3509524 | 242947 | 51.472 | 51.472  |
| 2     | 10.644    | 3308832 | 146539 | 48.528 | 48.528  |
| Total |           | 6818356 | 389486 |        | 100.000 |

# <Chromatogram>

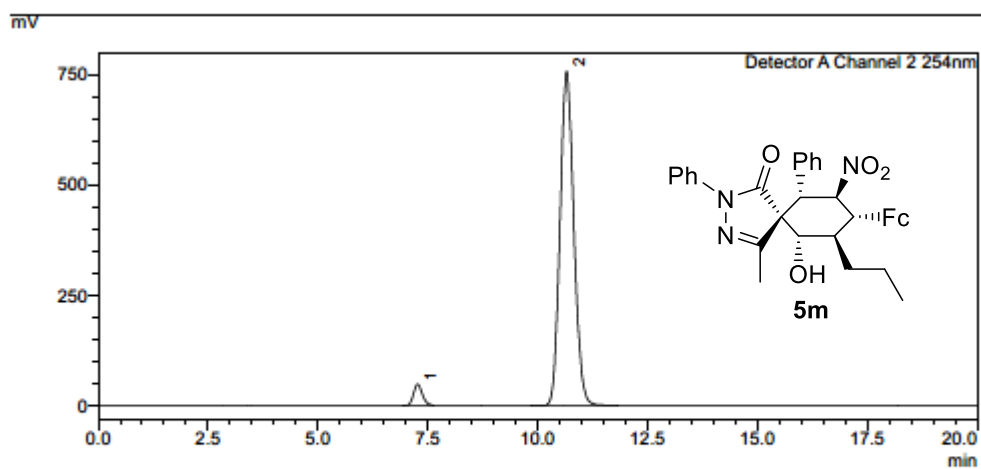

## <Peak Table>

Detector A Channel 2 254nm

| Peak# | Ret. Time | Area     | Height | Conc.  | Area%   |
|-------|-----------|----------|--------|--------|---------|
| 1     | 7.267     | 668395   | 48029  | 3.889  | 3.889   |
| 2     | 10.659    | 16520480 | 758013 | 96.111 | 96.111  |
| Total |           | 17188875 | 806042 |        | 100.000 |

# 5. RalA mRNA and protein expression in pancreatic cancer tissues (Figure S1)

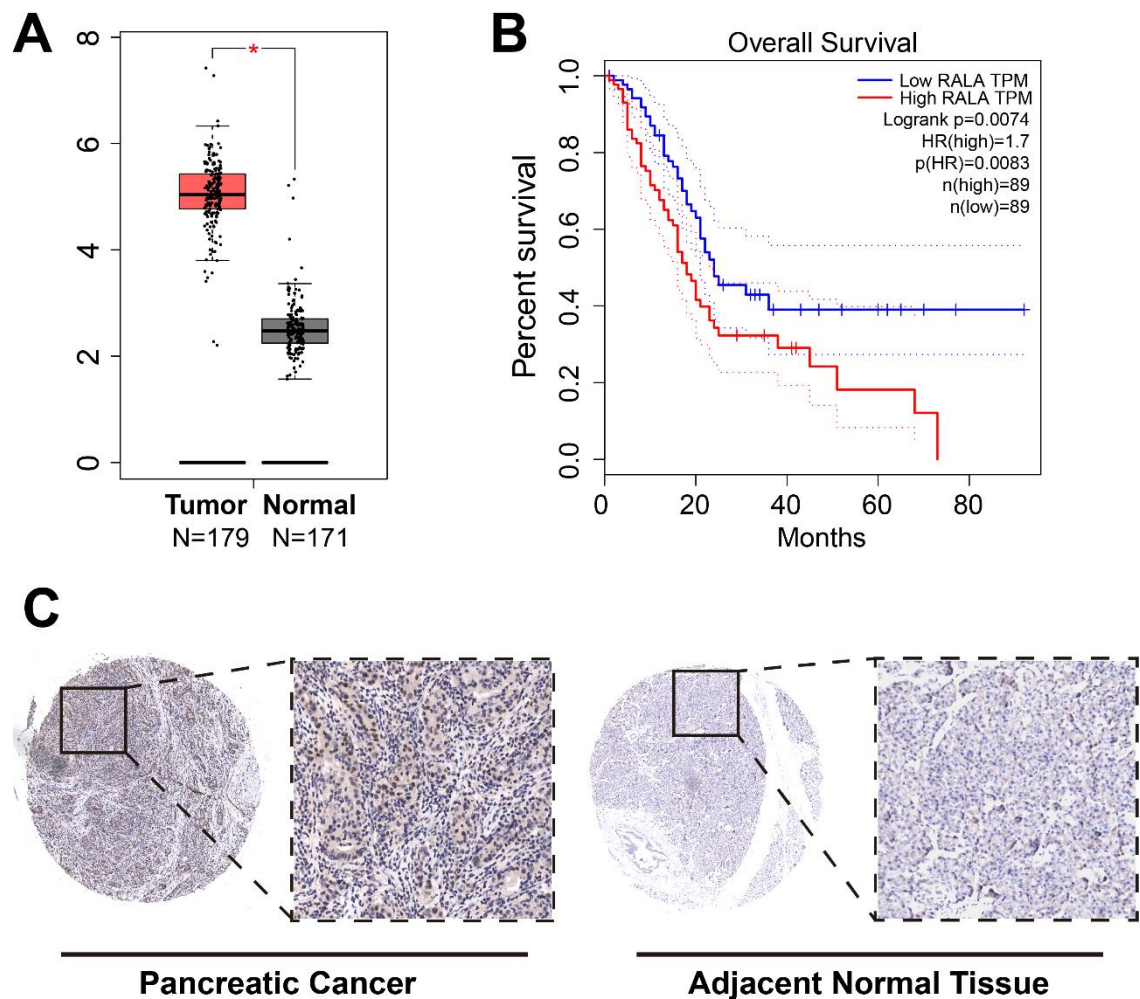

**Figure S1.** (A) Scatter plot of RalA expression in pancreatic cancer and adjacent normal tissues; (B) Kaplan-Meier plots revealed an association between increased RalA levels and reduced overall survival; (C) The immunohistochemistry staining of RalA protein in pancreatic cancer and adjacent normal tissues ( $\times 100$ ).

## 6. Preliminary screening of the anti-proliferative activity (Table S2) <sup>a,b</sup>

| Compound  | IC <sub>50</sub> Values (μM) |        |         |
|-----------|------------------------------|--------|---------|
|           | RalA                         | PANC-1 | HPAF-II |
| <b>4a</b> | 40.41                        | 19.75  | 28.29   |
| <b>4b</b> | 24.95                        | 17.51  | 26.4    |
| <b>4c</b> | >50                          | 36.04  | 49.42   |
| <b>4d</b> | >50                          | 32.05  | 41.32   |
| <b>4e</b> | 38.28                        | 27.04  | 35.52   |
| <b>4f</b> | >50                          | 20.48  | 46.89   |
| <b>4g</b> | 37.18                        | 30.46  | 38.47   |
| <b>4h</b> | 46.46                        | 20.49  | 38.22   |
| <b>4i</b> | >50                          | 40.88  | 35.33   |
| <b>4j</b> | >50                          | 37.09  | 47.44   |
| <b>4k</b> | 29.82                        | 19.94  | 28.42   |
| <b>4l</b> | 35.27                        | 17.93  | 27.82   |
| <b>4m</b> | >50                          | 37.47  | 32.48   |
| <b>4n</b> | 23.6                         | 18.03  | 16.97   |
| <b>4o</b> | 42.5                         | 25.98  | 29.06   |
| <b>5a</b> | 9.03                         | 7.12   | 11.93   |
| <b>5b</b> | 1.2                          | 1.58   | 4.79    |
| <b>5c</b> | 6.17                         | 3.81   | 9.14    |
| <b>5d</b> | 10.9                         | 8.62   | 11.1    |
| <b>5e</b> | 1.32                         | 4.54   | 6.31    |
| <b>5f</b> | 2.92                         | 5.47   | 6.58    |
| <b>5g</b> | 7.55                         | 7.14   | 12.77   |
| <b>5h</b> | 3.98                         | 14.23  | 13.12   |
| <b>5i</b> | 11.54                        | 5.07   | 13.03   |
| <b>5j</b> | 3.58                         | 7.58   | 11.17   |
| <b>5k</b> | 22.64                        | 14.22  | 22.67   |
| <b>5l</b> | 11.27                        | 6.09   | 12.58   |
| <b>5m</b> | 8.19                         | 8.04   | 11.76   |
| <b>5n</b> | 5.94                         | 3.46   | 12.17   |
| <b>5o</b> | 12.86                        | 7.15   | 15.31   |

<sup>a</sup> The enzymatic IC<sub>50</sub> values were determined from HTRF based assays for RalA. The cytotoxicity IC<sub>50</sub> values were determined by using MTT methods; <sup>b</sup> Each compound was tested in triplicate; the data are presented as the mean values.



## 7. The superposition of binding conforms of 9e and p53 peptide (Figure S2)

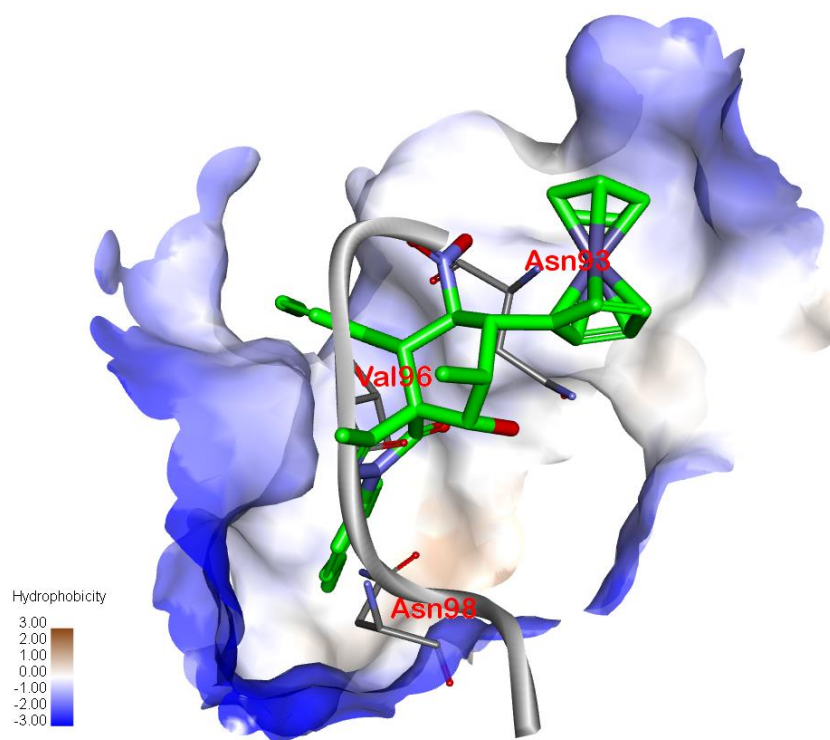

**Figure S2.** The potential binding modes of 5b to RalA. The binding mode of C3 exoenzyme peptide to RalA was shown in gray as a reference.

## 8. The intracellular ROS induced by **5b** and **5b'** (Figure S3)

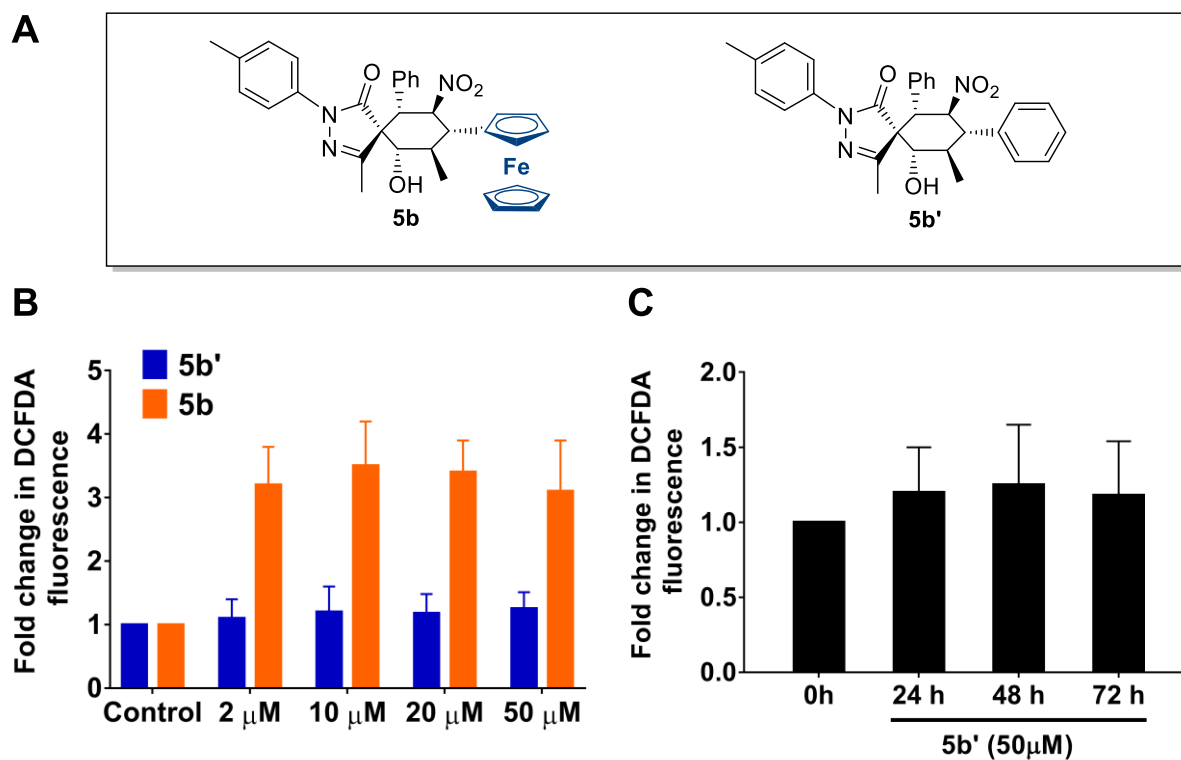

**Figure S3.** (A) Chemical structures of **5b** and **5b'**; (B) The changes in fluorescence of the ROS probe DCFDA in PANC-1 cells treated with compound **5b** or **5b'** in different concentration; (C) The changes in fluorescence of the ROS probe DCFDA in PANC-1 cells treated with 50  $\mu$ M compound **5b'** under different incubation times.
